# Supplementary material
Source: publisher figshare collection journal article supplement (https://brill.figshare.com/ndownloader/files/30774034)
Supplement: Supplementary file 1 [file 30774034]

## Sheet: Table S1
Table S1. Distribution data of the genus Anguis.
Species	Country	Locality or UTM5k	Latitude	Longitude	Elevation	Data source	Accuracy	Museum/field/internal codes	GenBank (mtDNA)
Anguis cephallonica	Greece	001	38,12	21,76	328	Tzoras, personal database	GPS
Anguis cephallonica	Greece	002	38,24	21,78	289	Tzoras, personal database	GPS
Anguis cephallonica	Greece	003	38,13	21,79	870	Tzoras, personal database	GPS
Anguis cephallonica	Greece	004	38,27	21,84	645	Tzoras, personal database	GPS
Anguis cephallonica	Greece	005	38,27	21,90	567	Tzoras, personal database	GPS
Anguis cephallonica	Greece	006	37,98	21,90	953	Tzoras, personal database	GPS
Anguis cephallonica	Greece	007	37,86	22,28	710	Tzoras, personal database	GPS
Anguis cephallonica	Greece	008	37,85	22,33	707	Tzoras, personal database	GPS
Anguis cephallonica	Greece	009	37,85	22,44	613	Tzoras, personal database	GPS
Anguis cephallonica	Greece	010	37,86	22,46	617	Tzoras, personal database	GPS
Anguis cephallonica	Greece	011	37,89	22,51	654	Tzoras, personal database	GPS
Anguis cephallonica	Greece	012	36,89	22,28	617	Deschandol, personal database	GPS
Anguis cephallonica	Greece	013	36,91	22,25	394	Deschandol, personal database	GPS
Anguis cephallonica	Greece	014	36,94	22,20	291	Deschandol, personal database	GPS
Anguis cephallonica	Greece	015	36,95	21,71	43	Deschandol, personal database	GPS
Anguis cephallonica	Greece	016	37,04	22,20	771	Deschandol, personal database	GPS
Anguis cephallonica	Greece	017	37,29	22,04	555	Deschandol, personal database	GPS
Anguis cephallonica	Greece	018	37,85	22,46	600	Deschandol, personal database	GPS
Anguis cephallonica	Greece	019	37,85	22,48	725	Deschandol, personal database	GPS
Anguis cephallonica	Greece	020	37,92	22,29	924	Deschandol, personal database	GPS
Anguis cephallonica	Greece	021	37,93	22,29	879	Deschandol, personal database	GPS
Anguis cephallonica	Greece	022	38,24	20,64	14	Balcanica.info database	GPS
Anguis cephallonica	Greece	023	38,15	20,77	70	Strachinis, personal database	GPS
Anguis cephallonica	Greece	024	38,12	21,76	328	Strachinis, personal database	GPS
Anguis cephallonica	Greece	025	38,24	21,78	289	Strachinis, personal database	GPS
Anguis cephallonica	Greece	026	38,26	21,90	720	Strachinis, personal database	GPS
Anguis cephallonica	Greece	34SDG3	37.7633	20.7501		Sillero et al., 2014	Centre grid
Anguis cephallonica	Greece	34SDH3	38.4225	20.6642		Sillero et al., 2014	Centre grid
Anguis cephallonica	Greece	34SDH4	38.1572	20.5352		Sillero et al., 2014	Centre grid
Anguis cephallonica	Greece	34SEF3	37.0387	22.1111		Sillero et al., 2014	Centre grid
Anguis cephallonica	Greece	34SEG3	37.5118	21.6018		Sillero et al., 2014	Centre grid
Anguis cephallonica	Greece	34SEG3	37.567	22.0025		Sillero et al., 2014	Centre grid
Anguis cephallonica	Greece	34SEG3	37.5934	22.0379		Sillero et al., 2014	Centre grid
Anguis cephallonica	Greece	34SEG4	37.1059	22.116		Sillero et al., 2014	Centre grid
Anguis cephallonica	Greece	34SEG4	37.3894	21.7038		Sillero et al., 2014	Centre grid
Anguis cephallonica	Greece	34SEH4	38.0285	22.1092		Sillero et al., 2014	Centre grid
Anguis cephallonica	Greece	34SEH4	38.0554	22.127		Sillero et al., 2014	Centre grid
Anguis cephallonica	Greece	34SFF1	36.6632	22.4357		Sillero et al., 2014	Centre grid
Anguis cephallonica	Greece	34SFF1	36.9811	22.228		Sillero et al., 2014	Centre grid
Anguis cephallonica	Greece	34SFF1	36.9353	22.2028		Sillero et al., 2014	Centre grid
Anguis cephallonica	Greece	34SFF1	36.8792	22.2829		Sillero et al., 2014	Centre grid
Anguis cephallonica	Greece	34SFF1	36.8811	22.4558		Sillero et al., 2014	Centre grid
Anguis cephallonica	Greece	34SFF1	36.972	22.268		Sillero et al., 2014	Centre grid
Anguis cephallonica	Greece	34SFF3	36.7073	22.9445		Sillero et al., 2014	Centre grid
Anguis cephallonica	Greece	34SFF3	36.7264	23.0078		Sillero et al., 2014	Centre grid
Anguis cephallonica	Greece	34SFG2	37.3578	22.4882		Sillero et al., 2014	Centre grid
Anguis cephallonica	Greece	34SFG2	37.066	22.3046		Sillero et al., 2014	Centre grid
Anguis cephallonica	Greece	34SFG2	37.2239	22.5972		Sillero et al., 2014	Centre grid
Anguis cephallonica	Greece	34SFG2	37.4358	22.3646		Sillero et al., 2014	Centre grid
Anguis cephallonica	Greece	34SFG2	37.0683	22.3745		Sillero et al., 2014	Centre grid
Anguis cephallonica	Greece	34SFG2	37.0925	22.2966		Sillero et al., 2014	Centre grid
Anguis cephallonica	Greece	34SFG2	37.2682	22.5277		Sillero et al., 2014	Centre grid
Anguis cephallonica	Greece	34SFG2	37.2571	22.4872		Sillero et al., 2014	Centre grid
Anguis cephallonica	Greece	34SFG2	37.082	22.2122		Sillero et al., 2014	Centre grid
Anguis cephallonica	Greece	34SFG4	37.2435	22.8368		Sillero et al., 2014	Centre grid
Anguis cephallonica	Greece	34SFH2	38.1123	22.3074		Sillero et al., 2014	Centre grid
Anguis cephallonica	Greece	34SFH2	38.0478	22.173		Sillero et al., 2014	Centre grid
Anguis cephallonica	Greece	34SFH2	38.187	22.1976		Sillero et al., 2014	Centre grid
Anguis cephallonica	Greece	Agios Petros	37.3	22.49	992	Tzoras, Panagiotopoulos, Manonas, personal database	GPS
Anguis cephallonica	Greece	Agios Vasilios	37,07	22,27	1291	Mikulíček et al., 2018	GPS	2313	MG797454
Anguis cephallonica	Greece	Achaias	38.0284	22.1092		Lymberakis, personal database	GPS	1887
Anguis cephallonica	Greece	Achaias	38.187	22.1976		Lymberakis, personal database	GPS	6935
Anguis cephallonica	Greece	Achaias	38.0554	22.127		Lymberakis, personal database	GPS	8944
Anguis cephallonica	Greece	Achladocampos. Ktenia Mts.	37,51	22,61	519	Thanou et al., 2014	Literature		KJ634783
Anguis cephallonica	Greece	Akoli Lake. Kephallonia Isl.	38,19	20,67	225	Thanou et al., 2014	Literature		KJ634790
Anguis cephallonica	Greece	Amigdalia	37.85	22.28	919	Tzoras, Katsiyiannis, personal database	GPS
Anguis cephallonica	Greece	Andriolata	38.15	20.72	328	Tzoras, Drakopoulos, personal database	GPS
Anguis cephallonica	Greece	Ano Kastritsi	38,27	21,82	371	Mikulíček et al., 2018	GPS	2034	MG797451
Anguis cephallonica	Greece	Ano Kastritsi	38.27	21.82	335	Tzoras, Drakopoulos, personal database	GPS
Anguis cephallonica	Greece	Ano Kastritsi	38.27	21.84	613	Tzoras, personal database	GPS
Anguis cephallonica	Greece	Ano Vlasia	37.97	21.89	1018	Tzoras, personal database	GPS
Anguis cephallonica	Greece	Anogi	38.42	20.67	589	Tzoras, Galanis, personal database	GPS
Anguis cephallonica	Greece	Anogi	38.42	20.68	473	Tzoras, Strachinis, personal database	GPS
Anguis cephallonica	Greece	Arkadias	37.5743	22.247		Lymberakis, personal database	GPS	1371, 1654, 3564, 3565, 3573, 3580, 3948, 3958
Anguis cephallonica	Greece	Arkadias	37.2435	22.8368		Lymberakis, personal database	GPS	6934
Anguis cephallonica	Greece	Arkadias	37.4358	22.3646		Lymberakis, personal database	GPS	7070
Anguis cephallonica	Greece	Arkadias	37.5743	22.247		Lymberakis, personal database	GPS	7859
Anguis cephallonica	Greece	Arkadias	37.5934	22.0379		Lymberakis, personal database	GPS	8941
Anguis cephallonica	Greece	Arkadias	37.5743	22.247		Lymberakis, personal database	GPS	988
Anguis cephallonica	Greece	Arkadias	37.2259	22.624		Lymberakis, personal database	GPS	NHMC 80.3.3.3
Anguis cephallonica	Greece	Athéras	38.31	20.41	215	Tzoras, Drakopoulos, personal database	GPS
Anguis cephallonica	Greece	Diakou	38.24	21.77	223	Tzoras, personal database	GPS
Anguis cephallonica	Greece	Dirrachio. Erymanthos Mts.	37,15	22,19	823	Thanou et al., 2014	Literature		KJ634793
Anguis cephallonica	Greece	Doxas	37,93	22,28	879	Mikulíček et al., 2018	Literature	2323	MG797455
Anguis cephallonica	Greece	Elati, Mainalo Mts.	37,61	22,15	1273	Thanou et al., 2014	Literature		KJ634782
Anguis cephallonica	Greece	Exogi	38.46	20.63	385	Tzoras, Strachinis, personal database	GPS
Anguis cephallonica	Greece	Exogi	38.46	20.64	136	Tzoras, Strachinis, personal database	GPS
Anguis cephallonica	Greece	Filakes	38.13	21.64	67	Tzoras, Manonas, personal database	GPS
Anguis cephallonica	Greece	Filakes	38.12	21.64	71	Tzoras, Manonas, personal database	GPS
Anguis cephallonica	Greece	Gialova	36,95	21,70	1	Gvoždík et al., 2010	Literature		FJ666586
Anguis cephallonica	Greece	Chimara	36,65	22,47	475	Mikulíček et al., 2018	Literature	2247	MG797452
Anguis cephallonica	Greece	Chora Getson	36,95	22,25	571	Mikulíček et al., 2018	Literature	2294	MG797453
Anguis cephallonica	Greece	Isoma	38.1	21.7	114	Tzoras, Manonas, personal database	GPS
Anguis cephallonica	Greece	Ithaca	38,36	20,72	31	Mikulíček et al., 2018	GPS	2028	MG797450
Anguis cephallonica	Greece	Kaliani	37.88	22.5	640	Tzoras, personal database	GPS
Anguis cephallonica	Greece	Kandila	37.76	22.34	658	Tzoras, Vergetopoulos, Manonas, Karteris, personal database	GPS
Anguis cephallonica	Greece	Kandila	37.73	22.34	708	Tzoras, Vergetopoulos, Manonas, Karteris, personal database	GPS
Anguis cephallonica	Greece	Kardamyli	36.88	22.23	75	iNaturalist, GBIF	GPS
Anguis cephallonica	Greece	Karteri	37.85	22.47	672	Tzoras, personal database	GPS
Anguis cephallonica	Greece	Karteri	37.83	22.44	781	Tzoras, personal database	GPS
Anguis cephallonica	Greece	Karteri	37.83	22.41	798	Tzoras, personal database	GPS
Anguis cephallonica	Greece	Karteri	37.85	22.44	624	Tzoras, personal database	GPS
Anguis cephallonica	Greece	Karteri	37.85	22.46	610	Tzoras, Vergetopoulos, Galanis, Nanos, personal database	GPS
Anguis cephallonica	Greece	Karteri	37.84	22.43	612	Tzoras, Vergetopoulos, personal database	GPS
Anguis cephallonica	Greece	Kato Platanovrisi	38.13	21.74	249	Tzoras, Manonas, personal database	GPS
Anguis cephallonica	Greece	Kato Vlasia	37.98	21.9	941	Tzoras, personal database	GPS
Anguis cephallonica	Greece	Kato-Figalya	37.44	21.78	453	Tzoras, personal database	GPS
Anguis cephallonica	Greece	Kefallonias	38.1151	20.5213		Lymberakis, personal database	GPS	10924, 10925
Anguis cephallonica	Greece	Kefallonias	38.2323	20.57		Lymberakis, personal database	GPS	4121, 4266, 5965, 5966, 5967
Anguis cephallonica	Greece	Kefallonias	38.4225	20.6642		Lymberakis, personal database	GPS	5968
Anguis cephallonica	Greece	Kefallonias	38.2323	20.57		Lymberakis, personal database	GPS	6649
Anguis cephallonica	Greece	Kefallonias	38.2323	20.57		Lymberakis, personal database	GPS	7854
Anguis cephallonica	Greece	Kertezi	37.99	22.06	771	Tzoras, Katsiyiannis, Manonas, Panagiotopoulos, Papaioannou, personal database	GPS
Anguis cephallonica	Greece	Kimisi	38.12	21.78	741	Tzoras, Katsiyiannis, personal database	GPS
Anguis cephallonica	Greece	Kimisi	38.11	21.76	242	Tzoras, personal database	GPS
Anguis cephallonica	Greece	Kimisi	38.12	21.76	234	Tzoras, personal database	GPS
Anguis cephallonica	Greece	Kionia	37.86	22.46	216	Tzoras, personal database	GPS
Anguis cephallonica	Greece	Kionia	37.86	22.45	639	Tzoras, Vergetopoulos, personal database	GPS
Anguis cephallonica	Greece	Korakovouni	37,35	22,75	46	Jablonski, personal database	GPS	5795
Anguis cephallonica	Greece	Korinthias	37.8568	22.4517		Lymberakis, personal database	GPS	NHMC 80.3.3.1
Anguis cephallonica	Greece	Kornellos	38.11	20.76	313	Tzoras, Drakopoulos, personal database	GPS
Anguis cephallonica	Greece	Kornellos	38.1	20.79	214	Tzoras, Drakopoulos, personal database	GPS
Anguis cephallonica	Greece	Kornellos	38.11	20.75	157	Tzoras, Drakopoulos, personal database	GPS
Anguis cephallonica	Greece	Krastiki	37.98	22.01	774	Tzoras, Katsiyiannis, Manonas, Panagiotopoulos, Papaioannou, personal database	GPS
Anguis cephallonica	Greece	Krastiki	38	22.06	720	Tzoras, Vazquez Grana, personal database	GPS
Anguis cephallonica	Greece	Lafka	37.84	22.39	761	Tzoras, Galanis, personal database	GPS
Anguis cephallonica	Greece	Laggadia. Mainalo Mts.	37,67	22,02	787	Thanou et al., 2014	Literature		KJ634788
Anguis cephallonica	Greece	Lagia. Mani Pen.	36,47	22,47	422	Thanou et al., 2014	Literature		KJ634795
Anguis cephallonica	Greece	Lakkomata	38.03	21.88	910	Tzoras, Galanis, personal database	GPS
Anguis cephallonica	Greece	Lakonias	37.066	22.3046		Lymberakis, personal database	GPS	1474
Anguis cephallonica	Greece	Lakonias	37.2239	22.5972		Lymberakis, personal database	GPS	1475
Anguis cephallonica	Greece	Lakonias	37.066	22.3046		Lymberakis, personal database	GPS	1886
Anguis cephallonica	Greece	Lakonias	37.0683	22.3745		Lymberakis, personal database	GPS	8942
Anguis cephallonica	Greece	Lakonias	36.7264	23.0078		Lymberakis, personal database	GPS	8945
Anguis cephallonica	Greece	Lakonias	37.2683	22.5278		Lymberakis, personal database	GPS	8947
Anguis cephallonica	Greece	Lakonias	37.2571	22.4872		Lymberakis, personal database	GPS	8948
Anguis cephallonica	Greece	Lakonias	36.8811	22.4558		Lymberakis, personal database	GPS	8949
Anguis cephallonica	Greece	Leontari, Taygetos Mts.	37,31	22,15	657	Thanou et al., 2014	Literature		KJ634792
Anguis cephallonica	Greece	Lithovounia	37.47	22.45	669	Tzoras, Vergetopoulos, Katsiyiannis, Manonas, Karteris, personal database	GPS
Anguis cephallonica	Greece	Louzi	37.9	22.28	914	Tzoras, Katsiyiannis, Panagiotopoulos, Daoultzis, personal database	GPS
Anguis cephallonica	Greece	Louzi	37.86	22.26	925	Tzoras, Manonas, Katsiyiannis, personal database	GPS
Anguis cephallonica	Greece	Louzi	37.88	22.24	1129	Tzoras, Manonas, Katsiyiannis, personal database	GPS
Anguis cephallonica	Greece	Mati	37.82	22.33	815	Tzoras, Katsiyiannis, personal database	GPS
Anguis cephallonica	Greece	Messinias	37.0387	22.1111		Lymberakis, personal database	GPS	1218
Anguis cephallonica	Greece	Messinias	37.3894	21.7038		Lymberakis, personal database	GPS	1219
Anguis cephallonica	Greece	Messinias	37.0387	22.1111		Lymberakis, personal database	GPS	1885
Anguis cephallonica	Greece	Messinias	36.9353	22.2028		Lymberakis, personal database	GPS	1941
Anguis cephallonica	Greece	Messinias	36.8792	22.2829		Lymberakis, personal database	GPS	8943
Anguis cephallonica	Greece	Messinias	37.0925	22.2966		Lymberakis, personal database	GPS	8946
Anguis cephallonica	Greece	Messinias	37.082	22.2122		Lymberakis, personal database	GPS	8950
Anguis cephallonica	Greece	Messinias	36.972	22.268		Lymberakis, personal database	GPS	8951
Anguis cephallonica	Greece	Michas	38.02	21.9	887	Tzoras, personal database	GPS
Anguis cephallonica	Greece	Milea	37.61	22.45	655	Tzoras, Vergetopoulos, Katsiyiannis, Manonas, Karteris, personal database	GPS
Anguis cephallonica	Greece	Mirali	38.11	21.83	736	Tzoras, Galanis, Chiras, personal database	GPS
Anguis cephallonica	Greece	Mirali	38.11	21.85	882	Tzoras, Galanis, Chiras, personal database	GPS
Anguis cephallonica	Greece	Mirali	38.11	21.86	1140	Tzoras, Galanis, Chiras, personal database	GPS
Anguis cephallonica	Greece	Neochori, Taygetos Mts.	37,16	22,25	1338	Thanou et al., 2014	Literature		KJ634794
Anguis cephallonica	Greece	Oitylo	36,72	22,39	493	Strzała et al., 2016	Literature	2269	KU052866
Anguis cephallonica	Greece	Olimpia	37.6393	21.6299		Pabijan, personal database	GPS	MPFC 1996
Anguis cephallonica	Greece	Panorama	37.92	22.27	1146	Tzoras, Manonas, Katsiyiannis, personal database	GPS
Anguis cephallonica	Greece	Patras	38.24	21.77	220	Tzoras, Nanos, personal database	GPS
Anguis cephallonica	Greece	Peloponnese	37,98	22,36	850	iNaturalist, GBIF	GPS
Anguis cephallonica	Greece	Peloponnese	37.07	22.36	610	iNaturalist, GBIF	GPS
Anguis cephallonica	Greece	Peloponnese	37.3	22.24	555	iNaturalist, GBIF	GPS
Anguis cephallonica	Greece	Peloponnese	37.93	22.16	707	iNaturalist, GBIF	GPS
Anguis cephallonica	Greece	Peloponnese	36.93	22.18	380	iNaturalist, GBIF	GPS
Anguis cephallonica	Greece	Perpataris	37.46	22.37	705	Tzoras, Vergetopoulos, Katsiyiannis, Manonas, Karteris, personal database	GPS
Anguis cephallonica	Greece	Pirgaki, Mainalo Mts.	37,63	22,15	1264	Thanou et al., 2014	Literature		KJ634786
Anguis cephallonica	Greece	Pititsa	38.26	21.89	941	Tzoras, Strachinis, Kazilas, Kalaentzis, personal database	GPS
Anguis cephallonica	Greece	Poros	38.1291	20.795	3	Gvoždík, personal database	GPS
Anguis cephallonica	Greece	Poros, Kephallonia Isl.	38,15	20,77	70	Mikulíček et al., 2018	GPS	2023	MG797449
Anguis cephallonica	Greece	Rodia, Kyparissia	37,21	21,73	441	Thanou et al., 2014	Literature		KJ634785
Anguis cephallonica	Greece	Sagkas	37.65	22.46	631	Tzoras, personal database	GPS
Anguis cephallonica	Greece	Salmeniko. Ziria Mts.	38,27	21,95	199	Thanou et al., 2014	Literature		KJ634784
Anguis cephallonica	Greece	Sikionas	37,97	22,70	71	Jablonski, personal database	GPS	2370
Anguis cephallonica	Greece	Skoura	37.01	22.48	157	Tzoras, Vergetopoulos, Protopapas, personal database	GPS
Anguis cephallonica	Greece	Stavros	38.44	20.64	5	Tzoras, Strachinis, personal database	GPS
Anguis cephallonica	Greece	Stymfalia Lake	37,88	22,48	628	Gvoždík et al., 2010	Literature		FJ666587
Anguis cephallonica	Greece	Toskes	38.03	21.73	259	Tzoras, personal database	GPS
Anguis cephallonica	Greece	Tripotama, Erymanthos Mts.	37,86	21,89	610	Thanou et al., 2014	Literature		KJ634789
Anguis cephallonica	Greece	Valtesiniko, Mainalo Mts.	37,68	22,11	1194	Thanou et al., 2014	Literature		KJ634787
Anguis cephallonica	Greece	Vathy, Samos	38.36	20.72	34	Tzoras, Strachinis, personal database	GPS
Anguis cephallonica	Greece	Zakynthou	37.7425	20.8974		Lymberakis, personal database	GPS	10926
Anguis cephallonica	Greece	Zakynthou	37.7262	20.864		Lymberakis, personal database	GPS	10927
Anguis cephallonica	Greece	Zakynthou	37.7811	20.7792		Lymberakis, personal database	GPS	4122, 4265, 5969, 5970, 6684, 7855
Anguis colchica	Armenia	001	40.73	44.79	1785	GBIF	GPS
Anguis colchica	Armenia	002	40.65	44.48	2119	GBIF	GPS
Anguis colchica	Armenia	003	40.02	44.91	1802	GBIF	GPS
Anguis colchica	Armenia	Alaverdi	41.1	44.65	803	Jablonski, personal database	GPS	6624
Anguis colchica	Armenia	Ararat	40	44.9	2091	iNaturalist, GBIF	GPS
Anguis colchica	Armenia	Artavaz	40.63	44.57	2009	GBIF	GPS
Anguis colchica	Armenia	Dilijan	40.75	44.85	1361	Jablonski, personal database	GPS	7596
Anguis colchica	Armenia	Dilijan	40.74	44.85	1265	Jablonski, personal database	GPS	5316
Anguis colchica	Armenia	Dilijan Nature Reserve (Dilijan National Park)	40.6759	45.0272	1620	Sokolov and Syroechkovsky, 1990	Literature
Anguis colchica	Armenia	Dzhalal-Ogly (= Stepanovan)	40.99	44.37	1631	IZANU	GoogleEarth	IZANU 3949
Anguis colchica	Armenia	Gegharkunik	40.65	45.07	1892	iNaturalist, GBIF	GPS
Anguis colchica	Armenia	Khosrov Forest State Reserve	40.0188	44.9994	2251	Sokolov and Syroechkovsky, 1990	Literature
Anguis colchica	Armenia	Khosrovskiy NR	40.03	44.93	1949	IZANU	GoogleEarth	IZANU 3460
Anguis colchica	Armenia	Koroglu mountain slopes	41.2014	44.3052	1542	Muskhelishvili 1970	Literature
Anguis colchica	Armenia	Sverdlov	41.12	44.43	1554	Jablonski, personal database	GPS	6622
Anguis colchica	Armenia	Tavush	40.93	45.39	1139	Jablonski, personal database	GPS	2977
Anguis colchica	Azerbaijan	Almu	38.76	48.54		Sharpilo, 1976	GoogleEarth
Anguis colchica	Azerbaijan	Altiagach district, vicinity of Altiagach village	40.8524	48.9367		Alekperov, 1978	Literature
Anguis colchica	Azerbaijan	Altyagash	40.85	48.93	1200	Alekperov, 1957	GoogleEarth
Anguis colchica	Azerbaijan	Araks River, Ordubad - Karshevan	38.87	46.11	712	Alekperov, 1957	GoogleEarth
Anguis colchica	Azerbaijan	Astara	38.46	48.87	-24	Alekperov, 1957	GoogleEarth
Anguis colchica	Azerbaijan	Astara district, vicinity of Astara city	38.4419	48.873		Alekperov, 1978	Literature
Anguis colchica	Azerbaijan	Astara district, vicinity of Mashkhan village	38.5633	48.7997		ZISP	GPS
Anguis colchica	Azerbaijan	Balaken district, vicinity of Balaken town	41.7413	46.4416		Alekperov, 1978	Literature
Anguis colchica	Azerbaijan	Barzavu	38.76	48.47	1579	Bunyatova, 2012	GoogleEarth
Anguis colchica	Azerbaijan	Belokan	41.72	46.41	378	Alekperov, 1957	GoogleEarth
Anguis colchica	Azerbaijan	Bibiyoni	38.77	48.57	389	Bellati et al., unpublished	Literature
Anguis colchica	Azerbaijan	Bilyasar	38.6	48.73		ZISP	GoogleEarth	ZISP 13123
Anguis colchica	Azerbaijan	Bobla	38.65	48.72	285	Jablonski, personal database	GPS	6486
Anguis colchica	Azerbaijan	Dasdatuk	38.68	48.75		ZISP	GoogleEarth	ZISP 13122
Anguis colchica	Azerbaijan	Dzhagri	39.35	45.41	1085	Alekperov, 1957	GoogleEarth
Anguis colchica	Azerbaijan	Dzhagry (= Dzhakhri)	39.3412	45.4145	1228	Alekperov 1954	Literature
Anguis colchica	Azerbaijan	Gabala region, Gabala city	40.9877	47.8583		Alekperov, 1978	Literature
Anguis colchica	Azerbaijan	Gakh region, Gakh city	41.4256	46.9281		Alekperov, 1978	Literature
Anguis colchica	Azerbaijan	Gamarat	38.648	48.577		ZISP	GoogleEarth	ZISP 11183
Anguis colchica	Azerbaijan	Gamarat [= Hamarat, Amurat]	38.65	48.58	1054	Nikolsky, 1915	GoogleEarth	ZISP 11183
Anguis colchica	Azerbaijan	Geok-Tapy	39.12	48.59	3	Alekperov, 1957	GoogleEarth
Anguis colchica	Azerbaijan	Gyok-Gel Lake	40.41	46.33	1579	Alekperov, 1957	GoogleEarth
Anguis colchica	Azerbaijan	Gyugavar [= Gyulyavar]	38.95	48.46	670	Nikolsky, 1913	GoogleEarth
Anguis colchica	Azerbaijan	Hirkan Natural Park	38.679	48.744		IZANU	GoogleEarth	IZANU 1957
Anguis colchica	Azerbaijan	Hirkan Natural Park	38.68	48.74	107	IZANU	GoogleEarth	IZANU 1957
Anguis colchica	Azerbaijan	Ilisu Nature Reserve	41.4513	47.0309	1429	Sokolov and Syroechkovsky, 1990	Literature
Anguis colchica	Azerbaijan	Ismailli Nature Reserve	40.9338	48.1351	1606	Sokolov and Syroechkovsky, 1990	Literature
Anguis colchica	Azerbaijan	Isti-Su	38.45	48.75	213	Jablonski, personal database	GPS	5321
Anguis colchica	Azerbaijan	Istisu	38.451	48.796	6	ZMMU	GPS	ZMMU 22130
Anguis colchica	Azerbaijan	Istisu	38.45	48.8	6	ZMMU	GoogleEarth	ZMMU 22130
Anguis colchica	Azerbaijan	Kakhi	41.42	46.92	594	Alekperov, 1957	GoogleEarth
Anguis colchica	Azerbaijan	Kemervan	41.06	47.8	1249	Alekperov, 1957	GoogleEarth
Anguis colchica	Azerbaijan	Khachmaz district, vicinity of Khachmaz city	41.489	48.804		Alekperov, 1978	Literature
Anguis colchica	Azerbaijan	Khalakhi Mount	41.69	46.86	2256	Alekperov, 1957	GoogleEarth
Anguis colchica	Azerbaijan	Khashmas	41.47	48.81	30	Alekperov, 1957	GoogleEarth
Anguis colchica	Azerbaijan	Kuba	41.36	48.51	590	Alekperov, 1957	GoogleEarth
Anguis colchica	Azerbaijan	Kusary	41.43	48.44	656	Alekperov, 1957	GoogleEarth
Anguis colchica	Azerbaijan	Kutkashen	41	47.87	940	Alekperov, 1957	GoogleEarth
Anguis colchica	Azerbaijan	Lankaran district, vicinity of Amurat village	38.8499	48.688		ZISP	GPS
Anguis colchica	Azerbaijan	Lankaran district, vicinity of Bilasar village	38.634	48.698		ZISP	GPS
Anguis colchica	Azerbaijan	Lankaran district, vicinity of Lankaran city	38.7724	48.8105		Alekperov, 1978	Literature
Anguis colchica	Azerbaijan	Lankaran-Lerik	38.79	48.47	678	Jablonski, personal database	GPS	5322
Anguis colchica	Azerbaijan	Lenkoran	38.75	48.85		ZISP	GoogleEarth	ZISP 13644
Anguis colchica	Azerbaijan	Lenkoran, 12 km SE	38.63	48.78	100	Litvinchuk, personal database	GoogleEarth
Anguis colchica	Azerbaijan	Lenkoran, 35 km W	38.74	48.64	255	ZISP	GPS	ZISP 22131
Anguis colchica	Azerbaijan	Lerik	38.77	48.4		ZISP	GoogleEarth	ZISP 16086
Anguis colchica	Azerbaijan	Lerik	38.77	48.4	1100	Boettger, 1899	GoogleEarth	ZISP 16086; ZMMU 1887
Anguis colchica	Azerbaijan	Lerik district, Mount Tilau	38.7655	48.3927		Alekperov, 1978	Literature
Anguis colchica	Azerbaijan	Lerik district, vicinity of Lerik city	38.7779	48.4315		Alekperov, 1978	Literature
Anguis colchica	Azerbaijan	Lerik district, vicinity of Siev village	38.6778	48.5993		Alekperov, 1978	Literature
Anguis colchica	Azerbaijan	Lyulyakeran	38.69	48.34	1504	Sobolevsky, 1929	GoogleEarth
Anguis colchica	Azerbaijan	Mashkhan	38.56	48.82	-14	Nikolsky, 1913	GoogleEarth
Anguis colchica	Azerbaijan	Mingeshaur	40.77	47.05	37	Alekperov, 1957	GoogleEarth
Anguis colchica	Azerbaijan	Mount Kushkaya	39.3481	45.562	1589	Tuniyev, unpublished	Literature
Anguis colchica	Azerbaijan	Nukha	41.22	47.18	770	Alekperov, 1957	GoogleEarth
Anguis colchica	Azerbaijan	Oghuz	41.07	47.47	639	Jablonski, personal database	GPS	5326
Anguis colchica	Azerbaijan	Oguz district, Oguz city	41.0721	47.4711		Alekperov, 1978	Literature
Anguis colchica	Azerbaijan	Piran - Didzho	38.68	48.63	350	Matushkina, 2016	GoogleEarth
Anguis colchica	Azerbaijan	Quba district, vicinity of Alekseyevka village	41.3924	48.6035		ZISP	GPS
Anguis colchica	Azerbaijan	Quba district, vicinity of Quba city	41.3519	48.5009		Alekperov, 1978	Literature
Anguis colchica	Azerbaijan	Qusar district, vicinity of Qusar city	41.4181	48.4471		Alekperov, 1978	Literature
Anguis colchica	Azerbaijan	Shahagash	38.58	48.85	-24	Nikolsky, 1913	GoogleEarth	ZISP 11049
Anguis colchica	Azerbaijan	Shaykendskiy fishery farm	40.42	46.33	1579	Alekperov, 1957	GoogleEarth
Anguis colchica	Azerbaijan	Shefekli	38.901	48.155		IZANU	GoogleEarth	IZANU 144
Anguis colchica	Azerbaijan	Shefekli	38.9	48.16	1006	IZANU	GoogleEarth	IZANU 144
Anguis colchica	Azerbaijan	Shemakha	40.63	48.64	652	Alekperov, 1957	GoogleEarth
Anguis colchica	Azerbaijan	Shemakha district, vicinity of Koleibugurd village	40.7592	48.5604		Alekperov, 1978	Literature
Anguis colchica	Azerbaijan	Shemakha district, vicinity of Shamakhi city	40.6568	48.6282		Alekperov, 1978	Literature
Anguis colchica	Azerbaijan	Shinsharshay River	41.65	46.71	808	Alekperov, 1957	GoogleEarth
Anguis colchica	Azerbaijan	Shuvi	38.493	48.76		Sharpilo, 1976	GoogleEarth
Anguis colchica	Azerbaijan	Shuvi	38.49	48.76	60	Sharpilo, 1976	GoogleEarth
Anguis colchica	Azerbaijan	Siov	38.673	48.591		ZISP	GoogleEarth	ZISP 4509
Anguis colchica	Azerbaijan	Siov	38.67	48.59	985	Alekperov, 1957	GoogleEarth	ZISP 4509
Anguis colchica	Azerbaijan	Sım	38.68	48.6	974	Bellati et al., unpublished	Literature	ZMMU R13079; 6667, 6668
Anguis colchica	Azerbaijan	Sym	38.48	48.63	480	ZMMU	GPS	ZMMU R-13079
Anguis colchica	Azerbaijan	Tatev monastery	39.37	46.25	1527	iNaturalist, GBIF	GPS
Anguis colchica	Azerbaijan	Tsivi-Tskaro	41.32	45.25	246	Alekperov, 1957	GoogleEarth
Anguis colchica	Azerbaijan	Ulasy Ridge	38.62	48.72		ZMMU	GoogleEarth	ZMMU 3066
Anguis colchica	Azerbaijan	Vartashen	41.07	47.46	724	Alekperov, 1957	GoogleEarth
Anguis colchica	Azerbaijan	Vazazamin	38.77	48.52		Sharpilo, 1976	GoogleEarth
Anguis colchica	Azerbaijan	Verkhnie Dzhary	41.66	46.67	725	Alekperov, 1957	GoogleEarth
Anguis colchica	Azerbaijan	Xocalı (Nagorno-Karabakh)	39.75	46.76	206	iNaturalist, GBIF	GPS
Anguis colchica	Azerbaijan	Yardymly	38.9	48.25		Sharpilo, 1976	GoogleEarth
Anguis colchica	Azerbaijan	Zagatala district, Car village	41.6671	46.6746		Alekperov, 1978	Literature
Anguis colchica	Azerbaijan	Zagatala district, Mount Halakhi	41.7101	46.8848		Alekperov, 1978	Literature
Anguis colchica	Azerbaijan	Zagatala Nature Reserve	41.7343	46.606	1010	Sokolov and Syroechkovsky, 1990	Literature
Anguis colchica	Azerbaijan	Zurnabad	40.5	46.24	967	Alekperov, 1957	GoogleEarth
Anguis colchica	Belarus	34UFC4	51.6458	23.5843		Sillero et al., 2014	Centre grid
Anguis colchica	Belarus	34UFD4	52.5446	23.6063		Sillero et al., 2014	Centre grid
Anguis colchica	Belarus	35ULU1	52.994	24.3823		Sillero et al., 2014	Centre grid
Anguis colchica	Belarus	35ULU2	52.5446	24.3937		Sillero et al., 2014	Centre grid
Anguis colchica	Belarus	35ULV1	53.8925	24.3584		Sillero et al., 2014	Centre grid
Anguis colchica	Belarus	35ULV3	53.9081	25.0971		Sillero et al., 2014	Centre grid
Anguis colchica	Belarus	35ULV4	53.459	25.1173		Sillero et al., 2014	Centre grid
Anguis colchica	Belarus	35UMA3	54.8213	26.6109		Sillero et al., 2014	Centre grid
Anguis colchica	Belarus	35UMT1	52.1202	25.9045		Sillero et al., 2014	Centre grid
Anguis colchica	Belarus	35UMT3	52.1248	26.6348		Sillero et al., 2014	Centre grid
Anguis colchica	Belarus	35UMU1	53.0191	25.8819		Sillero et al., 2014	Centre grid
Anguis colchica	Belarus	35UMU3	53.0238	26.6273		Sillero et al., 2014	Centre grid
Anguis colchica	Belarus	35UMU4	52.5743	26.6311		Sillero et al., 2014	Centre grid
Anguis colchica	Belarus	35UMV1	53.9178	25.858		Sillero et al., 2014	Centre grid
Anguis colchica	Belarus	35UNA2	54.372	27.3848		Sillero et al., 2014	Centre grid
Anguis colchica	Belarus	35UNA3	54.8163	28.1672		Sillero et al., 2014	Centre grid
Anguis colchica	Belarus	35UNB2	55.2706	27.3935		Sillero et al., 2014	Centre grid
Anguis colchica	Belarus	35UNB3	55.7147	28.1938		Sillero et al., 2014	Centre grid
Anguis colchica	Belarus	35UNB4	55.2655	28.1803		Sillero et al., 2014	Centre grid
Anguis colchica	Belarus	35UNT1	52.1248	27.3652		Sillero et al., 2014	Centre grid
Anguis colchica	Belarus	35UNT3	52.1202	28.0955		Sillero et al., 2014	Centre grid
Anguis colchica	Belarus	35UNU3	53.0191	28.1181		Sillero et al., 2014	Centre grid
Anguis colchica	Belarus	35UNU4	52.5697	28.1066		Sillero et al., 2014	Centre grid
Anguis colchica	Belarus	35UNV3	53.9178	28.142		Sillero et al., 2014	Centre grid
Anguis colchica	Belarus	35UPB1	55.7044	28.9893		Sillero et al., 2014	Centre grid
Anguis colchica	Belarus	35UPB2	55.2554	28.9668		Sillero et al., 2014	Centre grid
Anguis colchica	Belarus	35UPB3	55.6891	29.6934		Sillero et al., 2014	Centre grid
Anguis colchica	Belarus	35UPB4	55.2401	29.6799		Sillero et al., 2014	Centre grid
Anguis colchica	Belarus	35UPT3	52.0952	29.5951		Sillero et al., 2014	Centre grid
Anguis colchica	Belarus	35UPU1	53.0097	28.8631		Sillero et al., 2014	Centre grid
Anguis colchica	Belarus	35UPV2	53.459	28.8827		Sillero et al., 2014	Centre grid
Anguis colchica	Belarus	36UUD2	52.5446	30.3937		Sillero et al., 2014	Centre grid
Anguis colchica	Belarus	36UUD4	52.5605	31.156		Sillero et al., 2014	Centre grid
Anguis colchica	Belarus	36UUE4	53.459	31.1173		Sillero et al., 2014	Centre grid
Anguis colchica	Belarus	36UUF1	54.7909	30.3332		Sillero et al., 2014	Centre grid
Anguis colchica	Belarus	Ambrosenki	55.69	27.83	132	Pikulik et al., 1988	GoogleEarth
Anguis colchica	Belarus	Baranovichi	53.15	26.06	187	Pikulik et al., 1988	GoogleEarth
Anguis colchica	Belarus	Belowezskaya Pushcha	52.62	23.88	177	GBIF	GPS
Anguis colchica	Belarus	Berezinsky BSP	54.78	28.28	25	iNaturalist, GBIF	GPS
Anguis colchica	Belarus	Beroza	52.54	24.99	143	Pikulik et al., 1988	GoogleEarth
Anguis colchica	Belarus	Beshenkovichi	55.06	29.5	141	Pikulik et al., 1988	GoogleEarth
Anguis colchica	Belarus	Bobruisk	53.16	29.24	132	Pikulik et al., 1988	GoogleEarth
Anguis colchica	Belarus	Borisov	54.23	28.43	170	Pikulik et al., 1988	GoogleEarth
Anguis colchica	Belarus	Borovka	54.95	28.82	174	Pikulik et al., 1988	GoogleEarth
Anguis colchica	Belarus	Braslav	55.65	27.04	133	Pikulik et al., 1988	GoogleEarth
Anguis colchica	Belarus	Braslavsky district	55.6	26.8	172	Pikulik et al., 1988	GoogleEarth
Anguis colchica	Belarus	Braslaw	55.61	26.94	100	iNaturalist, GBIF	GPS
Anguis colchica	Belarus	Buda Gresskaya	53.28	27.54	177	GBIF	GPS
Anguis colchica	Belarus	Dmitrovichi	52.51	23.78	174	Pikulik et al., 1988	GoogleEarth
Anguis colchica	Belarus	Domgeritsy	54.77	28.29	177	GBIF	GPS
Anguis colchica	Belarus	Gomel	52.4	30.88	141	Pikulik et al., 1988	GoogleEarth
Anguis colchica	Belarus	Gurki	55.77	29.96	187	Pikulik et al., 1988	GoogleEarth
Anguis colchica	Belarus	Kamenets district	52.57	23.78	165	GBIF	GPS
Anguis colchica	Belarus	Kamyanyets	52.58	23.79	210	iNaturalist, GBIF	GPS
Anguis colchica	Belarus	Krasnoluki	54.64	28.85	217	Pikulik et al., 1988	GoogleEarth
Anguis colchica	Belarus	Krichev	53.7	31.76	161	Pikulik et al., 1988	GoogleEarth
Anguis colchica	Belarus	Lepel	54.86	28.65	159	Pikulik et al., 1988	GoogleEarth
Anguis colchica	Belarus	Lida	53.91	25.31	157	Pikulik et al., 1988	GoogleEarth
Anguis colchica	Belarus	Mazyr	52.02	29.27	177	Pikulik et al., 1988	GoogleEarth
Anguis colchica	Belarus	Minsk	53.96	27.47	215	Pikulik et al., 1988	GoogleEarth
Anguis colchica	Belarus	Mogilev	53.88	30.44	157	Pikulik et al., 1988	GoogleEarth
Anguis colchica	Belarus	Molodechno	54.34	26.84	163	Pikulik et al., 1988	GoogleEarth
Anguis colchica	Belarus	Mozyr	52.04	29.26	155	IZANU	GoogleEarth	IZANU 3955
Anguis colchica	Belarus	near lake Naroch	54.81	26.82	162	Pikulik et al., 1988	GoogleEarth
Anguis colchica	Belarus	Novoselki	53.49	28.97	148	Pikulik et al., 1988	GoogleEarth
Anguis colchica	Belarus	Orsha	54.56	30.42	175	Pikulik et al., 1988	GoogleEarth
Anguis colchica	Belarus	Ostrovno	55.09	29.72	143	Pikulik et al., 1988	GoogleEarth
Anguis colchica	Belarus	Pinsk	52.14	26.05	155	Pikulik et al., 1988	GoogleEarth
Anguis colchica	Belarus	Polotsk	55.52	28.81	142	Pikulik et al., 1988	GoogleEarth
Anguis colchica	Belarus	Popovtsy	53.17	27.32	193	GBIF	GPS
Anguis colchica	Belarus	Porechye	53.77	53.77	133	Pikulik et al., 1988	GoogleEarth
Anguis colchica	Belarus	Rechitsa	52.36	30.32	140	Pikulik et al., 1988	GoogleEarth
Anguis colchica	Belarus	Shchitovka	54.86	30.41	179	ZMMU	GPS	ZMMU 8185/1; 6656
Anguis colchica	Belarus	Slutsk	52.99	27.54	147	Pikulik et al., 1988	GoogleEarth
Anguis colchica	Belarus	Tihovola	52.88	24	165	GBIF	GPS
Anguis colchica	Belarus	Uzda District	53.54	26.96	175	iNaturalist, GBIF	GPS
Anguis colchica	Belarus	Vitebsk	55.12	30.18	168	Pikulik et al., 1988	GoogleEarth
Anguis colchica	Belarus	Vitebsk region	55.24	30.17	165	iNaturalist, GBIF	GPS
Anguis colchica	Belarus	Volkovysk	53.15	24.5	195	Pikulik et al., 1988	GoogleEarth
Anguis colchica	Belarus	Zhlobin	52.92	30.03	129	Pikulik et al., 1988	GoogleEarth
Anguis colchica	Bulgaria	35TLJ4	43.5673	25.4521		Sillero et al., 2014	Centre grid
Anguis colchica	Bulgaria	35TLJ4	43.5173	25.6558		Sillero et al., 2014	Centre grid
Anguis colchica	Bulgaria	35TMJ1	43.8432	25.9426		Sillero et al., 2014	Centre grid
Anguis colchica	Bulgaria	35TMJ2	43.5751	26.195		Sillero et al., 2014	Centre grid
Anguis colchica	Bulgaria	35TMJ2	43.587	25.9465		Sillero et al., 2014	Centre grid
Anguis colchica	Bulgaria	35TMJ4	43.7576	26.6894		Sillero et al., 2014	Centre grid
Anguis colchica	Bulgaria	35TNG1	42.4065	27.4253		Sillero et al., 2014	Centre grid
Anguis colchica	Bulgaria	35TNG2	41.9557	27.543		Sillero et al., 2014	Centre grid
Anguis colchica	Bulgaria	35TNG3	42.0444	27.7854		Sillero et al., 2014	Centre grid
Anguis colchica	Bulgaria	35TNG3	42.1352	27.6655		Sillero et al., 2014	Centre grid
Anguis colchica	Bulgaria	35TNG3	42.2245	27.7876		Sillero et al., 2014	Centre grid
Anguis colchica	Bulgaria	35TNG3	42.0899	27.6972		Sillero et al., 2014	Centre grid
Anguis colchica	Bulgaria	35TNG3	42.3257	27.7047		Sillero et al., 2014	Centre grid
Anguis colchica	Bulgaria	35TNH1	43.217	27.4309		Sillero et al., 2014	Centre grid
Anguis colchica	Bulgaria	35TNH1	43.2753	27.0071		Sillero et al., 2014	Centre grid
Anguis colchica	Bulgaria	35TNH3	43.2141	27.9234		Sillero et al., 2014	Centre grid
Anguis colchica	Bulgaria	35TNH3	43.303	28.048		Sillero et al., 2014	Centre grid
Anguis colchica	Bulgaria	35TNH3	43.3041	27.9247		Sillero et al., 2014	Centre grid
Anguis colchica	Bulgaria	35TNJ1	43.8477	27.311		Sillero et al., 2014	Centre grid
Anguis colchica	Bulgaria	Balgarevo	43.4	28.46		Beschkov, 1966	GoogleEarth
Anguis colchica	Bulgaria	Bežanovo	43.2288	24.3985	142	Balcanica.info database	GPS
Anguis colchica	Bulgaria	Botevgrad	42.99	23.57	1475	iNaturalist, GBIF	GPS
Anguis colchica	Bulgaria	Bozhenitsa	43	23.8	295	Jablonski et al., 2016	Literature	685	KX020147
Anguis colchica	Bulgaria	Brodilovo pass	42.11	27.83	270	Jablonski et al., 2016	Literature	805	KX020148
Anguis colchica	Bulgaria	Bulgarka natural park	42.79	25.18	1264	Jablonski, personal database	GPS	2516
Anguis colchica	Bulgaria	Bulgarka natural park	42.79	25.3	673	Jablonski, personal database	GPS	2517
Anguis colchica	Bulgaria	Dolna Studena	43.5234	25.7118	25	Jablonski, personal database	GPS
Anguis colchica	Bulgaria	Eliseina	43.07	23.49	573	Jablonski, personal database	GPS	2509
Anguis colchica	Bulgaria	Gara Lakatnik	43.0935	23.3712		Vergilov, personal database	GPS
Anguis colchica	Bulgaria	Garvan	44.12	26.89	12	Jablonski et al., 2016	Literature	681	KX020149
Anguis colchica	Bulgaria	Glozhene	42.9677	24.148		Vergilov, personal database	GPS
Anguis colchica	Bulgaria	Gramatikovo	42.03	27.63	62	Jablonski et al., 2016	Literature	813	KX020151
Anguis colchica	Bulgaria	Hristo Danovo	42.72	24.6	577	GBIF	GPS
Anguis colchica	Bulgaria	Hristo Danovo	42.73	24.6	608	CAS	GPS	CAS 207074
Anguis colchica	Bulgaria	Cherni osam, Stara Planina	42.79	24.7958		Vergilov, personal database	GPS
Anguis colchica	Bulgaria	Izgrev	42.12	27.77	217	Jablonski et al., 2016	Literature	806	KX020152
Anguis colchica	Bulgaria	Jambol	42.49	26.46		Beschkov, 1966	GoogleEarth
Anguis colchica	Bulgaria	Karlukovo	43.18	24.05	175	Jablonski, personal database	GPS	2514
Anguis colchica	Bulgaria	Karlukovo	43.17	24.07	238	Jablonski, personal database	GPS	2520
Anguis colchica	Bulgaria	Kitka-Primorsko	42.3	27.75	82	Jablonski, personal database	GPS	2614
Anguis colchica	Bulgaria	Kondolovo	42.1	27.65	287	Jablonski et al., 2016	Literature	811	KX020153
Anguis colchica	Bulgaria	Koshov	43.65	26		Balcanica.info database	GPS
Anguis colchica	Bulgaria	Kotel	42.8908	26.4301	600	Balej, personal database	GPS
Anguis colchica	Bulgaria	Lakatnik	43.08	23.37	569	Jablonski, personal database	GPS	2512
Anguis colchica	Bulgaria	Letnitsa	43.31	25.13	106	Jablonski et al., 2016	Literature	688	KX020154
Anguis colchica	Bulgaria	Malko Tarnovo	41.97	27.48	571	Jablonski, personal database	GPS	823
Anguis colchica	Bulgaria	Mezdra	43.13	23.7	328	Jablonski, personal database	GPS	2497
Anguis colchica	Bulgaria	Milanovo	43.12	23.39	830	CAS	GPS	CAS 215244
Anguis colchica	Bulgaria	Mladežko	42.16	27.43	266	Jablonski et al., 2016	Literature	835	KX020156
Anguis colchica	Bulgaria	Obština Carevo, Bulharsko	42.06	27.94	62	iNaturalist, GBIF	GPS
Anguis colchica	Bulgaria	Osenovo	43.3055	28.0391		Vergilov, personal database	GPS
Anguis colchica	Bulgaria	Park Rosenec	42.43	27.54	13	Jablonski et al., 2016	Literature	847	KX020157
Anguis colchica	Bulgaria	Pass to Slivarovo	41.99	27.58	478	Jablonski et al., 2016	Literature	818	KX020158
Anguis colchica	Bulgaria	Patresh	43.31	25.35	170	Jablonski et al., 2016	Literature	689	KX020160
Anguis colchica	Bulgaria	Pleven	43.28	24.65	304	Jablonski et al., 2016	Literature	676	KX020172
Anguis colchica	Bulgaria	Pravetz	42.89	23.91	482	Jablonski et al., 2016	Literature		KX020161
Anguis colchica	Bulgaria	Pravetz	42.9	23.92	410	Jablonski et al., 2016	Literature	522	KX020162
Anguis colchica	Bulgaria	Primorsko	42.3	27.74	63	iNaturalist, GBIF	GPS
Anguis colchica	Bulgaria	Primorsko - Kiten	42.25	27.74	1	Jablonski, personal database	GPS	890
Anguis colchica	Bulgaria	Ropotamo	42.3	27.73	14	Jablonski et al., 2016	Literature	599	KX020163
Anguis colchica	Bulgaria	Ropotamo	42.29	27.73	54	Jablonski, personal database	GPS	2612
Anguis colchica	Bulgaria	Rosen	42.39	27.59	126	Jablonski, personal database	GPS	891
Anguis colchica	Bulgaria	Shipka	42.75	25.31	1025	Jablonski et al., 2016	Literature		KX020164
Anguis colchica	Bulgaria	Shipka pass	42.76	25.32	1242	Jablonski et al., 2016	Literature	480	KX020165
Anguis colchica	Bulgaria	Shumen	43.27	26.9	374	Jablonski et al., 2016	Literature	588	KX020167
Anguis colchica	Bulgaria	Sinagovtsi	43.89	22.75	66	Jablonski et al., 2016	Literature		KX020168
Anguis colchica	Bulgaria	Sinemorec	42.06	27.97	39	Jablonski et al., 2016	Literature	321	KX020171
Anguis colchica	Bulgaria	Sinemorec	42.07	27.96	50	Jablonski, personal database	GPS	1418
Anguis colchica	Bulgaria	Slavyani	43.27	24.65	345	Jablonski et al., 2016	Literature		KX020172
Anguis colchica	Bulgaria	Srebarna	44.07	27.04	76	Jablonski et al., 2016	Literature	680	KX020174
Anguis colchica	Bulgaria	Stomoplo	42.29	27.75	64	iNaturalist, GBIF	GPS
Anguis colchica	Bulgaria	Strandza. Reserve Silkosia	42.08	27.74	246	Jablonski et al., 2016	Literature	687	KX020175
Anguis colchica	Bulgaria	Svistov	43.6	25.38	125	Jablonski, personal database	GPS	2610
Anguis colchica	Bulgaria	Targovišče	43.54	22.74	334	Jablonski et al., 2016	Literature	1048	KX020176
Anguis colchica	Bulgaria	Triyavna	42.86	25.49	528	Jablonski et al., 2016	Literature	673	KX020177
Anguis colchica	Bulgaria	Veleka	42.05	27.92	65	Jablonski, personal database	GPS	2515
Anguis colchica	Bulgaria	Vodnite Lilii	42.3	27.7	25	Jablonski, personal database	GPS	2519
Anguis colchica	Bulgaria	Zvezdets	42.11	27.41	399	Jablonski, personal database	GPS	2501
Anguis colchica	Bulgaria		43.1883	23.5142		Balej, personal database	GPS
Anguis colchica	Bulgaria		43.1911	23.5353		Balej, personal database	GPS
Anguis colchica	Bulgaria		42.79	25.031		Jablonski, personal database	GPS
Anguis colchica	Bulgaria		42.2093	26.9939		Bogaerts, personal database	GPS
Anguis colchica	Czech Republic	Bílá	49.44	18.45	613	Sifrova et al., unpublished	GPS	A384
Anguis colchica	Czech Republic	Bílé Karpaty	49.03	18.05	442	Jablonski, personal database	GPS	7494
Anguis colchica	Czech Republic	Bohumín	49.92	18.33	199	Jablonski, personal database	GPS	8971
Anguis colchica	Czech Republic	Budišovice	49.86	18.03	352	Sifrova et al., unpublished	GPS	44
Anguis colchica	Czech Republic	Bystřička	49.42	17.95	415	Sifrova et al., unpublished	GPS	A405
Anguis colchica	Czech Republic	Čeladná	49.55	18.34	426	Sifrova et al., unpublished	GPS	A386
Anguis colchica	Czech Republic	Dobroslavice	49.88	18.16	221	Jablonski, personal database	GPS	6434
Anguis colchica	Czech Republic	Emauzy	49.62	17.82	318	Sifrova et al., unpublished	GPS	A226
Anguis colchica	Czech Republic	Grúň pod Velkou Javořinou	48.9	17.79	660	Sifrova et al., unpublished	GPS	A419
Anguis colchica	Czech Republic	Grúň pod Velkou Javořinou	48.89	17.75	501	Sifrova et al., unpublished	GPS	A421
Anguis colchica	Czech Republic	Halenkov	49.32	18.14	448	Sifrova et al., unpublished	GPS	2059
Anguis colchica	Czech Republic	Hlubočec	49.83	17.98	444	Sifrova et al., unpublished	GPS	A211
Anguis colchica	Czech Republic	Hlubočec	49.83	17.99	427	Sifrova et al., unpublished	GPS	A212
Anguis colchica	Czech Republic	Hostětín	49.05	17.88	379	Gvoždík et al., 2010	Literature		FJ666577
Anguis colchica	Czech Republic	Hostýnské vrchy	49.38	17.71	542	Sifrova et al., unpublished	GPS	A367
Anguis colchica	Czech Republic	Hostýnské vrchy	49.38	17.7	631	Sifrova et al., unpublished	GPS	A368
Anguis colchica	Czech Republic	Hostýnské vrchy	49.37	17.7	616	Sifrova et al., unpublished	GPS	A370
Anguis colchica	Czech Republic	Hrabůvka	49.57	17.68	317	Sifrova et al., unpublished	GPS	A180
Anguis colchica	Czech Republic	Hrabůvka	49.57	17.67	316	Sifrova et al., unpublished	GPS	A181
Anguis colchica	Czech Republic	Hukvaldy	49.63	18.23	358	Sifrova et al., unpublished	GPS	A396
Anguis colchica	Czech Republic	Hukvaldy	49.62	18.22	341	Sifrova et al., unpublished	GPS	A397
Anguis colchica	Czech Republic	Huslenky	49.32	18.09	631	Jablonski, personal database	GPS	4992
Anguis colchica	Czech Republic	Hutisko-Solanec	49.41	18.27	840	iNaturalist, GBIF	GPS
Anguis colchica	Czech Republic	Hynčice	49.63	17.83	325	Sifrova et al., unpublished	GPS	A257
Anguis colchica	Czech Republic	Javorový vrch	49.6	18.63	631	Sifrova et al., unpublished	GPS	A098
Anguis colchica	Czech Republic	Karolinka	49.35	18.23	477	Sifrova et al., unpublished	GPS	A002
Anguis colchica	Czech Republic	Karviná - Ráj	49.86	18.58	266	Jablonski, personal database	GPS	9113
Anguis colchica	Czech Republic	Karviná-Ráj	49.85	18.58	298	Jablonski, personal database	GPS	715
Anguis colchica	Czech Republic	Kunčice pod Ondřejníkem	49.55	18.29	634	Sifrova et al., unpublished	GPS	A398
Anguis colchica	Czech Republic	Kunčice pod Ondřejníkem	49.54	18.29	508	Sifrova et al., unpublished	GPS	A387
Anguis colchica	Czech Republic	Makyta	49.27	18.17	678	Sifrova et al., unpublished	GPS	A408
Anguis colchica	Czech Republic	Mankovice	49.64	17.87	281	Sifrova et al., unpublished	GPS	A227
Anguis colchica	Czech Republic	Mankovice	49.64	17.85	285	Sifrova et al., unpublished	GPS	A228
Anguis colchica	Czech Republic	Myslík, Palkovice	49.6	18.25	428	iNaturalist, GBIF	GPS
Anguis colchica	Czech Republic	Oldřichovice	49.63	18.65	522	Sifrova et al., unpublished	GPS	A135
Anguis colchica	Czech Republic	Oldřichovice	49.63	18.65	400	Jablonski & Meduna, 2010	GPS
Anguis colchica	Czech Republic	Olšovec	49.6	17.71	375	Sifrova et al., unpublished	GPS	A224
Anguis colchica	Czech Republic	Ostrava	49.81	18.19	233	Sifrova et al., unpublished	GPS	A210
Anguis colchica	Czech Republic	Ostravice	49.52	18.38	670	Sifrova et al., unpublished	GPS	A099
Anguis colchica	Czech Republic	Ostravice	49.54	18.4	510	Sifrova et al., unpublished	GPS	A473
Anguis colchica	Czech Republic	Otice	49.91	17.86	285	Sifrova et al., unpublished	GPS	A208
Anguis colchica	Czech Republic	Partutovice	49.65	17.71	584	Sifrova et al., unpublished	GPS	A225
Anguis colchica	Czech Republic	Slušovice	49.25	17.8	285	Sifrova et al., unpublished	GPS	A424
Anguis colchica	Czech Republic	Štramberk	49.58	18.1	344	Gvoždík et al., 2010	Literature		FJ666578
Anguis colchica	Czech Republic	Štramberk	49.59	18.12	452	Sifrova et al., unpublished	GPS	A345
Anguis colchica	Czech Republic	Tichov	49.17	17.98	433	Jablonski, personal database	GPS	2058
Anguis colchica	Czech Republic	Třinec	49.68	18.7	427	Sifrova et al., unpublished	GPS	A136
Anguis colchica	Czech Republic	Uherský Brod	49.02	17.67	218	Sifrova et al., unpublished	GPS	A423
Anguis colchica	Czech Republic	Velké Karlovice	49.38	18.32	749	Sifrova et al., unpublished	GPS	A406
Anguis colchica	Czech Republic	Velké Karlovice	49.38	18.31	639	Sifrova et al., unpublished	GPS	A407
Anguis colchica	Czech Republic	Vendryně	49.67	18.75	565	Sifrova et al., unpublished	GPS	A409
Anguis colchica	Czech Republic	Vražné	49.62	17.86	290	Sifrova et al., unpublished	GPS	A213
Anguis colchica	Czech Republic	Vyškovec	48.94	17.85	612	Sifrova et al., unpublished	GPS	A420
Anguis colchica	Czech Republic	Zlín	49.03	18.05	341	iNaturalist, GBIF	GPS
Anguis colchica	Estonia	Harju maakond, Anija vald, Kaunissaare küla	59.3	25.4	175	GBIF	GPS
Anguis colchica	Estonia	Harju maakond, Anija vald, Mustjõe küla	59.3	25.6	74	GBIF	GPS
Anguis colchica	Estonia	Harju maakond, Anija vald, Pillapalu küla	59.3	25.7	83	GBIF	GPS
Anguis colchica	Estonia	Harju maakond, Anija vald, Vetla küla	59.2	25.5	85	GBIF	GPS
Anguis colchica	Estonia	Harju maakond, Harku vald, Vääna küla	59.4	24.4	31	GBIF	GPS
Anguis colchica	Estonia	Harju maakond, Jõelähtme vald, Neeme küla	59.5	25.2	17	GBIF	GPS
Anguis colchica	Estonia	Harju maakond, Kose vald, Tammiku küla	59.2	24.9	68	GBIF	GPS
Anguis colchica	Estonia	Harju maakond, Kose vald, Tuhala küla	59.2	25	67	GBIF	GPS
Anguis colchica	Estonia	Harju maakond, Kuusalu vald, Kalme küla	59.5	25.7	60	GBIF	GPS
Anguis colchica	Estonia	Harju maakond, Kuusalu vald, Koitjärve küla	59.4	25.7	79	GBIF	GPS
Anguis colchica	Estonia	Harju maakond, Kuusalu vald, Nõmmeveski küla	59.5	25.8	77	GBIF	GPS
Anguis colchica	Estonia	Harju maakond, Kuusalu vald, Pudisoo küla	59.5	25.6	27	GBIF	GPS
Anguis colchica	Estonia	Harju maakond, Kuusalu vald, Sigula küla	59.4	25.6	79	GBIF	GPS
Anguis colchica	Estonia	Harju maakond, Lääne-Harju vald, Kasepere küla	59.2	24.1	34	GBIF	GPS
Anguis colchica	Estonia	Harju maakond, Lääne-Harju vald, Niitvälja küla	59.3	24.3	40	GBIF	GPS
Anguis colchica	Estonia	Harju maakond, Raasiku vald, Mallavere küla	59.3	25.1	48	GBIF	GPS
Anguis colchica	Estonia	Harju maakond, Saue vald, Kernu küla	59.1	24.5	60	GBIF	GPS
Anguis colchica	Estonia	Harju maakond, Saue vald, Lepaste küla	59.1	24.2	46	GBIF	GPS
Anguis colchica	Estonia	Ida-Viru maakond, Alutaguse vald, Konsu küla	59.2	27.6	54	GBIF	GPS
Anguis colchica	Estonia	Ida-Viru maakond, Alutaguse vald, Vasavere küla	59.3	27.6	48	GBIF	GPS
Anguis colchica	Estonia	Järva maakond, Järva vald, Mägede küla	59.2	25.6	84	GBIF	GPS
Anguis colchica	Estonia	Kuusalu vald	59.35	25.66	92	GBIF	GPS
Anguis colchica	Estonia	Lääne maakond, Lääne-Nigula vald, Jaakna küla	59	24	43	GBIF	GPS
Anguis colchica	Estonia	Lääne maakond, Lääne-Nigula vald, Rõuma küla	59	24.1	42	GBIF	GPS
Anguis colchica	Estonia	Lääne maakond, Lääne-Nigula vald, Rõuma küla	59	24.1	43	GBIF	GPS
Anguis colchica	Estonia	Lääne-Viru maakond, Haljala vald, Altja küla	59.6	26.1	4	GBIF	GPS
Anguis colchica	Estonia	Lahemaa National Park, Vihula, Lääne-Virumaa	59.5	25.82	70	GBIF	GPS
Anguis colchica	Estonia	Põlva maakond, Kanepi vald, Ihamaru küla	58.1	26.9	89	GBIF	GPS
Anguis colchica	Estonia	Põlva maakond, Räpina vald, Nohipalo küla	57.9	27.3	80	GBIF	GPS
Anguis colchica	Estonia	Põlva maakond, Räpina vald, Verioramõisa küla	58	27.3	68	GBIF	GPS
Anguis colchica	Estonia	Rapla maakond, Märjamaa vald, Rangu küla	59	24.4	58	GBIF	GPS
Anguis colchica	Estonia	Rapla maakond, Rapla vald, Lipametsa küla	58.9	24.7	62	GBIF	GPS
Anguis colchica	Estonia	Rapla maakond, Rapla vald, Loe küla	58.9	24.6	48	GBIF	GPS
Anguis colchica	Estonia	Rohuküla	58.911	23.445		Gvoždík et al., 2021 unpublished	GPS	TP1904
Anguis colchica	Estonia	Tartu maakond, Kastre vald, Järvselja küla	58.3	27.3	34	GBIF	GPS
Anguis colchica	Estonia	Tartu maakond, Peipsiääre vald, Vea küla	58.6	26.9	63	GBIF	GPS
Anguis colchica	Estonia	Vinni vald	59.17	26.56	113	GBIF	GPS
Anguis colchica	Estonia	Võru maakond, Antsla vald, Ruhingu küla	57.9	26.6	136	GBIF	GPS
Anguis colchica	Estonia	Võru maakond, Antsla vald, Ruhingu küla	57.9	26.6	141	GBIF	GPS
Anguis colchica	Estonia	Võru maakond, Antsla vald, Ruhingu küla	57.9	26.7	118	GBIF	GPS
Anguis colchica	Estonia	Võru maakond, Rõuge vald, Kängsepä küla	57.7	26.8	124	GBIF	GPS
Anguis colchica	Estonia	Võru maakond, Rõuge vald, Palli kül	57.6	27	184	GBIF	GPS
Anguis colchica	Estonia	Võru maakond, Rõuge vald, Parmu küla	57.5	27.3	171	GBIF	GPS
Anguis colchica	Estonia	Võru maakond, Setomaa vald, Kiiova küla	57.8	27.5	108	GBIF	GPS
Anguis colchica	Estonia	Võru maakond, Setomaa vald, Õrsava küla	57.9	27.6	53	GBIF	GPS
Anguis colchica	Finland	001	62.48	21.17	4	GBIF	GPS
Anguis colchica	Finland	002	59.96	23.36	31	GBIF	GPS
Anguis colchica	Finland	003	60.66	23.75	138	GBIF	GPS
Anguis colchica	Finland	004	61.45	22.86	126	GBIF	GPS
Anguis colchica	Finland	005	60.47	24.75	83	GBIF	GPS
Anguis colchica	Finland	007	61.98	29.05	89	GBIF	GPS
Anguis colchica	Finland	008	60.32	24.97	52	GBIF	GPS
Anguis colchica	Finland	009	61.84	28.72	100	GBIF	GPS
Anguis colchica	Finland	010	61.86	28.69	121	GBIF	GPS
Anguis colchica	Finland	011	60.46	22.73	52	GBIF	GPS
Anguis colchica	Finland	012	60.68	24.25	121	GBIF	GPS
Anguis colchica	Finland	013	60.5	27.62	8	GBIF	GPS
Anguis colchica	Finland	014	60.66	23.61	109	GBIF	GPS
Anguis colchica	Finland	015	60.39	23.94	66	GBIF	GPS
Anguis colchica	Finland	016	60.13	24.72	4	GBIF	GPS
Anguis colchica	Finland	017	60.68	22.32	85	GBIF	GPS
Anguis colchica	Finland	018	61.72	24.15	158	GBIF	GPS
Anguis colchica	Finland	019	60.32	24.67	56	GBIF	GPS
Anguis colchica	Finland	020	60.65	22.52	64	GBIF	GPS
Anguis colchica	Finland	021	60.65	22.2	55	GBIF	GPS
Anguis colchica	Finland	022	60.37	22.33	40	GBIF	GPS
Anguis colchica	Finland	023	61.82	26.19	116	GBIF	GPS
Anguis colchica	Finland	024	60.05	24.54	12	GBIF	GPS
Anguis colchica	Finland	025	60.65	22.31	67	GBIF	GPS
Anguis colchica	Finland	026	60.67	22.25	54	GBIF	GPS
Anguis colchica	Finland	028	60.91	24.68	132	GBIF	GPS
Anguis colchica	Finland	029	61.2	23	96	GBIF	GPS
Anguis colchica	Finland	030	60.27	25.19	36	GBIF	GPS
Anguis colchica	Finland	031	60.59	22.17	50	GBIF	GPS
Anguis colchica	Finland	032	60.41	24.39	48	GBIF	GPS
Anguis colchica	Finland	033	60.99	25.85	119	GBIF	GPS
Anguis colchica	Finland	034	60.77	27.53	66	GBIF	GPS
Anguis colchica	Finland	035	60.52	22.57	46	GBIF	GPS
Anguis colchica	Finland	036	60.92	23.81	140	GBIF	GPS
Anguis colchica	Finland	037	61.48	22.11	52	GBIF	GPS
Anguis colchica	Finland	038	60.2	24.69	36	GBIF	GPS
Anguis colchica	Finland	039	60.13	24.47	35	GBIF	GPS
Anguis colchica	Finland	040	60.22	25.14	21	GBIF	GPS
Anguis colchica	Finland	041	60.6	22.33	50	GBIF	GPS
Anguis colchica	Finland	042	61.86	27.78	124	GBIF	GPS
Anguis colchica	Finland	043	60.51	22.17	43	GBIF	GPS
Anguis colchica	Finland	044	60.18	24.74	22	GBIF	GPS
Anguis colchica	Finland	045	60.52	22.17	60	GBIF	GPS
Anguis colchica	Finland	046	61.19	27.55	100	GBIF	GPS
Anguis colchica	Finland	047	59.91	23.68	1	GBIF	GPS
Anguis colchica	Finland	048	61.43	23.68	149	GBIF	GPS
Anguis colchica	Finland	049	61.69	24.19	164	GBIF	GPS
Anguis colchica	Finland	050	62.4	25.93	110	GBIF	GPS
Anguis colchica	Finland	051	60.29	25.2	49	GBIF	GPS
Anguis colchica	Finland	052	61.85	29.05	83	GBIF	GPS
Anguis colchica	Finland	053	60.35	25.09	51	GBIF	GPS
Anguis colchica	Finland	054	60.84	26.9	59	GBIF	GPS
Anguis colchica	Finland	055	61.5	26.45	109	GBIF	GPS
Anguis colchica	Finland	056	60.67	25.28	108	GBIF	GPS
Anguis colchica	Finland	057	61.09	23.55	127	GBIF	GPS
Anguis colchica	Finland	058	60.53	27.2	2	GBIF	GPS
Anguis colchica	Finland	059	61.14	22.74	69	GBIF	GPS
Anguis colchica	Finland	060	60.25	22.37	6	GBIF	GPS
Anguis colchica	Finland	061	61.04	24.15	86	GBIF	GPS
Anguis colchica	Finland	062	60.9	21.93	55	GBIF	GPS
Anguis colchica	Finland	063	61	25.45	155	GBIF	GPS
Anguis colchica	Finland	064	61.51	24.46	116	GBIF	GPS
Anguis colchica	Finland	065	60.12	23.77	28	GBIF	GPS
Anguis colchica	Finland	066	61.19	25.95	78	GBIF	GPS
Anguis colchica	Finland	067	60.19	24.72	35	GBIF	GPS
Anguis colchica	Finland	068	60.2	24.7	21	GBIF	GPS
Anguis colchica	Finland	069	60.8	23.78	108	GBIF	GPS
Anguis colchica	Finland	071	61.38	28.75	93	GBIF	GPS
Anguis colchica	Finland	072	62.27	27.18	131	GBIF	GPS
Anguis colchica	Finland	073	61.92	25.06	158	GBIF	GPS
Anguis colchica	Finland	074	62.05	26.68	105	GBIF	GPS
Anguis colchica	Finland	075	60.3	23.29	60	GBIF	GPS
Anguis colchica	Finland	076	59.93	23.39	27	GBIF	GPS
Anguis colchica	Finland	077	61.48	24.43	103	GBIF	GPS
Anguis colchica	Finland	078	60.6	24.84	90	GBIF	GPS
Anguis colchica	Finland	079	61.68	26.7	111	GBIF	GPS
Anguis colchica	Finland	080	60.93	26.84	87	GBIF	GPS
Anguis colchica	Finland	081	60.22	25.32	1	GBIF	GPS
Anguis colchica	Finland	082	61	25.42	163	GBIF	GPS
Anguis colchica	Finland	083	62.7	25.85	135	GBIF	GPS
Anguis colchica	Finland	084	62.13	25.66	106	GBIF	GPS
Anguis colchica	Finland	085	60.24	25.79	3	GBIF	GPS
Anguis colchica	Finland	086	61.63	23.83	107	GBIF	GPS
Anguis colchica	Finland	087	61.45	28.87	110	GBIF	GPS
Anguis colchica	Finland	088	61.99	24.07	114	GBIF	GPS
Anguis colchica	Finland	089	61.22	28.08	91	GBIF	GPS
Anguis colchica	Finland	090	61.32	28.57	77	GBIF	GPS
Anguis colchica	Finland	091	62.09	22.17	140	GBIF	GPS
Anguis colchica	Finland	092	60.43	25.08	52	GBIF	GPS
Anguis colchica	Finland	093	60.53	22.26	47	GBIF	GPS
Anguis colchica	Finland	094	61.32	28.56	83	GBIF	GPS
Anguis colchica	Finland	095	59.97	23.68	20	GBIF	GPS
Anguis colchica	Finland	096	60.9	26.54	103	GBIF	GPS
Anguis colchica	Finland	097	60.49	22.16	25	GBIF	GPS
Anguis colchica	Finland	098	59.95	24.04	1	GBIF	GPS
Anguis colchica	Finland	099	60.95	26.27	80	GBIF	GPS
Anguis colchica	Finland	100	60.27	22.98	31	GBIF	GPS
Anguis colchica	Finland	101	61.62	25.17	156	GBIF	GPS
Anguis colchica	Finland	102	62.25	25.82	153	GBIF	GPS
Anguis colchica	Finland	103	61.05	24.31	94	GBIF	GPS
Anguis colchica	Finland	104	60.23	24.8	41	GBIF	GPS
Anguis colchica	Finland	105	62.96	30.89	173	GBIF	GPS
Anguis colchica	Finland	106	61.36	26.96	100	GBIF	GPS
Anguis colchica	Finland	107	60.36	22.28	15	GBIF	GPS
Anguis colchica	Finland	108	60.96	24.34	105	GBIF	GPS
Anguis colchica	Finland	109	60.53	24.94	77	GBIF	GPS
Anguis colchica	Finland	110	61.99	29.94	86	GBIF	GPS
Anguis colchica	Finland	111	61.41	23.9	135	GBIF	GPS
Anguis colchica	Finland	112	61.33	23.76	87	GBIF	GPS
Anguis colchica	Finland	113	61.31	28.56	80	GBIF	GPS
Anguis colchica	Finland	114	60.53	22.16	37	GBIF	GPS
Anguis colchica	Finland	115	61.72	23.26	97	GBIF	GPS
Anguis colchica	Finland	116	60.67	22.36	72	GBIF	GPS
Anguis colchica	Finland	117	61.25	26.16	102	GBIF	GPS
Anguis colchica	Finland	118	62.05	24.74	160	GBIF	GPS
Anguis colchica	Finland	119	60.41	23.98	76	GBIF	GPS
Anguis colchica	Finland	120	60.44	22.38	37	GBIF	GPS
Anguis colchica	Finland	121	62.41	25.6	138	GBIF	GPS
Anguis colchica	Finland	122	60.68	25.07	120	GBIF	GPS
Anguis colchica	Finland	123	60.18	24.65	37	GBIF	GPS
Anguis colchica	Finland	124	60.39	22.76	50	GBIF	GPS
Anguis colchica	Finland	125	60.87	28.33	60	GBIF	GPS
Anguis colchica	Finland	126	62.59	30.23	133	GBIF	GPS
Anguis colchica	Finland	127	61.69	28.06	86	GBIF	GPS
Anguis colchica	Finland	128	61.16	26.37	86	GBIF	GPS
Anguis colchica	Finland	129	61.49	23.97	142	GBIF	GPS
Anguis colchica	Finland	130	62.69	30.67	184	GBIF	GPS
Anguis colchica	Finland	131	61.89	27.79	100	GBIF	GPS
Anguis colchica	Finland	132	62.03	24.82	166	GBIF	GPS
Anguis colchica	Finland	133	60.25	25.14	21	GBIF	GPS
Anguis colchica	Finland	134	61.88	28.74	101	GBIF	GPS
Anguis colchica	Finland	135	61.42	22.7	83	GBIF	GPS
Anguis colchica	Finland	136	60.18	24.64	17	GBIF	GPS
Anguis colchica	Finland	137	60.86	26.26	74	GBIF	GPS
Anguis colchica	Finland	138	60.44	22.37	38	GBIF	GPS
Anguis colchica	Finland	139	61.22	23.42	121	GBIF	GPS
Anguis colchica	Finland	140	62.67	29.62	111	GBIF	GPS
Anguis colchica	Finland	141	60.36	24.66	70	GBIF	GPS
Anguis colchica	Finland	142	62.2	21.96	129	GBIF	GPS
Anguis colchica	Finland	143	60.17	25.02	4	GBIF	GPS
Anguis colchica	Finland	144	62.42	25.6	176	GBIF	GPS
Anguis colchica	Finland	145	60.18	24.7	19	GBIF	GPS
Anguis colchica	Finland	146	62.14	21.9	96	GBIF	GPS
Anguis colchica	Finland	147	60.06	23.78	38	GBIF	GPS
Anguis colchica	Finland	148	60.25	24.85	44	GBIF	GPS
Anguis colchica	Finland	149	62.47	30.27	146	GBIF	GPS
Anguis colchica	Finland	150	60.86	26.75	74	GBIF	GPS
Anguis colchica	Finland	151	60.2	24.62	39	GBIF	GPS
Anguis colchica	Finland	152	60.37	25.13	45	GBIF	GPS
Anguis colchica	Finland	153	60.25	24.8	37	GBIF	GPS
Anguis colchica	Finland	154	61.46	23.82	109	GBIF	GPS
Anguis colchica	Finland	155	60.23	25.16	16	GBIF	GPS
Anguis colchica	Finland	156	61.43	21.7	27	GBIF	GPS
Anguis colchica	Finland	157	60.06	24.27	16	GBIF	GPS
Anguis colchica	Finland	158	61.17	25.87	93	GBIF	GPS
Anguis colchica	Finland	159	61.33	28.48	81	GBIF	GPS
Anguis colchica	Finland	160	62.1	30.34	126	GBIF	GPS
Anguis colchica	Finland	161	62.75	30.9	146	GBIF	GPS
Anguis colchica	Finland	162	60.21	23.64	59	GBIF	GPS
Anguis colchica	Finland	163	62.18	25.7	129	GBIF	GPS
Anguis colchica	Finland	164	61.02	25.7	139	GBIF	GPS
Anguis colchica	Finland	165	60.89	24.82	144	GBIF	GPS
Anguis colchica	Finland	166	62.05	25.44	187	GBIF	GPS
Anguis colchica	Finland	167	60.66	22.13	36	GBIF	GPS
Anguis colchica	Finland	168	61.37	26.84	115	GBIF	GPS
Anguis colchica	Finland	169	60.54	25.14	75	GBIF	GPS
Anguis colchica	Finland	170	60.22	25.04	37	GBIF	GPS
Anguis colchica	Finland	171	60.16	24.74	14	GBIF	GPS
Anguis colchica	Finland	172	60.63	26.96	62	GBIF	GPS
Anguis colchica	Finland	173	60.31	25.2	41	GBIF	GPS
Anguis colchica	Finland	174	60.62	24.6	111	GBIF	GPS
Anguis colchica	Finland	175	61.01	27.41	94	GBIF	GPS
Anguis colchica	Finland	176	60.46	22.58	48	GBIF	GPS
Anguis colchica	Finland	177	61.01	27.52	90	GBIF	GPS
Anguis colchica	Finland	178	60.49	23.57	108	GBIF	GPS
Anguis colchica	Finland	179	61.52	23.51	170	GBIF	GPS
Anguis colchica	Finland	180	61.49	23.45	144	GBIF	GPS
Anguis colchica	Finland	181	60.54	25.61	64	GBIF	GPS
Anguis colchica	Finland	182	61.47	23.96	127	GBIF	GPS
Anguis colchica	Finland	183	62.79	30.18	137	GBIF	GPS
Anguis colchica	Finland	184	60.26	24.94	27	GBIF	GPS
Anguis colchica	Finland	185	60.51	26.99	13	GBIF	GPS
Anguis colchica	Finland	186	60.88	24.93	109	GBIF	GPS
Anguis colchica	Finland	187	61.54	25.17	99	GBIF	GPS
Anguis colchica	Finland	188	60.99	25.57	157	GBIF	GPS
Anguis colchica	Finland	189	60.29	24.51	97	GBIF	GPS
Anguis colchica	Finland	190	60.47	22.46	27	GBIF	GPS
Anguis colchica	Finland	191	60.44	23.05	87	GBIF	GPS
Anguis colchica	Finland	192	60.45	24.95	72	GBIF	GPS
Anguis colchica	Finland	193	60.59	25.36	90	GBIF	GPS
Anguis colchica	Finland	194	61.6	25.32	109	GBIF	GPS
Anguis colchica	Finland	195	62.5	30.1	115	GBIF	GPS
Anguis colchica	Finland	196	60.63	22.28	49	GBIF	GPS
Anguis colchica	Finland	197	60.17	24.71	11	GBIF	GPS
Anguis colchica	Finland	198	60.55	23.94	120	GBIF	GPS
Anguis colchica	Finland	199	61.85	28.76	106	GBIF	GPS
Anguis colchica	Finland	200	60.27	24.11	49	GBIF	GPS
Anguis colchica	Finland	201	60.78	25.03	112	GBIF	GPS
Anguis colchica	Finland	202	60.75	24.23	123	GBIF	GPS
Anguis colchica	Finland	203	60.27	25.22	27	GBIF	GPS
Anguis colchica	Finland	204	60.3	24.81	48	GBIF	GPS
Anguis colchica	Finland	205	60.67	22.33	80	GBIF	GPS
Anguis colchica	Finland	206	61.38	23.7	116	GBIF	GPS
Anguis colchica	Finland	207	62.04	30.3	106	GBIF	GPS
Anguis colchica	Finland	208	60.36	24.34	93	GBIF	GPS
Anguis colchica	Finland	209	60.43	24.34	40	GBIF	GPS
Anguis colchica	Finland	210	61.66	23.2	88	GBIF	GPS
Anguis colchica	Finland	211	60.43	22.77	37	GBIF	GPS
Anguis colchica	Finland	212	62.68	29.71	119	GBIF	GPS
Anguis colchica	Finland	213	60.59	22.28	49	GBIF	GPS
Anguis colchica	Finland	214	62.66	22.31	83	GBIF	GPS
Anguis colchica	Finland	215	61.39	23.92	133	GBIF	GPS
Anguis colchica	Finland	216	60.25	24.65	50	GBIF	GPS
Anguis colchica	Finland	217	61.25	28.12	76	GBIF	GPS
Anguis colchica	Finland	218	60.19	24.68	26	GBIF	GPS
Anguis colchica	Finland	219	60.72	24.8	102	GBIF	GPS
Anguis colchica	Finland	220	60.2	24.61	43	GBIF	GPS
Anguis colchica	Finland	221	62.66	22.32	92	GBIF	GPS
Anguis colchica	Finland	222	60.19	24.69	31	GBIF	GPS
Anguis colchica	Finland	223	61.87	28.75	105	GBIF	GPS
Anguis colchica	Finland	224	60.18	24.71	35	GBIF	GPS
Anguis colchica	Finland	225	62.47	30.21	112	GBIF	GPS
Anguis colchica	Finland	226	60.25	25.08	35	GBIF	GPS
Anguis colchica	Finland	228	60.22	25.16	22	GBIF	GPS
Anguis colchica	Finland	229	60.19	24.73	30	GBIF	GPS
Anguis colchica	Finland	230	61.06	27.73	93	GBIF	GPS
Anguis colchica	Finland	231	61.49	28.83	118	GBIF	GPS
Anguis colchica	Finland	232	61.95	25.2	155	GBIF	GPS
Anguis colchica	Finland	233	61.51	27.91	121	GBIF	GPS
Anguis colchica	Finland	234	60.39	25.74	28	GBIF	GPS
Anguis colchica	Finland	235	61.97	25.11	128	GBIF	GPS
Anguis colchica	Finland	236	60.61	22.1	36	GBIF	GPS
Anguis colchica	Finland	237	60.15	24.36	51	GBIF	GPS
Anguis colchica	Finland	238	60.33	25.03	50	GBIF	GPS
Anguis colchica	Finland	239	60.42	23.38	90	GBIF	GPS
Anguis colchica	Finland	240	60.2	25.13	14	GBIF	GPS
Anguis colchica	Finland	241	62.66	29.65	108	GBIF	GPS
Anguis colchica	Finland	242	61.57	23.95	135	GBIF	GPS
Anguis colchica	Finland	243	60.11	24.44	9	GBIF	GPS
Anguis colchica	Finland	244	60.49	25.05	68	GBIF	GPS
Anguis colchica	Finland	245	60.9	24.88	128	GBIF	GPS
Anguis colchica	Finland	246	60.59	24.05	140	GBIF	GPS
Anguis colchica	Finland	247	61.61	26.16	92	GBIF	GPS
Anguis colchica	Finland	248	60.31	24.59	89	GBIF	GPS
Anguis colchica	Finland	249	61.02	25.69	123	GBIF	GPS
Anguis colchica	Finland	250	61.86	27.92	111	GBIF	GPS
Anguis colchica	Finland	251	60.84	25.99	73	GBIF	GPS
Anguis colchica	Finland	253	60.34	25	53	GBIF	GPS
Anguis colchica	Finland	254	61.7	23.26	100	GBIF	GPS
Anguis colchica	Finland	255	61.25	22	40	GBIF	GPS
Anguis colchica	Finland	256	61.36	27.44	119	GBIF	GPS
Anguis colchica	Finland	257	61.32	22.53	65	GBIF	GPS
Anguis colchica	Finland	258	60.3	24.14	58	GBIF	GPS
Anguis colchica	Finland	259	60.42	24.38	39	GBIF	GPS
Anguis colchica	Finland	260	60.42	23.39	108	GBIF	GPS
Anguis colchica	Finland	261	60.29	24.82	48	GBIF	GPS
Anguis colchica	Finland	262	61.27	27.12	123	GBIF	GPS
Anguis colchica	Finland	263	60.92	25.43	130	GBIF	GPS
Anguis colchica	Finland	264	61.19	28.25	76	GBIF	GPS
Anguis colchica	Finland	265	60.51	22.19	38	GBIF	GPS
Anguis colchica	Finland	266	61.83	29.05	101	GBIF	GPS
Anguis colchica	Finland	267	59.99	23.24	18	GBIF	GPS
Anguis colchica	Finland	268	61.91	25.21	121	GBIF	GPS
Anguis colchica	Finland	269	60.05	24.26	22	GBIF	GPS
Anguis colchica	Finland	270	61.01	25.81	132	GBIF	GPS
Anguis colchica	Finland	271	60.14	24.51	21	GBIF	GPS
Anguis colchica	Finland	272	61.78	29	99	GBIF	GPS
Anguis colchica	Finland	273	61.09	23.14	90	GBIF	GPS
Anguis colchica	Finland	274	60.67	25.91	51	GBIF	GPS
Anguis colchica	Finland	275	60.9	26.58	77	GBIF	GPS
Anguis colchica	Finland	276	60.57	24.94	90	GBIF	GPS
Anguis colchica	Finland	277	61.69	28.27	78	GBIF	GPS
Anguis colchica	Finland	278	62	25.97	139	GBIF	GPS
Anguis colchica	Finland	279	60.29	24.98	25	GBIF	GPS
Anguis colchica	Finland	280	60.42	24.73	59	GBIF	GPS
Anguis colchica	Finland	281	61	25.53	170	GBIF	GPS
Anguis colchica	Finland	282	60.25	23.86	38	GBIF	GPS
Anguis colchica	Finland	283	60.11	25.03	1	GBIF	GPS
Anguis colchica	Finland	284	60.29	24.87	42	GBIF	GPS
Anguis colchica	Finland	286	60.22	24.06	74	GBIF	GPS
Anguis colchica	Finland	287	60.81	26.78	51	GBIF	GPS
Anguis colchica	Finland	288	61.09	22.04	54	GBIF	GPS
Anguis colchica	Finland	289	62.25	25.81	154	GBIF	GPS
Anguis colchica	Finland	290	62.18	25.75	101	GBIF	GPS
Anguis colchica	Finland	291	60.14	24.45	33	GBIF	GPS
Anguis colchica	Finland	292	60.45	24.56	109	GBIF	GPS
Anguis colchica	Finland	293	60.01	22.65	28	GBIF	GPS
Anguis colchica	Finland	294	61.45	27.4	97	GBIF	GPS
Anguis colchica	Finland	295	62.18	25.76	125	GBIF	GPS
Anguis colchica	Finland	296	60.81	26.79	49	GBIF	GPS
Anguis colchica	Finland	297	61.61	27.42	117	GBIF	GPS
Anguis colchica	Finland	298	60.78	22.42	71	GBIF	GPS
Anguis colchica	Finland	299	61.94	25.7	107	GBIF	GPS
Anguis colchica	Finland	300	61.25	28.95	100	GBIF	GPS
Anguis colchica	Finland	301	62.14	25.73	96	GBIF	GPS
Anguis colchica	Finland	302	60.31	24.55	78	GBIF	GPS
Anguis colchica	Finland	303	60.24	25.2	8	GBIF	GPS
Anguis colchica	Finland	304	62.19	27.88	86	GBIF	GPS
Anguis colchica	Finland	305	60.32	23.65	79	GBIF	GPS
Anguis colchica	Finland	306	62.14	25.74	100	GBIF	GPS
Anguis colchica	Finland	307	61.56	28.94	131	GBIF	GPS
Anguis colchica	Finland	308	59.9	23.12	20	GBIF	GPS
Anguis colchica	Finland	309	61.42	23.61	114	GBIF	GPS
Anguis colchica	Finland	310	62.13	28.62	85	GBIF	GPS
Anguis colchica	Finland	311	60.92	24.23	134	GBIF	GPS
Anguis colchica	Finland	313	60.18	24.73	21	GBIF	GPS
Anguis colchica	Finland	314	60.98	26.29	90	GBIF	GPS
Anguis colchica	Finland	315	61.84	23.13	136	GBIF	GPS
Anguis colchica	Finland	316	61.23	25.56	87	GBIF	GPS
Anguis colchica	Finland	317	61.04	24.52	132	GBIF	GPS
Anguis colchica	Finland	318	61.69	24.5	120	GBIF	GPS
Anguis colchica	Finland	319	60.97	28.25	76	GBIF	GPS
Anguis colchica	Finland	320	62.65	30.38	166	GBIF	GPS
Anguis colchica	Finland	321	61.53	28.25	101	GBIF	GPS
Anguis colchica	Finland	322	62.9	29.33	116	GBIF	GPS
Anguis colchica	Finland	323	60.21	24.71	20	GBIF	GPS
Anguis colchica	Finland	324	61.36	25.2	127	GBIF	GPS
Anguis colchica	Finland	325	60.79	24.95	87	GBIF	GPS
Anguis colchica	Finland	326	61.08	27.78	97	GBIF	GPS
Anguis colchica	Finland	327	61.74	28.53	85	GBIF	GPS
Anguis colchica	Finland	328	63.37	30.38	165	GBIF	GPS
Anguis colchica	Finland	329	60.95	27.53	83	GBIF	GPS
Anguis colchica	Finland	330	60.35	26.23	5	GBIF	GPS
Anguis colchica	Finland	331	62.81	29.94	115	GBIF	GPS
Anguis colchica	Finland	332	60.74	22.08	40	GBIF	GPS
Anguis colchica	Finland	333	61.84	23.54	156	GBIF	GPS
Anguis colchica	Finland	334	60.8	25.81	77	GBIF	GPS
Anguis colchica	Finland	335	60.89	21.81	42	GBIF	GPS
Anguis colchica	Finland	337	62.93	23.18	53	GBIF	GPS
Anguis colchica	Finland	339	60.61	22.95	72	GBIF	GPS
Anguis colchica	Finland	340	60.4	25.12	41	GBIF	GPS
Anguis colchica	Finland	341	60.89	24.7	111	GBIF	GPS
Anguis colchica	Finland	342	60.44	27.11	1	GBIF	GPS
Anguis colchica	Finland	343	61.18	28.84	70	GBIF	GPS
Anguis colchica	Finland	344	60.11	25.02	1	GBIF	GPS
Anguis colchica	Finland	345	61.36	24.5	120	GBIF	GPS
Anguis colchica	Finland	346	60.54	25.62	76	GBIF	GPS
Anguis colchica	Finland	347	60.54	27.29	11	GBIF	GPS
Anguis colchica	Finland	348	60.46	25.01	55	GBIF	GPS
Anguis colchica	Finland	349	62.24	30.36	103	GBIF	GPS
Anguis colchica	Finland	34VEM3	60	22.5		Sillero et al., 2014	Centre grid
Anguis colchica	Finland	34VEM3	60.3	22.4		Sillero et al., 2014	Centre grid
Anguis colchica	Finland	34VEM3	60.4	22.8		Sillero et al., 2014	Centre grid
Anguis colchica	Finland	34VEM3	60	22.4		Sillero et al., 2014	Centre grid
Anguis colchica	Finland	34VEM3	60.2	22.5		Sillero et al., 2014	Centre grid
Anguis colchica	Finland	34VEM3	60.3	22.6		Sillero et al., 2014	Centre grid
Anguis colchica	Finland	34VEM3	60.4	22.4		Sillero et al., 2014	Centre grid
Anguis colchica	Finland	34VEM3	60.4	22.3		Sillero et al., 2014	Centre grid
Anguis colchica	Finland	34VEM3	60.2	22.4		Sillero et al., 2014	Centre grid
Anguis colchica	Finland	34VEM3	60.25	22.37		Sillero et al., 2014	Centre grid
Anguis colchica	Finland	34VEM3	60.22	22.48		Sillero et al., 2014	Centre grid
Anguis colchica	Finland	34VEN1	60.9	21.9		Sillero et al., 2014	Centre grid
Anguis colchica	Finland	34VEN1	61.1086	21.4638		Sillero et al., 2014	Centre grid
Anguis colchica	Finland	34VEN2	60.8	21.9		Sillero et al., 2014	Centre grid
Anguis colchica	Finland	34VEN3	60.9	21.93		Sillero et al., 2014	Centre grid
Anguis colchica	Finland	34VEN3	61.2	22.3		Sillero et al., 2014	Centre grid
Anguis colchica	Finland	34VEN3	61.1022	22.3913		Sillero et al., 2014	Centre grid
Anguis colchica	Finland	34VEN4	60.84	21.93		Sillero et al., 2014	Centre grid
Anguis colchica	Finland	34VEN4	60.8	22.2		Sillero et al., 2014	Centre grid
Anguis colchica	Finland	34VEN4	60.7	22.2		Sillero et al., 2014	Centre grid
Anguis colchica	Finland	34VEN4	60.8	22.3		Sillero et al., 2014	Centre grid
Anguis colchica	Finland	34VEN4	60.82	22.31		Sillero et al., 2014	Centre grid
Anguis colchica	Finland	34VEN4	60.71	22.21		Sillero et al., 2014	Centre grid
Anguis colchica	Finland	34VEN4	60.44	22.38		Sillero et al., 2014	Centre grid
Anguis colchica	Finland	34VEN4	60.43	22.35		Sillero et al., 2014	Centre grid
Anguis colchica	Finland	34VEN4	60.6534	22.3719		Sillero et al., 2014	Centre grid
Anguis colchica	Finland	34VEP1	62.0063	21.4774		Sillero et al., 2014	Centre grid
Anguis colchica	Finland	34VEP2	61.5574	21.4705		Sillero et al., 2014	Centre grid
Anguis colchica	Finland	34VEP3	62.2	22		Sillero et al., 2014	Centre grid
Anguis colchica	Finland	34VEP3	62.2	22.1		Sillero et al., 2014	Centre grid
Anguis colchica	Finland	34VEP3	61.9997	22.432		Sillero et al., 2014	Centre grid
Anguis colchica	Finland	34VEP4	61.551	22.4113		Sillero et al., 2014	Centre grid
Anguis colchica	Finland	34VEQ1	62.9038	21.492		Sillero et al., 2014	Centre grid
Anguis colchica	Finland	34VEQ2	62.4	21.9		Sillero et al., 2014	Centre grid
Anguis colchica	Finland	34VEQ2	62.4	21.8		Sillero et al., 2014	Centre grid
Anguis colchica	Finland	34VEQ2	62.43	21.78		Sillero et al., 2014	Centre grid
Anguis colchica	Finland	34VEQ2	62.43	21.86		Sillero et al., 2014	Centre grid
Anguis colchica	Finland	34VEQ2	62.455	21.4846		Sillero et al., 2014	Centre grid
Anguis colchica	Finland	34VEQ3	62.8	22.8		Sillero et al., 2014	Centre grid
Anguis colchica	Finland	34VEQ3	62.7	22.2		Sillero et al., 2014	Centre grid
Anguis colchica	Finland	34VEQ3	62.71	22.21		Sillero et al., 2014	Centre grid
Anguis colchica	Finland	34VEQ3	62.897	22.4756		Sillero et al., 2014	Centre grid
Anguis colchica	Finland	34VEQ4	62.67	22.24		Sillero et al., 2014	Centre grid
Anguis colchica	Finland	34VEQ4	62.4483	22.4534		Sillero et al., 2014	Centre grid
Anguis colchica	Finland	34VER4	63.3456	22.4986		Sillero et al., 2014	Centre grid
Anguis colchica	Finland	34VFM1	60.2	22.9		Sillero et al., 2014	Centre grid
Anguis colchica	Finland	34VFM1	60.3	22.9		Sillero et al., 2014	Centre grid
Anguis colchica	Finland	34VFM1	60.3	22.93		Sillero et al., 2014	Centre grid
Anguis colchica	Finland	34VFM1	60	23.5		Sillero et al., 2014	Centre grid
Anguis colchica	Finland	34VFM1	60.2	23.6		Sillero et al., 2014	Centre grid
Anguis colchica	Finland	34VFM1	60.2	23.4		Sillero et al., 2014	Centre grid
Anguis colchica	Finland	34VFM1	60.3	23		Sillero et al., 2014	Centre grid
Anguis colchica	Finland	34VFM1	60	23.4		Sillero et al., 2014	Centre grid
Anguis colchica	Finland	34VFM1	60.3	23.6		Sillero et al., 2014	Centre grid
Anguis colchica	Finland	34VFM1	60.32	23.65		Sillero et al., 2014	Centre grid
Anguis colchica	Finland	34VFM1	60.1924	23.2545		Sillero et al., 2014	Centre grid
Anguis colchica	Finland	34VFM2	59.9	23.1		Sillero et al., 2014	Centre grid
Anguis colchica	Finland	34VFM2	59.9	23.2		Sillero et al., 2014	Centre grid
Anguis colchica	Finland	34VFM2	59.96	23.36		Sillero et al., 2014	Centre grid
Anguis colchica	Finland	34VFM2	59.91	23.18		Sillero et al., 2014	Centre grid
Anguis colchica	Finland	34VFM3	60	23.7		Sillero et al., 2014	Centre grid
Anguis colchica	Finland	34VFM3	60.1	23.9		Sillero et al., 2014	Centre grid
Anguis colchica	Finland	34VFM3	60.1	23.8		Sillero et al., 2014	Centre grid
Anguis colchica	Finland	34VFM3	60.12	23.77		Sillero et al., 2014	Centre grid
Anguis colchica	Finland	34VFM3	60.2	24.1		Sillero et al., 2014	Centre grid
Anguis colchica	Finland	34VFN1	60.9	23.8		Sillero et al., 2014	Centre grid
Anguis colchica	Finland	34VFN1	61.1	23.8		Sillero et al., 2014	Centre grid
Anguis colchica	Finland	34VFN1	61.1	23.3		Sillero et al., 2014	Centre grid
Anguis colchica	Finland	34VFN1	61.0858	23.4274		Sillero et al., 2014	Centre grid
Anguis colchica	Finland	34VFN2	60.5	22.9		Sillero et al., 2014	Centre grid
Anguis colchica	Finland	34VFN2	60.6369	23.4145		Sillero et al., 2014	Centre grid
Anguis colchica	Finland	34VFP1	61.9835	23.4546		Sillero et al., 2014	Centre grid
Anguis colchica	Finland	34VFP2	61.47	22.97		Sillero et al., 2014	Centre grid
Anguis colchica	Finland	34VFP2	61.5	23.2		Sillero et al., 2014	Centre grid
Anguis colchica	Finland	34VFP2	61.5	23.9		Sillero et al., 2014	Centre grid
Anguis colchica	Finland	34VFP2	61.5	23		Sillero et al., 2014	Centre grid
Anguis colchica	Finland	34VFP2	61.5	23.3		Sillero et al., 2014	Centre grid
Anguis colchica	Finland	34VFP2	61.4	23.7		Sillero et al., 2014	Centre grid
Anguis colchica	Finland	34VFP2	61.6	23.9		Sillero et al., 2014	Centre grid
Anguis colchica	Finland	34VFP2	61.5	23.94		Sillero et al., 2014	Centre grid
Anguis colchica	Finland	34VFP2	61.56	23.87		Sillero et al., 2014	Centre grid
Anguis colchica	Finland	34VFP2	61.45	23.7		Sillero et al., 2014	Centre grid
Anguis colchica	Finland	34VFP2	61.48	23.34		Sillero et al., 2014	Centre grid
Anguis colchica	Finland	34VFP2	61.49	23.94		Sillero et al., 2014	Centre grid
Anguis colchica	Finland	34VFP2	61.51	23.96		Sillero et al., 2014	Centre grid
Anguis colchica	Finland	34VFP2	61.5346	23.4408		Sillero et al., 2014	Centre grid
Anguis colchica	Finland	34VFQ1	62.7	23.2		Sillero et al., 2014	Centre grid
Anguis colchica	Finland	34VFQ1	62.881	23.4836		Sillero et al., 2014	Centre grid
Anguis colchica	Finland	34VFQ2	62.4323	23.4688		Sillero et al., 2014	Centre grid
Anguis colchica	Finland	34VFR1	63.7785	23.5147		Sillero et al., 2014	Centre grid
Anguis colchica	Finland	34VFR2	63.3298	23.4989		Sillero et al., 2014	Centre grid
Anguis colchica	Finland	350	61.45	23.38	119	GBIF	GPS
Anguis colchica	Finland	351	60.41	26.66	3	GBIF	GPS
Anguis colchica	Finland	352	62.27	24.55	157	GBIF	GPS
Anguis colchica	Finland	353	59.88	22.48	20	GBIF	GPS
Anguis colchica	Finland	354	62.9	22.02	26	GBIF	GPS
Anguis colchica	Finland	355	60.3	22.66	14	GBIF	GPS
Anguis colchica	Finland	356	60.62	22.28	43	GBIF	GPS
Anguis colchica	Finland	357	62.08	28.31	99	GBIF	GPS
Anguis colchica	Finland	358	60.56	24.22	108	GBIF	GPS
Anguis colchica	Finland	359	61.8	27.8	118	GBIF	GPS
Anguis colchica	Finland	35VLG3	60.3	24.5		Sillero et al., 2014	Centre grid
Anguis colchica	Finland	35VLG3	60.2	24.6		Sillero et al., 2014	Centre grid
Anguis colchica	Finland	35VLG3	60.2	24.8		Sillero et al., 2014	Centre grid
Anguis colchica	Finland	35VLG3	60.2	24.7		Sillero et al., 2014	Centre grid
Anguis colchica	Finland	35VLG3	60.3	24.8		Sillero et al., 2014	Centre grid
Anguis colchica	Finland	35VLG3	60.2	24.9		Sillero et al., 2014	Centre grid
Anguis colchica	Finland	35VLG3	60.3	24.6		Sillero et al., 2014	Centre grid
Anguis colchica	Finland	35VLG3	60.19	24.72		Sillero et al., 2014	Centre grid
Anguis colchica	Finland	35VLG3	60.2	24.69		Sillero et al., 2014	Centre grid
Anguis colchica	Finland	35VLG3	60.18	24.73		Sillero et al., 2014	Centre grid
Anguis colchica	Finland	35VLG3	60.21	24.59		Sillero et al., 2014	Centre grid
Anguis colchica	Finland	35VLG3	60.24	24.64		Sillero et al., 2014	Centre grid
Anguis colchica	Finland	35VLG3	60.24	24.91		Sillero et al., 2014	Centre grid
Anguis colchica	Finland	35VLG3	60.24	24.77		Sillero et al., 2014	Centre grid
Anguis colchica	Finland	35VLG3	60.2	25.1		Sillero et al., 2014	Centre grid
Anguis colchica	Finland	35VLG3	60.4	25.1		Sillero et al., 2014	Centre grid
Anguis colchica	Finland	35VLG3	60.35	25.09		Sillero et al., 2014	Centre grid
Anguis colchica	Finland	35VLG3	60.22	25.15		Sillero et al., 2014	Centre grid
Anguis colchica	Finland	35VLG3	60.1924	24.7455		Sillero et al., 2014	Centre grid
Anguis colchica	Finland	35VLH3	60.98	24.68		Sillero et al., 2014	Centre grid
Anguis colchica	Finland	35VLH3	61	24.7		Sillero et al., 2014	Centre grid
Anguis colchica	Finland	35VLH3	61.1	24.1		Sillero et al., 2014	Centre grid
Anguis colchica	Finland	35VLH3	61	24.1		Sillero et al., 2014	Centre grid
Anguis colchica	Finland	35VLH3	61.04	24.15		Sillero et al., 2014	Centre grid
Anguis colchica	Finland	35VLH3	61.0858	24.5726		Sillero et al., 2014	Centre grid
Anguis colchica	Finland	35VLH4	60.5	24.5		Sillero et al., 2014	Centre grid
Anguis colchica	Finland	35VLH4	60.5	24.51		Sillero et al., 2014	Centre grid
Anguis colchica	Finland	35VLH4	60.5	25.1		Sillero et al., 2014	Centre grid
Anguis colchica	Finland	35VLH4	60.46	25.14		Sillero et al., 2014	Centre grid
Anguis colchica	Finland	35VLH4	60.6369	24.5855		Sillero et al., 2014	Centre grid
Anguis colchica	Finland	35VLJ3	61.8	24.2		Sillero et al., 2014	Centre grid
Anguis colchica	Finland	35VLJ3	61.82	24.2		Sillero et al., 2014	Centre grid
Anguis colchica	Finland	35VLJ3	62.2	25		Sillero et al., 2014	Centre grid
Anguis colchica	Finland	35VLJ3	61.9835	24.5454		Sillero et al., 2014	Centre grid
Anguis colchica	Finland	35VLJ4	61.4	24.3		Sillero et al., 2014	Centre grid
Anguis colchica	Finland	35VLJ4	61.5	24.5		Sillero et al., 2014	Centre grid
Anguis colchica	Finland	35VLJ4	61.51	24.46		Sillero et al., 2014	Centre grid
Anguis colchica	Finland	35VLJ4	61.42	24.28		Sillero et al., 2014	Centre grid
Anguis colchica	Finland	35VLJ4	61.5346	24.5592		Sillero et al., 2014	Centre grid
Anguis colchica	Finland	35VLK4	62.4323	24.5312		Sillero et al., 2014	Centre grid
Anguis colchica	Finland	35VMG1	60.2	25.2		Sillero et al., 2014	Centre grid
Anguis colchica	Finland	35VMG1	60.4	25.3		Sillero et al., 2014	Centre grid
Anguis colchica	Finland	35VMH1	60.9	26		Sillero et al., 2014	Centre grid
Anguis colchica	Finland	35VMH1	61	25.6		Sillero et al., 2014	Centre grid
Anguis colchica	Finland	35VMH1	61.3	25.7		Sillero et al., 2014	Centre grid
Anguis colchica	Finland	35VMH1	61	25.4		Sillero et al., 2014	Centre grid
Anguis colchica	Finland	35VMH1	61.2	25.9		Sillero et al., 2014	Centre grid
Anguis colchica	Finland	35VMH1	61.19	25.95		Sillero et al., 2014	Centre grid
Anguis colchica	Finland	35VMH1	61	25.45		Sillero et al., 2014	Centre grid
Anguis colchica	Finland	35VMH1	61.01	25.38		Sillero et al., 2014	Centre grid
Anguis colchica	Finland	35VMH1	61.32	25.66		Sillero et al., 2014	Centre grid
Anguis colchica	Finland	35VMH1	61.1022	25.6087		Sillero et al., 2014	Centre grid
Anguis colchica	Finland	35VMH2	60.5	25.4		Sillero et al., 2014	Centre grid
Anguis colchica	Finland	35VMH2	60.5	25.2		Sillero et al., 2014	Centre grid
Anguis colchica	Finland	35VMH2	60.86	26.03		Sillero et al., 2014	Centre grid
Anguis colchica	Finland	35VMH2	60.6534	25.6281		Sillero et al., 2014	Centre grid
Anguis colchica	Finland	35VMH3	60.9	26.5		Sillero et al., 2014	Centre grid
Anguis colchica	Finland	35VMH3	61	26.5		Sillero et al., 2014	Centre grid
Anguis colchica	Finland	35VMH3	61.1	26.2		Sillero et al., 2014	Centre grid
Anguis colchica	Finland	35VMH3	61.1086	26.5362		Sillero et al., 2014	Centre grid
Anguis colchica	Finland	35VMH4	60.8	26.2		Sillero et al., 2014	Centre grid
Anguis colchica	Finland	35VMH4	60.8	26.9		Sillero et al., 2014	Centre grid
Anguis colchica	Finland	35VMH4	60.84	26.9		Sillero et al., 2014	Centre grid
Anguis colchica	Finland	35VMH4	60.6597	26.5426		Sillero et al., 2014	Centre grid
Anguis colchica	Finland	35VMJ1	61.9	25.7		Sillero et al., 2014	Centre grid
Anguis colchica	Finland	35VMJ1	62.2	25.8		Sillero et al., 2014	Centre grid
Anguis colchica	Finland	35VMJ1	62.1	25.7		Sillero et al., 2014	Centre grid
Anguis colchica	Finland	35VMJ1	62.14	25.73		Sillero et al., 2014	Centre grid
Anguis colchica	Finland	35VMJ1	62.14	25.74		Sillero et al., 2014	Centre grid
Anguis colchica	Finland	35VMJ1	61.9997	25.568		Sillero et al., 2014	Centre grid
Anguis colchica	Finland	35VMJ2	61.551	25.5887		Sillero et al., 2014	Centre grid
Anguis colchica	Finland	35VMJ3	61.9	26.2		Sillero et al., 2014	Centre grid
Anguis colchica	Finland	35VMJ3	61.87	26.19		Sillero et al., 2014	Centre grid
Anguis colchica	Finland	35VMJ3	62.0063	26.5226		Sillero et al., 2014	Centre grid
Anguis colchica	Finland	35VMJ4	61.4	26.2		Sillero et al., 2014	Centre grid
Anguis colchica	Finland	35VMJ4	61.4	26.7		Sillero et al., 2014	Centre grid
Anguis colchica	Finland	35VMJ4	61.36	26.74		Sillero et al., 2014	Centre grid
Anguis colchica	Finland	35VMJ4	61.5574	26.5295		Sillero et al., 2014	Centre grid
Anguis colchica	Finland	35VMK1	62.897	25.5244		Sillero et al., 2014	Centre grid
Anguis colchica	Finland	35VMK2	62.3	25.8		Sillero et al., 2014	Centre grid
Anguis colchica	Finland	35VMK2	62.25	25.82		Sillero et al., 2014	Centre grid
Anguis colchica	Finland	35VMK2	62.34	25.81		Sillero et al., 2014	Centre grid
Anguis colchica	Finland	35VMK2	62.4483	25.5466		Sillero et al., 2014	Centre grid
Anguis colchica	Finland	35VMK4	62.66	26.98		Sillero et al., 2014	Centre grid
Anguis colchica	Finland	35VMK4	62.455	26.5154		Sillero et al., 2014	Centre grid
Anguis colchica	Finland	35VML2	63.3456	25.5014		Sillero et al., 2014	Centre grid
Anguis colchica	Finland	35VNH1	60.9	27.1		Sillero et al., 2014	Centre grid
Anguis colchica	Finland	35VNH1	61.3	27.7		Sillero et al., 2014	Centre grid
Anguis colchica	Finland	35VNH1	61.2	27.5		Sillero et al., 2014	Centre grid
Anguis colchica	Finland	35VNH1	61.2	27.4		Sillero et al., 2014	Centre grid
Anguis colchica	Finland	35VNH1	61.17	27.37		Sillero et al., 2014	Centre grid
Anguis colchica	Finland	35VNH1	61.22	27.55		Sillero et al., 2014	Centre grid
Anguis colchica	Finland	35VNH1	61.1086	27.4638		Sillero et al., 2014	Centre grid
Anguis colchica	Finland	35VNH2	60.5	27.6		Sillero et al., 2014	Centre grid
Anguis colchica	Finland	35VNH2	60.5	27.2		Sillero et al., 2014	Centre grid
Anguis colchica	Finland	35VNH2	60.53	27.2		Sillero et al., 2014	Centre grid
Anguis colchica	Finland	35VNH2	60.6597	27.4574		Sillero et al., 2014	Centre grid
Anguis colchica	Finland	35VNH3	60.9	28.3		Sillero et al., 2014	Centre grid
Anguis colchica	Finland	35VNH3	60.9	28.2		Sillero et al., 2014	Centre grid
Anguis colchica	Finland	35VNH3	61.3	28.7		Sillero et al., 2014	Centre grid
Anguis colchica	Finland	35VNH3	61.3	28.6		Sillero et al., 2014	Centre grid
Anguis colchica	Finland	35VNH3	61.1022	28.3913		Sillero et al., 2014	Centre grid
Anguis colchica	Finland	35VNH4	60.85	28.22		Sillero et al., 2014	Centre grid
Anguis colchica	Finland	35VNJ1	62.2	27.9		Sillero et al., 2014	Centre grid
Anguis colchica	Finland	35VNJ1	62.0063	27.4774		Sillero et al., 2014	Centre grid
Anguis colchica	Finland	35VNJ1	62.1	27		Sillero et al., 2014	Centre grid
Anguis colchica	Finland	35VNJ2	61.5	27.6		Sillero et al., 2014	Centre grid
Anguis colchica	Finland	35VNJ2	61.4	27.4		Sillero et al., 2014	Centre grid
Anguis colchica	Finland	35VNJ2	61.5	27.4		Sillero et al., 2014	Centre grid
Anguis colchica	Finland	35VNJ2	61.6	27.4		Sillero et al., 2014	Centre grid
Anguis colchica	Finland	35VNJ2	61.6	27.9		Sillero et al., 2014	Centre grid
Anguis colchica	Finland	35VNJ2	61.6	27.2		Sillero et al., 2014	Centre grid
Anguis colchica	Finland	35VNJ2	61.64	27.22		Sillero et al., 2014	Centre grid
Anguis colchica	Finland	35VNJ2	61.53	27.59		Sillero et al., 2014	Centre grid
Anguis colchica	Finland	35VNJ2	61.5574	27.4705		Sillero et al., 2014	Centre grid
Anguis colchica	Finland	35VNJ3	61.9	28.8		Sillero et al., 2014	Centre grid
Anguis colchica	Finland	35VNJ3	61.9	28.5		Sillero et al., 2014	Centre grid
Anguis colchica	Finland	35VNJ3	61.89	28.52		Sillero et al., 2014	Centre grid
Anguis colchica	Finland	35VNJ3	62	28.9		Sillero et al., 2014	Centre grid
Anguis colchica	Finland	35VNJ3	62.1	28.6		Sillero et al., 2014	Centre grid
Anguis colchica	Finland	35VNJ3	62.1	28.3		Sillero et al., 2014	Centre grid
Anguis colchica	Finland	35VNJ3	62.1	28.9		Sillero et al., 2014	Centre grid
Anguis colchica	Finland	35VNJ3	62.15	28.87		Sillero et al., 2014	Centre grid
Anguis colchica	Finland	35VNJ3	62.12	28.29		Sillero et al., 2014	Centre grid
Anguis colchica	Finland	35VNJ3	61.9997	28.432		Sillero et al., 2014	Centre grid
Anguis colchica	Finland	35VNJ4	61.7	28.1		Sillero et al., 2014	Centre grid
Anguis colchica	Finland	35VNJ4	61.74	28.07		Sillero et al., 2014	Centre grid
Anguis colchica	Finland	35VNJ4	61.551	28.4113		Sillero et al., 2014	Centre grid
Anguis colchica	Finland	35VNK1	62.9038	27.492		Sillero et al., 2014	Centre grid
Anguis colchica	Finland	35VNK1	62.7	27		Sillero et al., 2014	Centre grid
Anguis colchica	Finland	35VNK2	62.6	27.1		Sillero et al., 2014	Centre grid
Anguis colchica	Finland	35VNK2	62.64	27.06		Sillero et al., 2014	Centre grid
Anguis colchica	Finland	35VNK2	62.455	27.4846		Sillero et al., 2014	Centre grid
Anguis colchica	Finland	35VNK3	62.897	28.4756		Sillero et al., 2014	Centre grid
Anguis colchica	Finland	35VNK4	62.4	28.6		Sillero et al., 2014	Centre grid
Anguis colchica	Finland	35VNK4	62.3	28.6		Sillero et al., 2014	Centre grid
Anguis colchica	Finland	35VNK4	62.4	28.4		Sillero et al., 2014	Centre grid
Anguis colchica	Finland	35VNK4	62.3	28.1		Sillero et al., 2014	Centre grid
Anguis colchica	Finland	35VNK4	62.34	28.06		Sillero et al., 2014	Centre grid
Anguis colchica	Finland	35VNK4	62.4483	28.4534		Sillero et al., 2014	Centre grid
Anguis colchica	Finland	35VNL4	63.3456	28.4986		Sillero et al., 2014	Centre grid
Anguis colchica	Finland	35VPH1	61.3	28.9		Sillero et al., 2014	Centre grid
Anguis colchica	Finland	35VPH1	61.25	28.95		Sillero et al., 2014	Centre grid
Anguis colchica	Finland	35VPH1	61.2	29		Sillero et al., 2014	Centre grid
Anguis colchica	Finland	35VPH1	61.3	29		Sillero et al., 2014	Centre grid
Anguis colchica	Finland	35VPJ1	61.8	29.1		Sillero et al., 2014	Centre grid
Anguis colchica	Finland	35VPJ1	61.85	29.05		Sillero et al., 2014	Centre grid
Anguis colchica	Finland	35VPJ1	62.1	29		Sillero et al., 2014	Centre grid
Anguis colchica	Finland	35VPJ1	62.06	29		Sillero et al., 2014	Centre grid
Anguis colchica	Finland	35VPJ1	61.9835	29.4546		Sillero et al., 2014	Centre grid
Anguis colchica	Finland	35VPJ2	61.6	28.9		Sillero et al., 2014	Centre grid
Anguis colchica	Finland	35VPJ2	61.56	28.94		Sillero et al., 2014	Centre grid
Anguis colchica	Finland	35VPJ2	61.4	29		Sillero et al., 2014	Centre grid
Anguis colchica	Finland	35VPJ2	61.32	29.04		Sillero et al., 2014	Centre grid
Anguis colchica	Finland	35VPJ2	61.5346	29.4408		Sillero et al., 2014	Centre grid
Anguis colchica	Finland	35VPK1	62.7	29.6		Sillero et al., 2014	Centre grid
Anguis colchica	Finland	35VPK1	62.66	29.97		Sillero et al., 2014	Centre grid
Anguis colchica	Finland	35VPK1	62.66	29.64		Sillero et al., 2014	Centre grid
Anguis colchica	Finland	35VPK1	62.881	29.4836		Sillero et al., 2014	Centre grid
Anguis colchica	Finland	35VPK2	62.4323	29.4688		Sillero et al., 2014	Centre grid
Anguis colchica	Finland	35VPL2	63.5	29.9		Sillero et al., 2014	Centre grid
Anguis colchica	Finland	35VPL2	63.3298	29.4989		Sillero et al., 2014	Centre grid
Anguis colchica	Finland	360	62.26	28.2	82	GBIF	GPS
Anguis colchica	Finland	361	61.3	23.48	97	GBIF	GPS
Anguis colchica	Finland	362	62.65	30.39	132	GBIF	GPS
Anguis colchica	Finland	363	62.49	27.98	132	GBIF	GPS
Anguis colchica	Finland	364	61.35	21.95	21	GBIF	GPS
Anguis colchica	Finland	365	62.15	25.63	147	GBIF	GPS
Anguis colchica	Finland	366	60.72	24.72	112	GBIF	GPS
Anguis colchica	Finland	367	60.45	25.02	48	GBIF	GPS
Anguis colchica	Finland	368	60.22	25.33	1	GBIF	GPS
Anguis colchica	Finland	36VUQ3	62.9	30.1		Sillero et al., 2014	Centre grid
Anguis colchica	Finland	36VUQ3	62.7	30.2		Sillero et al., 2014	Centre grid
Anguis colchica	Finland	36VUQ3	62.66	30.22		Sillero et al., 2014	Centre grid
Anguis colchica	Finland	36VUQ3	62.7	31		Sillero et al., 2014	Centre grid
Anguis colchica	Finland	36VUQ3	62.881	30.5164		Sillero et al., 2014	Centre grid
Anguis colchica	Finland	36VUQ4	62.6	30.2		Sillero et al., 2014	Centre grid
Anguis colchica	Finland	36VUQ4	62.5	30.2		Sillero et al., 2014	Centre grid
Anguis colchica	Finland	36VUQ4	62.5	30.17		Sillero et al., 2014	Centre grid
Anguis colchica	Finland	36VUQ4	62.4323	30.5312		Sillero et al., 2014	Centre grid
Anguis colchica	Finland	36VUR4	63.3298	30.5011		Sillero et al., 2014	Centre grid
Anguis colchica	Finland	36VVQ1	62.897	31.5244		Sillero et al., 2014	Centre grid
Anguis colchica	Finland	370	62.5	21.83	73	GBIF	GPS
Anguis colchica	Finland	371	60.23	25.35	1	GBIF	GPS
Anguis colchica	Finland	372	60.55	22.61	60	GBIF	GPS
Anguis colchica	Finland	373	60.89	24.69	120	GBIF	GPS
Anguis colchica	Finland	374	60.65	22.17	47	GBIF	GPS
Anguis colchica	Finland	375	60.89	23.66	121	GBIF	GPS
Anguis colchica	Finland	376	62.71	25.86	103	GBIF	GPS
Anguis colchica	Finland	377	60.48	25.36	48	GBIF	GPS
Anguis colchica	Finland	378	60.69	24.37	129	GBIF	GPS
Anguis colchica	Finland	379	61.6	25.15	140	GBIF	GPS
Anguis colchica	Finland	380	62.73	22.51	52	GBIF	GPS
Anguis colchica	Finland	381	61.15	21.42	1	GBIF	GPS
Anguis colchica	Finland	382	61.68	24.47	96	GBIF	GPS
Anguis colchica	Finland	383	62.32	21.73	72	GBIF	GPS
Anguis colchica	Finland	384	60.72	27.71	43	GBIF	GPS
Anguis colchica	Finland	385	61.7	27.38	107	GBIF	GPS
Anguis colchica	Finland	386	61.19	27.57	99	GBIF	GPS
Anguis colchica	Finland	387	61.62	23.17	94	GBIF	GPS
Anguis colchica	Finland	388	61.65	29.69	106	GBIF	GPS
Anguis colchica	Finland	389	59.78	22.97	1	GBIF	GPS
Anguis colchica	Finland	390	62.5	21.82	93	GBIF	GPS
Anguis colchica	Finland	391	60.41	24.4	107	GBIF	GPS
Anguis colchica	Finland	392	60.49	25.11	62	GBIF	GPS
Anguis colchica	Finland	393	60.9	22.92	76	GBIF	GPS
Anguis colchica	Finland	394	61.45	23.39	70	GBIF	GPS
Anguis colchica	Finland	395	61.34	22.14	46	GBIF	GPS
Anguis colchica	Finland	396	62.28	29.65	95	GBIF	GPS
Anguis colchica	Finland	397	62.33	22.27	150	GBIF	GPS
Anguis colchica	Finland	399	61.38	26.86	97	GBIF	GPS
Anguis colchica	Finland	400	62.09	22.94	157	GBIF	GPS
Anguis colchica	Finland	401	61.98	29.95	87	GBIF	GPS
Anguis colchica	Finland	402	60.89	21.82	41	GBIF	GPS
Anguis colchica	Finland	403	61.98	24.05	133	GBIF	GPS
Anguis colchica	Finland	404	62.08	24.38	137	GBIF	GPS
Anguis colchica	Finland	405	61.98	24.06	144	GBIF	GPS
Anguis colchica	Finland	406	60.95	26.29	92	GBIF	GPS
Anguis colchica	Finland	407	61.64	29.69	111	GBIF	GPS
Anguis colchica	Finland	408	60.53	22.25	42	GBIF	GPS
Anguis colchica	Finland	409	61.51	25.81	89	GBIF	GPS
Anguis colchica	Finland	411	61.08	22.04	63	GBIF	GPS
Anguis colchica	Finland	412	60.93	26.85	83	GBIF	GPS
Anguis colchica	Finland	413	62.27	28.2	77	GBIF	GPS
Anguis colchica	Finland	414	60.46	25.48	66	GBIF	GPS
Anguis colchica	Finland	415	62.29	25.22	144	GBIF	GPS
Anguis colchica	Finland	416	59.95	24.05	1	GBIF	GPS
Anguis colchica	Finland	417	61.5	26.46	111	GBIF	GPS
Anguis colchica	Finland	418	61	25.43	160	GBIF	GPS
Anguis colchica	Finland	419	61.67	22.29	71	GBIF	GPS
Anguis colchica	Finland	420	61.77	29.93	86	GBIF	GPS
Anguis colchica	Finland	421	62.43	21.86	113	GBIF	GPS
Anguis colchica	Finland	422	60.4	23.98	61	GBIF	GPS
Anguis colchica	Finland	423	61.75	26.06	112	GBIF	GPS
Anguis colchica	Finland	424	62.93	23.16	56	GBIF	GPS
Anguis colchica	Finland	425	60.3	23.28	48	GBIF	GPS
Anguis colchica	Finland	426	61.75	27.96	105	GBIF	GPS
Anguis colchica	Finland	427	60.73	27.71	47	GBIF	GPS
Anguis colchica	Finland	428	62.05	26.7	123	GBIF	GPS
Anguis colchica	Finland	429	61.1	23.18	114	GBIF	GPS
Anguis colchica	Finland	430	61.35	25.6	104	GBIF	GPS
Anguis colchica	Finland	432	61.39	21.81	27	GBIF	GPS
Anguis colchica	Finland	433	60.24	24.62	64	GBIF	GPS
Anguis colchica	Finland	434	61.26	27.46	89	GBIF	GPS
Anguis colchica	Finland	435	60.13	24.75	7	GBIF	GPS
Anguis colchica	Finland	436	61.72	24.17	174	GBIF	GPS
Anguis colchica	Finland	437	61.42	24.28	122	GBIF	GPS
Anguis colchica	Finland	438	62.71	22.21	143	GBIF	GPS
Anguis colchica	Finland	439	62.24	24.98	167	GBIF	GPS
Anguis colchica	Finland	440	61.11	27.28	104	GBIF	GPS
Anguis colchica	Finland	441	60.7	24.16	128	GBIF	GPS
Anguis colchica	Finland	442	62.07	28.3	93	GBIF	GPS
Anguis colchica	Finland	443	60.86	28.3	45	GBIF	GPS
Anguis colchica	Finland	444	61.24	28.06	77	GBIF	GPS
Anguis colchica	Finland	445	61.75	25.1	127	GBIF	GPS
Anguis colchica	Finland	446	60.85	26.09	86	GBIF	GPS
Anguis colchica	Finland	447	62.68	29.13	87	GBIF	GPS
Anguis colchica	Finland	448	61.36	29.24	105	GBIF	GPS
Anguis colchica	Finland	449	60.25	24.64	60	GBIF	GPS
Anguis colchica	Finland	450	61.82	24.22	181	GBIF	GPS
Anguis colchica	Finland	452	61.48	23.34	77	GBIF	GPS
Anguis colchica	Finland	453	62.65	31	153	GBIF	GPS
Anguis colchica	Finland	454	60.71	22.21	83	GBIF	GPS
Anguis colchica	Finland	455	60.22	24.79	17	GBIF	GPS
Anguis colchica	Finland	456	61.31	25.94	126	GBIF	GPS
Anguis colchica	Finland	457	62.62	29.93	105	GBIF	GPS
Anguis colchica	Finland	458	60.53	24.53	102	GBIF	GPS
Anguis colchica	Finland	459	60.23	24.5	51	GBIF	GPS
Anguis colchica	Finland	460	60.68	24.37	134	GBIF	GPS
Anguis colchica	Finland	461	61.82	25.47	95	GBIF	GPS
Anguis colchica	Finland	462	60.02	22.47	14	GBIF	GPS
Anguis colchica	Finland	463	61.62	25.21	159	GBIF	GPS
Anguis colchica	Finland	464	60.28	25.31	12	GBIF	GPS
Anguis colchica	Finland	465	60.87	23.78	128	GBIF	GPS
Anguis colchica	Finland	466	59.99	22.45	8	GBIF	GPS
Anguis colchica	Finland	467	62.16	22.1	150	GBIF	GPS
Anguis colchica	Finland	468	62.59	25.95	140	GBIF	GPS
Anguis colchica	Finland	469	62.76	22.8	69	GBIF	GPS
Anguis colchica	Finland	470	60.26	25.17	23	GBIF	GPS
Anguis colchica	Finland	471	60.78	24.19	115	GBIF	GPS
Anguis colchica	Finland	472	60.65	24.74	115	GBIF	GPS
Anguis colchica	Finland	473	60.43	22.35	33	GBIF	GPS
Anguis colchica	Finland	474	61.93	25.98	131	GBIF	GPS
Anguis colchica	Finland	475	60.55	27	132	GBIF	GPS
Anguis colchica	Finland	476	62.66	30.22	167	GBIF	GPS
Anguis colchica	Finland	477	61.32	28.48	94	GBIF	GPS
Anguis colchica	Finland	478	62.13	29.97	80	GBIF	GPS
Anguis colchica	Finland	479	61.03	26.54	77	GBIF	GPS
Anguis colchica	Finland	480	62.65	29.83	95	GBIF	GPS
Anguis colchica	Finland	481	62.17	25.73	145	GBIF	GPS
Anguis colchica	Finland	482	60.71	21.97	36	GBIF	GPS
Anguis colchica	Finland	483	61.19	25.47	149	GBIF	GPS
Anguis colchica	Finland	484	60.49	22.17	36	GBIF	GPS
Anguis colchica	Finland	485	62.57	30.19	171	GBIF	GPS
Anguis colchica	Finland	486	62	30.09	108	GBIF	GPS
Anguis colchica	Finland	487	61.44	23.84	137	GBIF	GPS
Anguis colchica	Finland	488	60.36	24.81	51	GBIF	GPS
Anguis colchica	Finland	489	60.74	27.93	44	GBIF	GPS
Anguis colchica	Finland	490	61.41	21.99	38	GBIF	GPS
Anguis colchica	Finland	492	60.28	22.44	14	GBIF	GPS
Anguis colchica	Finland	493	62.12	28.29	89	GBIF	GPS
Anguis colchica	Finland	494	62.65	29.62	113	GBIF	GPS
Anguis colchica	Finland	495	61.27	26.44	94	GBIF	GPS
Anguis colchica	Finland	496	61.4	26.21	122	GBIF	GPS
Anguis colchica	Finland	497	61.4	22.26	59	GBIF	GPS
Anguis colchica	Finland	498	62.9	30.14	108	GBIF	GPS
Anguis colchica	Finland	499	61.32	24.28	120	GBIF	GPS
Anguis colchica	Finland	500	60.04	23.55	19	GBIF	GPS
Anguis colchica	Finland	501	62.71	22.22	135	GBIF	GPS
Anguis colchica	Finland	502	61.37	29.3	88	GBIF	GPS
Anguis colchica	Finland	503	60.06	24.17	25	GBIF	GPS
Anguis colchica	Finland	504	60.46	26.95	1	GBIF	GPS
Anguis colchica	Finland	505	62.2	29.2	82	GBIF	GPS
Anguis colchica	Finland	506	60.73	22.37	72	GBIF	GPS
Anguis colchica	Finland	507	61.71	24.21	171	GBIF	GPS
Anguis colchica	Finland	508	62.33	28.59	102	GBIF	GPS
Anguis colchica	Finland	509	61.25	28.87	101	GBIF	GPS
Anguis colchica	Finland	510	61.36	29.03	117	GBIF	GPS
Anguis colchica	Finland	511	61.32	25.66	127	GBIF	GPS
Anguis colchica	Finland	512	60.49	24.51	90	GBIF	GPS
Anguis colchica	Finland	513	60.31	24.5	76	GBIF	GPS
Anguis colchica	Finland	514	62.63	22.29	112	GBIF	GPS
Anguis colchica	Finland	515	60.34	24.55	96	GBIF	GPS
Anguis colchica	Finland	516	62.67	29.92	96	GBIF	GPS
Anguis colchica	Finland	517	60.31	24.51	71	GBIF	GPS
Anguis colchica	Finland	518	60.51	23.73	122	GBIF	GPS
Anguis colchica	Finland	519	61.5	23.97	141	GBIF	GPS
Anguis colchica	Finland	520	60.87	28.32	58	GBIF	GPS
Anguis colchica	Finland	521	62.06	29	82	GBIF	GPS
Anguis colchica	Finland	522	61.13	24.43	128	GBIF	GPS
Anguis colchica	Finland	523	62.44	28.41	130	GBIF	GPS
Anguis colchica	Finland	524	62	28.93	92	GBIF	GPS
Anguis colchica	Finland	525	60	22.45	1	GBIF	GPS
Anguis colchica	Finland	526	61.21	26.13	88	GBIF	GPS
Anguis colchica	Finland	527	61.4	22	42	GBIF	GPS
Anguis colchica	Finland	528	61.1	26.23	99	GBIF	GPS
Anguis colchica	Finland	529	62.43	28.57	116	GBIF	GPS
Anguis colchica	Finland	530	61.36	28.97	108	GBIF	GPS
Anguis colchica	Finland	531	60.49	27.57	14	GBIF	GPS
Anguis colchica	Finland	532	61.36	26.16	126	GBIF	GPS
Anguis colchica	Finland	533	61.3	25.24	149	GBIF	GPS
Anguis colchica	Finland	534	60.19	24.61	7	GBIF	GPS
Anguis colchica	Finland	535	61.47	22.97	114	GBIF	GPS
Anguis colchica	Finland	536	61.5	23.24	117	GBIF	GPS
Anguis colchica	Finland	537	61.09	23.33	131	GBIF	GPS
Anguis colchica	Finland	538	60.23	24.78	33	GBIF	GPS
Anguis colchica	Finland	539	61.5	23.96	150	GBIF	GPS
Anguis colchica	Finland	540	60.37	25.07	49	GBIF	GPS
Anguis colchica	Finland	541	61.27	25.26	150	GBIF	GPS
Anguis colchica	Finland	542	60.05	23.7	37	GBIF	GPS
Anguis colchica	Finland	543	61.45	27.35	95	GBIF	GPS
Anguis colchica	Finland	544	62.44	28.63	89	GBIF	GPS
Anguis colchica	Finland	545	61.4	21.98	33	GBIF	GPS
Anguis colchica	Finland	546	62.16	21.98	116	GBIF	GPS
Anguis colchica	Finland	547	60.24	24.76	31	GBIF	GPS
Anguis colchica	Finland	548	61.5	23.94	116	GBIF	GPS
Anguis colchica	Finland	549	60.85	28.22	57	GBIF	GPS
Anguis colchica	Finland	550	60.46	25.14	43	GBIF	GPS
Anguis colchica	Finland	551	61.55	27.61	145	GBIF	GPS
Anguis colchica	Finland	552	60.55	25.18	80	GBIF	GPS
Anguis colchica	Finland	553	61.39	21.88	40	GBIF	GPS
Anguis colchica	Finland	554	62.44	28.24	95	GBIF	GPS
Anguis colchica	Finland	555	64.06	23.56	9	GBIF	GPS
Anguis colchica	Finland	556	60.52	25.38	66	GBIF	GPS
Anguis colchica	Finland	557	61.36	22.14	48	GBIF	GPS
Anguis colchica	Finland	558	59.93	22.61	5	GBIF	GPS
Anguis colchica	Finland	559	60.19	24.66	25	GBIF	GPS
Anguis colchica	Finland	560	60.23	24.04	86	GBIF	GPS
Anguis colchica	Finland	561	61.29	27.66	79	GBIF	GPS
Anguis colchica	Finland	562	60.79	26.12	53	GBIF	GPS
Anguis colchica	Finland	563	60.07	23.86	33	GBIF	GPS
Anguis colchica	Finland	564	60.19	23.38	47	GBIF	GPS
Anguis colchica	Finland	565	62.5	30.17	144	GBIF	GPS
Anguis colchica	Finland	566	61.89	28.79	85	GBIF	GPS
Anguis colchica	Finland	567	61.51	23.96	139	GBIF	GPS
Anguis colchica	Finland	568	60.45	22.95	66	GBIF	GPS
Anguis colchica	Finland	569	61.08	23.76	126	GBIF	GPS
Anguis colchica	Finland	570	60.25	24.84	35	GBIF	GPS
Anguis colchica	Finland	571	60.21	23.61	87	GBIF	GPS
Anguis colchica	Finland	572	62.08	27	114	GBIF	GPS
Anguis colchica	Finland	573	60.92	27.1	69	GBIF	GPS
Anguis colchica	Finland	574	60.22	25.15	8	GBIF	GPS
Anguis colchica	Finland	575	61.53	27.61	99	GBIF	GPS
Anguis colchica	Finland	576	61.89	28.52	108	GBIF	GPS
Anguis colchica	Finland	577	61.22	27.55	98	GBIF	GPS
Anguis colchica	Finland	578	63.48	29.91	222	GBIF	GPS
Anguis colchica	Finland	579	62.66	29.64	105	GBIF	GPS
Anguis colchica	Finland	580	61.74	28.07	100	GBIF	GPS
Anguis colchica	Finland	581	61.57	27.91	108	GBIF	GPS
Anguis colchica	Finland	582	62.66	26.98	106	GBIF	GPS
Anguis colchica	Finland	583	60.81	24.01	128	GBIF	GPS
Anguis colchica	Finland	584	60.24	24.64	39	GBIF	GPS
Anguis colchica	Finland	585	60.83	22.17	60	GBIF	GPS
Anguis colchica	Finland	586	60.86	26.03	71	GBIF	GPS
Anguis colchica	Finland	587	61.64	27.22	120	GBIF	GPS
Anguis colchica	Finland	588	62.15	28.87	104	GBIF	GPS
Anguis colchica	Finland	589	60.3	24.52	90	GBIF	GPS
Anguis colchica	Finland	590	62.67	22.24	130	GBIF	GPS
Anguis colchica	Finland	591	62.34	28.06	105	GBIF	GPS
Anguis colchica	Finland	592	62.43	21.78	97	GBIF	GPS
Anguis colchica	Finland	593	61.3	28.95	96	GBIF	GPS
Anguis colchica	Finland	594	61.45	23.7	136	GBIF	GPS
Anguis colchica	Finland	595	61.36	26.74	79	GBIF	GPS
Anguis colchica	Finland	596	62.34	25.81	133	GBIF	GPS
Anguis colchica	Finland	597	61	24.64	140	GBIF	GPS
Anguis colchica	Finland	598	62.64	27.06	126	GBIF	GPS
Anguis colchica	Finland	599	61.17	27.37	109	GBIF	GPS
Anguis colchica	Finland	600	60.97	24.69	116	GBIF	GPS
Anguis colchica	Finland	601	60.24	24.91	29	GBIF	GPS
Anguis colchica	Finland	602	61.96	28.67	76	GBIF	GPS
Anguis colchica	Finland	603	61.82	24.2	177	GBIF	GPS
Anguis colchica	Finland	604	62.75	23.2	106	GBIF	GPS
Anguis colchica	Finland	605	60.28	22.88	1	GBIF	GPS
Anguis colchica	Finland	606	61.34	26.17	107	GBIF	GPS
Anguis colchica	Finland	607	60.01	22.39	17	GBIF	GPS
Anguis colchica	Finland	608	61.56	23.87	129	GBIF	GPS
Anguis colchica	Finland	609	62.7	31.02	149	GBIF	GPS
Anguis colchica	Finland	610	62.66	29.97	95	GBIF	GPS
Anguis colchica	Finland	611	60.21	24.59	46	GBIF	GPS
Anguis colchica	Finland	612	61.49	23.94	129	GBIF	GPS
Anguis colchica	Finland	613	61.01	25.38	150	GBIF	GPS
Anguis colchica	Finland	614	61.18	22.25	71	GBIF	GPS
Anguis colchica	Finland	615	60.22	22.48	31	GBIF	GPS
Anguis colchica	Finland	616	59.97	23.1	1	GBIF	GPS
Anguis colchica	Finland	617	61.39	28.77	105	GBIF	GPS
Anguis colchica	Finland	618	61.32	29.04	107	GBIF	GPS
Anguis colchica	Finland	619	60.3	24.6	84	GBIF	GPS
Anguis colchica	Finland	621	61.34	26.18	107	GBIF	GPS
Anguis colchica	Finland	622	60.43	22.8	62	GBIF	GPS
Anguis colchica	Finland	623	60.23	24.77	44	GBIF	GPS
Anguis colchica	Finland	624	60.31	24.49	96	GBIF	GPS
Anguis colchica	Finland	625	62.73	30.99	150	GBIF	GPS
Anguis colchica	Finland	626	61.87	26.19	118	GBIF	GPS
Anguis colchica	Finland	627	60.94	26.66	77	GBIF	GPS
Anguis colchica	Finland	628	60.82	22.31	66	GBIF	GPS
Anguis colchica	Finland	629	60.21	22.94	42	GBIF	GPS
Anguis colchica	Finland	630	61.33	28.74	83	GBIF	GPS
Anguis colchica	Finland	631	60.99	25.56	151	GBIF	GPS
Anguis colchica	Finland	634	62.24	28.85	107	GBIF	GPS
Anguis colchica	Finland	635	60.24	23.81	57	GBIF	GPS
Anguis colchica	Finland	Kemiönsaari	60.055	22.437		Gvoždík et al., 2021 unpublished	GPS	TP1906
Anguis colchica	Finland	Laukaa. Petaiskorpi	62.4	25.75	135	Bellati et al., unpublished	Literature
Anguis colchica	Finland	Loviisa	60.411	26.396		Gvoždík et al., 2021 unpublished	GPS	TP1901
Anguis colchica	Finland	Meihikkälä, Laisniementie	60.634	27.884		Gvoždík et al., 2021 unpublished	GPS	TP1903
Anguis colchica	Finland	Pernaja	60.5	25.82		Gvoždík et al., 2021 unpublished	GPS	TP1902
Anguis colchica	Finland	Poiksilta	61.789	29.764		Gvoždík et al., 2021 unpublished	GPS	TP1905
Anguis colchica	Finland	Seitseminen	61.931	23.437		Gvoždík et al., 2021 unpublished	GPS	Afi01
Anguis colchica	Finland	Ylojarvi. Seitseminen Kansallispuisto	61.93	23.44	177	Bellati et al., unpublished	Literature
Anguis colchica	Georgia	Abas-Tuman	41.75	42.83	1385	Djanashvili, 1951	GoogleEarth
Anguis colchica	Georgia	Abkhazia	43.17	40.39	65	iNaturalist, GBIF	GPS
Anguis colchica	Georgia	Abrameti	41.6	44.49	1114	iNaturalist, GBIF	GPS
Anguis colchica	Georgia	Adjara	41.68	41.72	75	iNaturalist, GBIF	GPS
Anguis colchica	Georgia	Adjarie	41.54	41.59	15	iNaturalist, GBIF	GPS
Anguis colchica	Georgia	Adżaria	41.66	41.87	408	iNaturalist, GBIF	GPS
Anguis colchica	Georgia	Akhmet Nature Reserve	42.2471	45.1894	1204	Sokolov and Syroechkovsky, 1990	Literature
Anguis colchica	Georgia	Apnia	41.37	43.27	1497	Bellati et al., unpublished	Literature
Anguis colchica	Georgia	Ateni	41.9	44.1	935	Djanashvili, 1951	GoogleEarth
Anguis colchica	Georgia	Avshaly	41.82	44.8	532	Djanashvili, 1951	GoogleEarth
Anguis colchica	Georgia	Babaneuri Strict Nature Reserve	42.0823	45.3874	481	Sokolov and Syroechkovsky, 1990	Literature
Anguis colchica	Georgia	Bakuriani	41.75	43.53	1705	IZANU	GoogleEarth	IZANU 187
Anguis colchica	Georgia	Batumi	41.64	41.64	5	Djanashvili, 1951	GoogleEarth
Anguis colchica	Georgia	Borjomi	41.84	43.38	817	IZANU	GoogleEarth	IZANU 1958
Anguis colchica	Georgia	Borjomi Nature Reserve (= Borjomi-Kharagauli national park)	41.8416	43.2818	1792	Sokolov and Syroechkovsky, 1990	Literature
Anguis colchica	Georgia	Borzhomi	41.51	43.23	1376	GBIF	GPS
Anguis colchica	Georgia	Colchis National Park (= Kolkheti National Park)	42.1705	41.9054	6	Kvavadze et al 2011	Literature
Anguis colchica	Georgia	Daba	41.81	43.45	1019	IZANU	GoogleEarth	IZANU 1128
Anguis colchica	Georgia	Eshera, Abkhazia	43.08	41	188	Bellati et al., unpublished	Literature	MNVNKNU_w/o number
Anguis colchica	Georgia	Goderzi Pass	41.63	42.5	1988	IZANU	GoogleEarth	IZANU 187
Anguis colchica	Georgia	Gombori	41.8588	45.208	1284	Muskhelishvili 1970	Literature
Anguis colchica	Georgia	Gomborskiy Ridge	41.85	45.2	1264	Djanashvili, 1951	GoogleEarth
Anguis colchica	Georgia	Göygöl Nature Reserve (= Göygöl National Park)	40.3998	46.3492	1191	Sokolov and Syroechkovsky, 1990	Literature
Anguis colchica	Georgia	Grigoleti	42.04	41.76	2	GBIF	GPS
Anguis colchica	Georgia	Gudauta	43.08	40.81	32	iNaturalist, GBIF	GPS
Anguis colchica	Georgia	Charnali Canyon	41.6	41.6	4	Bellati et al., unpublished	Literature
Anguis colchica	Georgia	Cheliat gorge (= Cheliat-gom)	42.5611	44.2057	2763	Tuniyev et al., 2017	GPS
Anguis colchica	Georgia	Chocheti	41.9027	44.3317	609	Muskhelishvili 1970	Literature
Anguis colchica	Georgia	Java	42.35	43.9	11	iNaturalist, GBIF	GPS
Anguis colchica	Georgia	Kavtarani	42.37	44.67	1566	iNaturalist, GBIF	GPS
Anguis colchica	Georgia	Kharagouli	42.02	43.19	330	Djanashvili, 1951	GoogleEarth
Anguis colchica	Georgia	Khulo	41.65	42.31	928	Djanashvili, 1951	GoogleEarth
Anguis colchica	Georgia	Kintrish Nature Reserve	41.7599	42.0206	1552	Sokolov and Syroechkovsky, 1990	Literature
Anguis colchica	Georgia	Kobuleti	41.82	41.78	4	Djanashvili, 1951	GoogleEarth
Anguis colchica	Georgia	Kodjori	41.66	44.71	1295	Djanashvili, 1951	GoogleEarth
Anguis colchica	Georgia	Kojori	41.6552	44.7027	1273	Muskhelishvili 1970	Literature
Anguis colchica	Georgia	Kutaisi	42.25	42.7	130	Djanashvili, 1951	GoogleEarth
Anguis colchica	Georgia	Kvabis-Khevi Gorge	41.78	43.25	947	IZANU	GoogleEarth	IZANU 1129
Anguis colchica	Georgia	Kvaliti	42.09	42.99	227	Djanashvili, 1951	GoogleEarth
Anguis colchica	Georgia	Kvemo-Boshuri	41.8612	43.9341	1157	Muskhelishvili 1970	Literature
Anguis colchica	Georgia	Kyor-Ogly Mount	41.64	44.69	1218	Djanashvili, 1951	GoogleEarth
Anguis colchica	Georgia	Lagodekhi	41.8081	46.2782	430	Muskhelishvili 1970	Literature
Anguis colchica	Georgia	Lagodekhi	41.83	46.27	471	Djanashvili, 1951	GoogleEarth
Anguis colchica	Georgia	Lagodekhi Nature Reserve (= Lagodekhi National Park)	41.8794	46.3003	1197	Sokolov and Syroechkovsky, 1990	Literature
Anguis colchica	Georgia	Likani Gorge	41.83	43.35	921	IZANU	GoogleEarth	IZANU 1127
Anguis colchica	Georgia	Lise Lake	41.74	44.74	645	Djanashvili, 1951	GoogleEarth
Anguis colchica	Georgia	Mariamjvar Nature Reserve	41.7642	45.3719	1182	Sokolov and Syroechkovsky, 1990	Literature
Anguis colchica	Georgia	Mleti	42.426	44.4978	1726	Muskhelishvili 1970	Literature
Anguis colchica	Georgia	Mleti	42.43	44.51	1727	Djanashvili, 1951	GoogleEarth
Anguis colchica	Georgia	Mount Rehi and vicinity	42.2718	44.1712	1518	Tuniyev et al., 2017	GPS
Anguis colchica	Georgia	Mount Vartau (= Uar-tau), the vicinity of the villages of Upper Khvtse and Mugut (= Muguti)	42.4233	43.9488	1717	Tuniyev et al., 2017	GPS
Anguis colchica	Georgia	Mtirala Nationalpark	41.68	41.85	567	GBIF	GPS
Anguis colchica	Georgia	Mtskheta	41.8449	44.7153	488	Muskhelishvili 1970	Literature
Anguis colchica	Georgia	Mtskheta-Mtianeti	42.15	44.72	1062	iNaturalist, GBIF	GPS
Anguis colchica	Georgia	Mtskheti	41.84	44.71	528	Djanashvili, 1951	GoogleEarth
Anguis colchica	Georgia	Mukhrovani	41.7803	45.1525	869	Muskhelishvili 1970	Literature
Anguis colchica	Georgia	Mukhrovani	41.78	45.15	874	Djanashvili, 1951	GoogleEarth
Anguis colchica	Georgia	Myusserskiy Reserve	43.19	40.37	83	Litvinchuk, personal database	GoogleEarth
Anguis colchica	Georgia	near Adjaria (Adzharia), Adjar Autonomous Republic	41.66	42.08	1387	GBIF	GPS
Anguis colchica	Georgia	Nizhnie Boshuri, Tona River	41.86	43.95	1158	Djanashvili, 1951	GoogleEarth
Anguis colchica	Georgia	Ortashaly	41.68	44.82	425	Djanashvili, 1951	GoogleEarth
Anguis colchica	Georgia	Pasanauri	42.35	44.69	1118	Djanashvili, 1951	GoogleEarth
Anguis colchica	Georgia	Pitsunda-Musser nature reserve. Ryapsh estuary (Riapshi). Gudauta District, Abkhazia	43.16	40.42	1	Jablonski, personal database	GPS	5306
Anguis colchica	Georgia	Pitsundo-Myussera Nature Reserve	43.1723	40.467	71	Sokolov and Syroechkovsky, 1990	Literature
Anguis colchica	Georgia	Pskhu-Gumista Nature Reserve	43.1777	41.0394	715	Sokolov and Syroechkovsky, 1990	Literature
Anguis colchica	Georgia	Pskhu-Gumista nature reserve, Abkhazia	43.08	41.02	417	Bellati et al., unpublished	Literature
Anguis colchica	Georgia	Pskhu-Gumista nature reserve. river valley Mel'nichnaya. Sukhumi District, Abkhazia	43.18	41.06	867	Jablonski, personal database	GPS	5318
Anguis colchica	Georgia	Pskhu-Gumista nature reserve. the tract of "Pork Beam". Sukhumi District, Abkhazia	43.19	41.06	1037	Jablonski, personal database	GPS	5308
Anguis colchica	Georgia	Psyrtskhy	42.23	42.71	135	Djanashvili, 1951	GoogleEarth
Anguis colchica	Georgia	Rd to Gelati Monastery	42.29	42.77	309	iNaturalist, GBIF	GPS
Anguis colchica	Georgia	Ritsa relict National Park	43.457	40.5336	730	Sokolov and Syroechkovsky, 1990	Literature
Anguis colchica	Georgia	Rokskoe gorge (= Ruk-gom): ruins of a tourist base	42.5921	44.1233	2224	Tuniyev et al., 2017	GPS
Anguis colchica	Georgia	Sagaredjo	41.75	45.34	1013	Djanashvili, 1951	GoogleEarth
Anguis colchica	Georgia	Sagarejo	41.7386	45.3148	874	Muskhelishvili 1970	Literature
Anguis colchica	Georgia	Sataplia Strict Nature Reserve	42.3098	42.6731	230	Sokolov and Syroechkovsky, 1990	Literature
Anguis colchica	Georgia	Satskhenisi	41.8025	45.0652	1095	Muskhelishvili 1970	Literature
Anguis colchica	Georgia	Satskhenisi	41.79	45.06	1009	Djanashvili, 1951	GoogleEarth
Anguis colchica	Georgia	Sbad Gorge (= Sybagom)	42.5901	44.1657	2527	Tuniyev et al., 2017	GPS
Anguis colchica	Georgia	Shakva	41.73	41.73	723	Djanashvili, 1951	GoogleEarth
Anguis colchica	Georgia	Shosheti	41.9	44.34	619	Djanashvili, 1951	GoogleEarth
Anguis colchica	Georgia	Shuamta Raptor Watchpoint	41.68	41.77	431	iNaturalist, GBIF	GPS
Anguis colchica	Georgia	Sighnaghi	41.61	45.92	818	Jablonski, personal database	GPS	1105
Anguis colchica	Georgia	South Ossetian reserve, mountains above the village Tsadykau (= Zonkari)	42.3151	44.1931	1829	Tuniyev et al., 2017	GPS
Anguis colchica	Georgia	South Ossetian reserve, the vicinity of the ruins Acris-Khevi	42.297	44.2238	1463	Tuniyev et al., 2017	GPS
Anguis colchica	Georgia	Southern slope of Mount Lebeurismta (= Labyrdta, Syrkhlabyrdta), Pereviko-khita natural boundary - Nakatodari natural boundary	42.4237	43.6411	1708	Tuniyev et al., 2017	GPS
Anguis colchica	Georgia	Southern slope of Mount Lebeurismta (= Labyrdta, Syrkhlabyrdta), Pereviko-khita natural boundary - Nakatodari natural boundary	42.4359	43.6539	2332	Tuniyev et al., 2017	GPS
Anguis colchica	Georgia	Sukhum-Kali	43	41.01	14	GBIF	GPS
Anguis colchica	Georgia	Sukhumi	43.01	40.99	9	Djanashvili, 1951	GoogleEarth
Anguis colchica	Georgia	Surami	42.02	43.55	831	Djanashvili, 1951	GoogleEarth
Anguis colchica	Georgia	Surroundings of the village Dzau (= Java)	42.3999	43.9255	1335	Tuniyev et al., 2017	GPS
Anguis colchica	Georgia	Surroundings village Edys (= Edisi)	42.5367	44.2165	2293	Tuniyev et al., 2017	GPS
Anguis colchica	Georgia	Surroundings village Kemulta (= Kemulti)	42.4435	43.8397	1800	Tuniyev et al., 2017	GPS
Anguis colchica	Georgia	Surroundings village Wanel (= Vaneli)	42.4653	44.0692	1768	Tuniyev et al., 2017	GPS
Anguis colchica	Georgia	Tana Canion	41.9	44.07	1039	Djanashvili, 1951	GoogleEarth
Anguis colchica	Georgia	Tbilisi	41.742	44.7374	672	Muskhelishvili 1970	Literature
Anguis colchica	Georgia	Tbilisi	41.71	44.76	606	Djanashvili, 1951	GoogleEarth
Anguis colchica	Georgia	Telavi	41.92	45.49	642	Gvoždík et al., 2010	Literature		FJ666584
Anguis colchica	Georgia	Telavi	41.9249	45.5074	576	Muskhelishvili 1970	Literature
Anguis colchica	Georgia	Tcharnali village Tcharnalskoe Gorge. Adjara	41.55	41.61	313	Jablonski, personal database	GPS	5327
Anguis colchica	Georgia	Tkibuli	42.35	43	570	Djanashvili, 1951	GoogleEarth
Anguis colchica	Georgia	Tsebelda	43.02	41.28	429	Djanashvili, 1951	GoogleEarth
Anguis colchica	Georgia	Tsebeldinskoe	43.03	41.27	429	IZANU	GoogleEarth	IZANU 3954
Anguis colchica	Georgia	Tsikhisdziri	41.77	41.77	83	Djanashvili (1951)	GoogleEarth
Anguis colchica	Georgia	Tskhal-Tsitela	42.28	42.76	243	Djanashvili, 1951	GoogleEarth
Anguis colchica	Georgia	Tskhneti	41.69	44.7	1031	Djanashvili, 1951	GoogleEarth
Anguis colchica	Georgia	Tskneti	41.6902	44.6964	938	Muskhelishvili 1970	Literature
Anguis colchica	Georgia	Tsodoreti	41.77	44.63	866	Litvinchuk, personal database	GoogleEarth
Anguis colchica	Georgia	Udzharmy	41.79	45.16	840	Djanashvili, 1951	GoogleEarth
Anguis colchica	Georgia	Ujarma	41.7848	45.1586	812	Muskhelishvili 1970	Literature
Anguis colchica	Georgia	Valley of the Chorokh River	41.5071	41.7154	79	Vedmederya, unpublished	Literature
Anguis colchica	Georgia	Vardzia	41.37	43.27	1497	Gvoždík et al., 2010	Literature		FJ666584
Anguis colchica	Georgia	Verkhnie Laty	43.03	41.49	481	Djanashvili, 1951	GoogleEarth
Anguis colchica	Georgia	Verkhnyaya Gumista River	43.09	41.02	149	Litvinchuk, personal database	GoogleEarth
Anguis colchica	Georgia	vicinity of Pasanauri	42.3463	44.6903	1163	Muskhelishvili 1970	Literature
Anguis colchica	Georgia	vicinity of Surami	42.0253	43.5636	786	Muskhelishvili 1970	Literature
Anguis colchica	Georgia	vicinity of Tskhinval (= Tskhinvali)	42.2225	43.9696	934	Tuniyev et al., 2017	GPS
Anguis colchica	Georgia	Zelyonyi Mys	41.69	41.7	20	Djanashvili, 1951	GoogleEarth
Anguis colchica	Hungary	34TES1	46.6381	21.3221		Sillero et al., 2014	Centre grid
Anguis colchica	Hungary	34TET3	47.8004	22.2686		Sillero et al., 2014	Centre grid
Anguis colchica	Hungary	34TET3	47.8014	22.2641		Sillero et al., 2014	Centre grid
Anguis colchica	Hungary	34TET3	47.5341	21.9919		Sillero et al., 2014	Centre grid
Anguis colchica	Hungary	Abaújszántó	48.29	21.26	223	Vörös, personal database	GPS	71211
Anguis colchica	Hungary	Aggtelek. Jósvafo	48.48	20.58	256	Szabó & Vörös, 2014	Literature		KF736829
Anguis colchica	Hungary	Arka	48.36	21.26	241	Vörös, personal database	GPS	325
Anguis colchica	Hungary	Arka-Mogyoróska patak völgye	48.37	21.28	300	Vörös, personal database	GPS	18073
Anguis colchica	Hungary	Arka-patakvölgy	48.36	21.37	605	Vörös, personal database	GPS	18487
Anguis colchica	Hungary	Bátorliget, Fényi erdő	47.73	22.26	144	Vörös, personal database	GPS	322
Anguis colchica	Hungary	Bátorliget, Júlialiget	47.76	22.22	146	Vörös, personal database	GPS	18701
Anguis colchica	Hungary	Bátorliget, Ősláp	47.77	22.27	138	Vörös, personal database	GPS	321
Anguis colchica	Hungary	Békéscsaba	46.69	21.19	134	Vörös, personal database	GPS	16888
Anguis colchica	Hungary	Békéscsaba	46.68	21.19	83	Vörös, personal database	GPS	40123
Anguis colchica	Hungary	Bélkői Tanösvény, aszfaltút	48.04	20.38	701	Vörös, personal database	GPS	1096
Anguis colchica	Hungary	Bokor	47.91	19.56	267	Vörös, personal database	GPS	54976
Anguis colchica	Hungary	Boldogkőváralja-Várhegy	48.34	21.23	167	Vörös, personal database	GPS	18812
Anguis colchica	Hungary	Börzsöny	47.95	19.01	573	Vörös, personal database	GPS	1386
Anguis colchica	Hungary	Börzsöny Mts. Drégelypalánk	48.05	19.03	168	Szabó & Vörös, 2014	Literature		KF736829
Anguis colchica	Hungary	Buják	47.89	19.52	284	Vörös, personal database	GPS	8867
Anguis colchica	Hungary	Bükk fennsík	48.06	20.42	869	Vörös, personal database	GPS	2063
Anguis colchica	Hungary	Bükk Mts.	48.12	20.65	224	Jablonski, personal database	GPS	3303
Anguis colchica	Hungary	Bükkszentkereszt	48.07	20.63	597	Vörös, personal database	GPS	67374
Anguis colchica	Hungary	Bükkszentkereszt közelében, erdei ösvényen	48.06	20.64	545	Vörös, personal database	GPS	37301
Anguis colchica	Hungary	Bükkzsérc	47.97	20.52	441	Vörös, personal database	GPS	46900
Anguis colchica	Hungary	Cserépváralja: Tardi-patak völgye	47.92	20.58	254	Vörös, personal database	GPS	6735
Anguis colchica	Hungary	Csertölgyes	47.84	19.1	172	Vörös, personal database	GPS	16729
Anguis colchica	Hungary	Diósjenő, vendégház mellett	47.94	19.02	480	Vörös, personal database	GPS	15471
Anguis colchica	Hungary	Domoszló	47.88	20.09	485	Vörös, personal database	GPS	69157
Anguis colchica	Hungary	Dorogháza	47.96	19.88	272	Vörös, personal database	GPS	46139
Anguis colchica	Hungary	Drégelypalánk	48.04	19.04	161	Vörös, personal database	GPS	2365
Anguis colchica	Hungary	Ecseg	47.9	19.58	265	Vörös, personal database	GPS	54859
Anguis colchica	Hungary	Eger	47.91	20.34	250	Vörös, personal database	GPS	70258
Anguis colchica	Hungary	Egerszalók	47.89	20.3	194	Vörös, personal database	GPS	7362
Anguis colchica	Hungary	Erdő mellett a kertben	48.06	20.75	131	Vörös, personal database	GPS	40092
Anguis colchica	Hungary	Erdőben	48.05	20.45	630	Vörös, personal database	GPS	70673
Anguis colchica	Hungary	Erdőben	48	20	238	Vörös, personal database	GPS	70674
Anguis colchica	Hungary	Erdőbénye-Legelő	48.27	21.31	360	Vörös, personal database	GPS	18207
Anguis colchica	Hungary	Erdőhorváti	48.3	21.42	262	Vörös, personal database	GPS	14540
Anguis colchica	Hungary	Erdőszél	48.54	21.46	414	Vörös, personal database	GPS	1655
Anguis colchica	Hungary	Erdőszéli tisztás, dk fekvés	47.84	19.03	182	Vörös, personal database	GPS	3160
Anguis colchica	Hungary	Felsőtárkány	47.99	20.39	443	Vörös, personal database	GPS	5978
Anguis colchica	Hungary	Felsőtárkány	48	20.39	393	GBIF	GPS
Anguis colchica	Hungary	Felsőtárkány	47.99	20.43	704	iNaturalist, GBIF	GPS
Anguis colchica	Hungary	Felsőtárkány	47.97	20.42	252	Vörös, personal database	GPS	67730
Anguis colchica	Hungary	Felsőtárkány	47.97	20.43	332	Vörös, personal database	GPS	7363
Anguis colchica	Hungary	Felsőtold	47.97	19.62	293	Vörös, personal database	GPS	8870
Anguis colchica	Hungary	Fényi-erdő	47.74	22.25	135	Vörös, personal database	GPS	1912
Anguis colchica	Hungary	Füzér: Nyírjes-parlag	48.55	21.44	482	Vörös, personal database	GPS	7127
Anguis colchica	Hungary	Füzérkomlós	48.51	21.45	228	Vörös, personal database	GPS	45864
Anguis colchica	Hungary	Garáb	47.97	19.66	414	Vörös, personal database	GPS	54301
Anguis colchica	Hungary	Gerla	46.68	21.2	81	Vörös, personal database	GPS	46120
Anguis colchica	Hungary	Gyöngyössolymos	47.84	19.95	125	Vörös, personal database	GPS	37587
Anguis colchica	Hungary	Háromhuta-Zsidórét	48.37	21.48	359	Vörös, personal database	GPS	18827
Anguis colchica	Hungary	Harsány	47.98	20.71	181	Vörös, personal database	GPS	54159
Anguis colchica	Hungary	Hejcétől	48.42	21.32	638	Vörös, personal database	GPS	21058
Anguis colchica	Hungary	Hollóháza	48.53	21.41	359	Vörös, personal database	GPS	40796
Anguis colchica	Hungary	Hollókő	47.99	19.55	409	Vörös, personal database	GPS	8869
Anguis colchica	Hungary	Hont	48.03	19.01	218	Vörös, personal database	GPS	60064
Anguis colchica	Hungary	Jászbükki út	47.96	19.01	570	Vörös, personal database	GPS	60059
Anguis colchica	Hungary	Karancsberény	48.17	19.77	440	Vörös, personal database	GPS	70694
Anguis colchica	Hungary	Kastélyhotel	47.91	19.98	346	Vörös, personal database	GPS	20673
Anguis colchica	Hungary	Kelemér	48.34	20.43	333	Vörös, personal database	GPS	7269
Anguis colchica	Hungary	Kemence-völgy	47.96	19	205	Vörös, personal database	GPS	16346
Anguis colchica	Hungary	Kerecsend	47.79	20.32	155	Vörös, personal database	GPS	559
Anguis colchica	Hungary	Kisgyőr	48	20.73	193	Vörös, personal database	GPS	46861
Anguis colchica	Hungary	Kisgyőr	48.01	20.67	240	Vörös, personal database	GPS	38144
Anguis colchica	Hungary	Kishuta	48.42	21.43	336	Vörös, personal database	GPS	46585
Anguis colchica	Hungary	Kishuta-Kőkapu	48.42	21.44	342	Vörös, personal database	GPS	18473
Anguis colchica	Hungary	Kőkapu-lápos	48.43	21.45	130	Vörös, personal database	GPS	18596
Anguis colchica	Hungary	Komlóska, Zsidó-rét	48.35	21.46	397	Vörös, personal database	GPS	327
Anguis colchica	Hungary	Köves	48.08	20.58	722	Vörös, personal database	GPS	69746
Anguis colchica	Hungary	Kozárd	47.93	19.64	305	Vörös, personal database	GPS	8871
Anguis colchica	Hungary	Kutasó	47.96	19.54	342	Vörös, personal database	GPS	8868
Anguis colchica	Hungary	Lázbérci víztároló partján	48.2	20.45	363	Vörös, personal database	GPS	70837
Anguis colchica	Hungary	Les-rétre felvezető úton	47.97	20.35	264	Vörös, personal database	GPS	16610
Anguis colchica	Hungary	Mádi fürdős tó- Nádas	48.19	21.29	203	Vörös, personal database	GPS	44162
Anguis colchica	Hungary	Mátra Mts. Mátrafüred	47.87	19.98	725	Szabó & Vörös, 2014	Literature		KF736829
Anguis colchica	Hungary	Mátra Mts. Mátraháza	47.82	19.97	365	Szabó & Vörös, 2014	Literature		KF736830
Anguis colchica	Hungary	Mátraszentimre	47.89	19.86	703	Vörös, personal database	GPS	47838
Anguis colchica	Hungary	Mátraszentimre	47.92	19.87	785	Vörös, personal database	GPS	37986
Anguis colchica	Hungary	Medve-kút	48.1	19.02	280	Vörös, personal database	GPS	6413
Anguis colchica	Hungary	Miskolc	48.07	20.72	280	Vörös, personal database	GPS	21083
Anguis colchica	Hungary	Miskolc: Létrás	48.1	20.58	585	Vörös, personal database	GPS	7199
Anguis colchica	Hungary	Miskolci	48.06	20.66	640	iNaturalist, GBIF	GPS
Anguis colchica	Hungary	Miskolci Állatkert és Kultúrpark	48.12	20.65	241	Vörös, personal database	GPS	70603
Anguis colchica	Hungary	Miskolctapolcától	48.05	20.73	266	Vörös, personal database	GPS	6330
Anguis colchica	Hungary	Miškovec	48.11	20.64	289	Vörös, personal database	GPS	40432
Anguis colchica	Hungary	Mogyoróska	48.37	21.34	449	Vörös, personal database	GPS	326
Anguis colchica	Hungary	Nagyhuta: Senyő-völgy	48.46	21.42	386	Vörös, personal database	GPS	7131
Anguis colchica	Hungary	Nagymező, Bükk fennsík	48.09	20.5	864	Vörös, personal database	GPS	6014
Anguis colchica	Hungary	Nagyvisnyó	48.09	20.48	914	Vörös, personal database	GPS	39429
Anguis colchica	Hungary	Nagyvisnyó	48.07	20.48	859	Vörös, personal database	GPS	7380
Anguis colchica	Hungary	Nagyvisnyó: Bánkút	48.09	20.47	854	Vörös, personal database	GPS	7190
Anguis colchica	Hungary	Ostoros	47.9	20.43	240	Vörös, personal database	GPS	5263
Anguis colchica	Hungary	Parád, Kékes északi oldal pocsolyái	47.88	20	892	Vörös, personal database	GPS	31353
Anguis colchica	Hungary	Parád, Pál-Bükk - Mar-hát	47.89	20.04	475	Vörös, personal database	GPS	43197
Anguis colchica	Hungary	Parádsasvár	47.9	20.03	392	Vörös, personal database	GPS	47628
Anguis colchica	Hungary	Parasznya	48.12	20.59	429	Vörös, personal database	GPS	15325
Anguis colchica	Hungary	Pásztó	47.9	19.81	458	Vörös, personal database	GPS	6136
Anguis colchica	Hungary	Pénzásás puszta	47.98	19.03	396	Vörös, personal database	GPS	15584
Anguis colchica	Hungary	Pusztafalu	48.54	21.48	125	Vörös, personal database	GPS	40397
Anguis colchica	Hungary	Regéc	48.38	21.36	456	Vörös, personal database	GPS	18092
Anguis colchica	Hungary	Regéc-tisztás	48.4	21.35	465	Vörös, personal database	GPS	18843
Anguis colchica	Hungary	Repashuta	48.07	20.49	827	GBIF	GPS
Anguis colchica	Hungary	Repashuta	48.04	20.52	599	GBIF	GPS
Anguis colchica	Hungary	Rimóc	48	19.56	218	Vörös, personal database	GPS	45816
Anguis colchica	Hungary	Sarkad: Remetei-erdő	46.71	21.3	89	Vörös, personal database	GPS	6730
Anguis colchica	Hungary	Sirok	47.92	20.19	216	Vörös, personal database	GPS	71797
Anguis colchica	Hungary	Szanda	47.91	19.48	343	Vörös, personal database	GPS	8866
Anguis colchica	Hungary	Szendehely	47.86	19.08	223	Vörös, personal database	GPS	8863
Anguis colchica	Hungary	Szilvás-patak, Mád	48.19	21.3	143	Vörös, personal database	GPS	17955
Anguis colchica	Hungary	Szilvásvárad	48.07	20.4	591	Vörös, personal database	GPS	67542
Anguis colchica	Hungary	Szin: Szelcepuszta	48.51	20.6	376	Vörös, personal database	GPS	7165
Anguis colchica	Hungary	Szokolya (Les- völgy)	47.86	19.02	195	Vörös, personal database	GPS	58261
Anguis colchica	Hungary	Szuha, Kossuth út 228. előtt	47.96	19.91	416	Vörös, personal database	GPS	45479
Anguis colchica	Hungary	Tállya Hideg-kút	48.25	21.27	215	Vörös, personal database	GPS	324
Anguis colchica	Hungary	Tard: Bála-rét	47.9	20.58	164	Vörös, personal database	GPS	6734
Anguis colchica	Hungary	Tard: Sugaró, a falu melletti erdő	47.88	20.57	203	Vörös, personal database	GPS	6732
Anguis colchica	Hungary	Tardona	48.18	20.54	244	Vörös, personal database	GPS	71746
Anguis colchica	Hungary	Telkibánya	48.48	21.36	780	Vörös, personal database	GPS	67695
Anguis colchica	Hungary	Terény	47.94	19.45	204	Vörös, personal database	GPS	8865
Anguis colchica	Hungary	Tölgyes erdő.	47.83	19.98	386	Vörös, personal database	GPS	70530
Anguis colchica	Hungary	Túraösvény mellett.	47.9	19.81	487	Vörös, personal database	GPS	1690
Anguis colchica	Hungary	Túraútvonal menti ösvény.	47.83	19.97	348	Vörös, personal database	GPS	70809
Anguis colchica	Hungary	Uppony	48.2144	20.444		Pabijan, personal database	GPS	MPFC 2045, 2056
Anguis colchica	Hungary	Víztározó mellett	48.53	20.64	242	Vörös, personal database	GPS	70959
Anguis colchica	Hungary	Závoz	47.94	19.01	434	Vörös, personal database	GPS	60058
Anguis colchica	Hungary	Zempklén-István-kút	48.41	21.42	473	Vörös, personal database	GPS	18457
Anguis colchica	Hungary	Zemplén-Istvánkút	48.4	21.41	522	Vörös, personal database	GPS	18111
Anguis colchica	Hungary	Zemplén-Nagypéter menykő	48.42	21.39	657	Vörös, personal database	GPS	18737
Anguis colchica	Hungary	Zemplén, Istvánkúti tó	48.4	21.4	562	Vörös, personal database	GPS	17976
Anguis colchica	Iran	10 km by road ENE Chorti	36.77	50.5	2287	Anderson, 1999	Literature
Anguis colchica	Iran	10 km J od Now Kandeh	36.68	53.87	425	Šmíd et al., 2014	Literature	REPT\IRA\246
Anguis colchica	Iran	10km N.Amol	36.56	52.3	2	Šmíd et al., 2014	Literature	34786
Anguis colchica	Iran	15 KM W DASHT	37.28	55.85	1381	Šmíd et al., 2014	Literature	149400
Anguis colchica	Iran	15km SW Dasht	37.22	55.86	1412	Anderson, 1999	Literature
Anguis colchica	Iran	2.2km S seashore, Noor Jangle, Mazandaran Province	36.5683	52.0739	0	B. Safaei-Mahroo, personal database	GPS
Anguis colchica	Iran	24km W Mahmudabad	36.56	51.99	1	Anderson, 1999	Literature
Anguis colchica	Iran	26km by road W Asalem	37.77	48.98	1	Frynta et al., 1997	Literature
Anguis colchica	Iran	26km S Amol	36.28	52.35	1177	Anderson, 1999	Literature
Anguis colchica	Iran	2km S seashore, Noor Jangle, Mazandaran Province	36.5964	52.0583	0	B. Safaei-Mahroo, personal database	GPS
Anguis colchica	Iran	2km S Sehri, Emamzadeh Abdollah, N Amol, Mazandaran Province	36.3972	52.2883	220	B. Safaei-Mahroo, personal database	GPS
Anguis colchica	Iran	3km S Sehri, Emamzadeh Abdollah, N Amol, Mazandaran Province	36.3958	52.2786	237	B. Safaei-Mahroo, personal database	GPS
Anguis colchica	Iran	7.5km NE Gorgan	36.85	54.52	126	Anderson, 1999	Literature
Anguis colchica	Iran	80 km NW Bandar-e Pahlavi	37.83	48.67	1670	Anderson, 1999	Literature
Anguis colchica	Iran	9km N.Amol, Elburs Mts.	36.55	52.31	7	Šmíd et al., 2014	Literature	34784/1-4
Anguis colchica	Iran	Amol	36.46	52.35	82	GBIF	GPS
Anguis colchica	Iran	Amol	36.17	52.21	1207	CAS	GPS	CAS 141160
Anguis colchica	Iran	Asalem, 12 km W by road	37.68	48.83	540	Šmíd et al., 2014	Literature	NMP6V 70057
Anguis colchica	Iran	Assalem, N.Rasht	37.7	48.95	33	Šmíd et al., 2014	Literature	35019/2-3
Anguis colchica	Iran	Astrabad (Gorgan region)	37	54.5	1	Anderson, 1999	Literature
Anguis colchica	Iran	Dasht	37.27	55.84	1458	GBIF	GPS
Anguis colchica	Iran	Elburs,Weyser S.v.Chalus	36.29	51.25	1484	Šmíd et al., 2014	Literature	34115/1-2
Anguis colchica	Iran	Gichob	37.68	48.85	643	Šmíd et al., 2014	Literature	REPT\IRA\284
Anguis colchica	Iran	Gomishan wetland	37.15	53.91	1	Ahmadzadeh et al. 2011 APPENDIX I	Literature
Anguis colchica	Iran	Gorgan	36.83	54.48	121	Šmíd et al., 2014	Literature	34785/1-2
Anguis colchica	Iran	Gorgan, Schaskola-Wald	36.83	54.48	121	Šmíd et al., 2014	Literature	36437/1
Anguis colchica	Iran	Chalus, 25 km from	36.43	51.46	958	ZMMU	GPS	ZMMU 11888; 6647
Anguis colchica	Iran	Chamus	36.37	51.26	907	Bellati et al., unpublished	Literature
Anguis colchica	Iran	Kelerd	36.28	52.37	453	Krása, personal observation	GPS
Anguis colchica	Iran	Kelerd [=Keleri?], 20 km from Amol	36.1	52.1	2046	Šmíd et al., 2014	Literature
Anguis colchica	Iran	Khorramabad	36.77	50.88	9	Anderson, 1999	Literature
Anguis colchica	Iran	Lahijan	37.2	50.02	22	Anderson, 1999	Literature
Anguis colchica	Iran	Mahmud-Abad	36.52	52.02	17	USNM	GPS	USNM 149441
Anguis colchica	Iran	Mazandaran, Paiin deh village, Mr. Moradi	36.13	53.62	1587	Šmíd et al., 2014	Literature	ERP 3715
Anguis colchica	Iran	Mazanderan Prov: 26 km. S. of Amol on rd. to Tehran [ca. 36 17 N, 52 21 E] Elev: 450 M	36.28	52.35	1177	Šmíd et al., 2014	Literature	141160
Anguis colchica	Iran	Motalla Sara-ye Lemir	38.2	48.87	1	Gvoždík et al., 2010	Literature		FJ666582
Anguis colchica	Iran	Motalla Sara, 25 km of Astara	38.2	48.87	1	Šmíd et al., 2014	Literature	NMP6V 72678
Anguis colchica	Iran	No Char	36.65	51.5	1	Šmíd et al., 2014	Literature	MNHN-RA-1948.189
Anguis colchica	Iran	Nord Iran Bandar Pahlavi, 80 km au Nord-Ouest	37.86	48.89	94	Šmíd et al., 2014	Literature	MNHN RA-1966.37
Anguis colchica	Iran	Nowshar	36.65	51.5	1	Gvoždík et al., 2010	Literature		FJ666583
Anguis colchica	Iran	Nowshar	36.65	51.51	1	Šmíd et al., 2014	Literature	NMP6V 72680
Anguis colchica	Iran	Nur	36.56	52.03	7	GBIF	GPS
Anguis colchica	Iran	Nur	36.56	52.03	1	Šmíd et al., 2014	Literature	MVZ 238523
Anguis colchica	Iran	Ramsar	36.9	50.67	2	Anderson, 1999	Literature
Anguis colchica	Iran	Rasht	37.27	49.6	3	Anderson, 1999	Literature
Anguis colchica	Iran	S Royan to 4km to Ab-Pari waterfall, Mazandaran Province	36.4922	51.9328	350	B. Safaei-Mahroo, personal database	GPS
Anguis colchica	Iran	Shahrud	36.42	55.02	1320	Anderson, 1999	Literature
Anguis colchica	Iran	Shirabad Cave	36.79	55.15	1961	GBIF	GPS
Anguis colchica	Iran	Shirabad Cave, 5 km SE (air) of Shirabad, 60 km E (by air) of Gorgan	36.8	55.15	1760	Šmíd et al., 2014	Literature	MVZ 238522
Anguis colchica	Iran	Shirvan	37.4	57.92	1092	Anderson, 1999	Literature	BMNH 1888.5.24.1-2
Anguis colchica	Iran	Siahkal	36.95	49.86	923	iNaturalist, GBIF	GPS
Anguis colchica	Iran	Siahkal	36.95	49.87	1166	iNaturalist, GBIF	GPS
Anguis colchica	Iran	Sisangan,Prov.Mazandaran	36.58	51.8	10	Šmíd et al., 2014	Literature	35019/1
Anguis colchica	Iran	Tamishan	36.51	52.02	23	GBIF	GPS
Anguis colchica	Iran	Tamishan 6 km SW of, 24 km W of Mahmud-Abad	36.52	52.02	17	Šmíd et al., 2014	Literature	149441
Anguis colchica	Iran	Tehran	36.28	52.35	912	GBIF	GPS
Anguis colchica	Latvia	Baltica	55.8582	27.2337	114	Pupins, personal database	GPS
Anguis colchica	Latvia	Bikava	56.7466	27.0526	106	dabasdati.lv	GPS
Anguis colchica	Latvia	Birznieki, Indrāni Parish	56.9856	26.6897	106	Čeirāns, personal database	GPS
Anguis colchica	Latvia	Briči	57.0037	26.8074	102	Čeirāns, personal database	GPS
Anguis colchica	Latvia	Ērgala	56.9343	26.7733	103	Čeirāns, personal database	GPS
Anguis colchica	Latvia	Ilga	55.7026	26.7807	154	Čeirāns, personal database	GPS
Anguis colchica	Latvia	Ilga	55.7009	26.7802	158	Čeirāns, personal database	GPS
Anguis colchica	Latvia	Ilga	55.6944	26.7902	162	Čeirāns, personal database	GPS
Anguis colchica	Latvia	Ilga	55.6912	26.7818	162	Pupins, personal database	GPS
Anguis colchica	Latvia	Ilga	55.69	26.7859	158	Pupins, personal database	GPS
Anguis colchica	Latvia	Ilga	55.6963	26.7775	173	Pupins, personal database	GPS
Anguis colchica	Latvia	Ilga	55.6932	26.7696	165	Pupins, personal database	GPS
Anguis colchica	Latvia	Ilga	55.6871	26.7646	168	Pupins, personal database	GPS
Anguis colchica	Latvia	Ilga	55.6915	26.7807	161	Pupins, personal database	GPS
Anguis colchica	Latvia	Ilga	55.6834	26.7593	157	Pupins, personal database	GPS
Anguis colchica	Latvia	Ilga	55.6857	26.7773	166	Pupins, personal database	GPS
Anguis colchica	Latvia	Ilga	55.6957	26.7923	160	Pupins, personal database	GPS
Anguis colchica	Latvia	Ilza	56.2527	27.2785	164	Čeirāns, personal database	GPS
Anguis colchica	Latvia	Indrāni Parish	56.8741	26.4951	109	Čeirāns, personal database	GPS
Anguis colchica	Latvia	Krāslava	55.8926	27.1972	134	dabasdati.lv	GPS
Anguis colchica	Latvia	Kraukleva	57.007	27.288		Gvoždík et al., 2021 unpublished	GPS	9738
Anguis colchica	Latvia	Kraukļeva	57	27.28	118	Jablonski, personal database	GPS	9738
Anguis colchica	Latvia	Kščeva	55.743	26.3931	136	Pupins, personal database	GPS
Anguis colchica	Latvia	Lejasstradi	57.0942	26.8601	97	Čeirāns, personal database	GPS
Anguis colchica	Latvia	Līkais tilts	55.7614	26.4045	133	Pupins, personal database	GPS
Anguis colchica	Latvia	Līkais tilts	55.7601	26.4057	142	Pupins, personal database	GPS
Anguis colchica	Latvia	Līkais tilts	55.7608	26.4028	137	Pupins, personal database	GPS
Anguis colchica	Latvia	Līkais tilts	55.7612	26.4045	141	Pupins, personal database	GPS
Anguis colchica	Latvia	Līkais tilts	55.761	26.405	145	Pupins, personal database	GPS
Anguis colchica	Latvia	Līkais tilts	55.7598	26.4026	136	Pupins, personal database	GPS
Anguis colchica	Latvia	Līkais tilts	55.7597	26.4033	138	Pupins, personal database	GPS
Anguis colchica	Latvia	Līkais tilts	55.7647	26.4028	125	Pupins, personal database	GPS
Anguis colchica	Latvia	Līkais tilts	55.7551	26.3972	145	Pupins, personal database	GPS
Anguis colchica	Latvia	Līkais tilts	55.7588	26.3957	129	Pupins, personal database	GPS
Anguis colchica	Latvia	Līkais tilts	55.7601	26.4058	142	Pupins, personal database	GPS
Anguis colchica	Latvia	Līkais tilts	55.7606	26.4044	145	Pupins, personal database	GPS
Anguis colchica	Latvia	Līkais tilts	55.7605	26.4035	141	Pupins, personal database	GPS
Anguis colchica	Latvia	Līkais tilts	55.7572	26.4032	139	Pupins, personal database	GPS
Anguis colchica	Latvia	Līkais tilts	55.7592	26.4005	135	Pupins, personal database	GPS
Anguis colchica	Latvia	Ļodāni	56.6706	26.9163	100	Čeirāns, personal database	GPS
Anguis colchica	Latvia	Ļūbaste	55.9586	26.4599	104	Pupins, personal database	GPS
Anguis colchica	Latvia	Mahoņina	56.4328	27.37	176	Čeirāns, personal database	GPS
Anguis colchica	Latvia	Malukšta	56.2742	27.499	185	Pupins, personal database	GPS
Anguis colchica	Latvia	Medumu	55.7715	26.3575	157	Pupins, personal database	GPS
Anguis colchica	Latvia	Meža ciems	55.9364	26.291	109	Pupins, personal database	GPS
Anguis colchica	Latvia	Meža ciems	55.9326	26.2918	110	Pupins, personal database	GPS
Anguis colchica	Latvia	Meža Mackeviči	55.987	26.5127	106	Čeirāns, personal database	GPS
Anguis colchica	Latvia	Misjūni	55.8876	26.935	116	Čeirāns, personal database	GPS
Anguis colchica	Latvia	near Daugavpils	55.9642	26.507	118	Čeirāns, personal database	GPS
Anguis colchica	Latvia	Noviki	55.9009	26.9438	132	Pupins, personal database	GPS
Anguis colchica	Latvia	Ozolaines pagasts	55.7499	26.3331	144	Pupins, personal database	GPS
Anguis colchica	Latvia	Priežu sils	55.9685	26.5073	119	Čeirāns, personal database	GPS
Anguis colchica	Latvia	Rozentova	56.338	27.1955	171	Pupins, personal database	GPS
Anguis colchica	Latvia	Silaktis	57.4114	26.8155	149	dabasdati.lv	GPS
Anguis colchica	Latvia	Skerškāni	55.8837	27.0881	112	Čeirāns, personal database	GPS
Anguis colchica	Latvia	Skudras	56.5436	27.4306	153	Čeirāns, personal database	GPS
Anguis colchica	Latvia	Slutiški	55.914	26.8868	101	Čeirāns, personal database	GPS
Anguis colchica	Latvia	Stikuti	56.2337	27.3274	175	Čeirāns, personal database	GPS
Anguis colchica	Latvia	Stompaki	57.1442	27.5207	139	Čeirāns, personal database	GPS
Anguis colchica	Latvia	Subates pilsēta	56.0035	25.9341	125	Pupins, personal database	GPS
Anguis colchica	Latvia	swamp near the road	57.37	27.04	145	Pupins, personal database	GPS
Anguis colchica	Latvia	Šeškiniški	55.9962	25.9428	126	Pupins, personal database	GPS
Anguis colchica	Latvia	Ūda	56.0659	26.6084	115	Čeirāns, personal database	GPS
Anguis colchica	Latvia	Ustje	56.2287	28.0428	172	dabasdati.lv	GPS
Anguis colchica	Latvia	Vasargeliški	55.9144	26.8135	112	dabasdati.lv	GPS
Anguis colchica	Latvia	Vecpoļi	56.8397	26.3291	133	dabasdati.lv	GPS
Anguis colchica	Latvia	Vecsikeli	55.892	26.846		Gvoždík et al., 2021 unpublished	GPS	9737
Anguis colchica	Latvia	Vecsiķeļi	55.8924	26.8458	123	Pupins, personal database	GPS
Anguis colchica	Latvia	Vecsiķeļi	55.89	26.84	125	Jablonski, personal database	GPS	9737
Anguis colchica	Latvia	Vejini	57.374	27.05		Gvoždík et al., 2021 unpublished	GPS	9739
Anguis colchica	Latvia	Vējiņi	57.3735	27.0496	183	Pupins, personal database	GPS
Anguis colchica	Latvia	Vējiņi	57.37	27.04	185	Jablonski, personal database	GPS	9739
Anguis colchica	Latvia	Viktorija	55.7114	26.7967	163	Čeirāns, personal database	GPS
Anguis colchica	Latvia	Viktorija	55.7296	26.8034	152	Pupins, personal database	GPS
Anguis colchica	Latvia	Viktorija	55.7202	26.8254	149	Pupins, personal database	GPS
Anguis colchica	Latvia	Viktorija	55.7073	26.7903	154	Pupins, personal database	GPS
Anguis colchica	Latvia	Voskāni	56.5445	27.4592	156	Čeirāns, personal database	GPS
Anguis colchica	Latvia	Zapoļniki	55.905	26.9373	113	Čeirāns, personal database	GPS
Anguis colchica	Lithuania	001	54.76	24.94	124	GBIF	GPS
Anguis colchica	Lithuania	002	54.8	24.78	121	GBIF	GPS
Anguis colchica	Lithuania	Marcinkonys	54.04	24.44	135	Gvoždík et al., 2010	GPS		FJ666581
Anguis colchica	Lithuania	Paluše	55.33	26.1	137	Gvoždík et al., 2010	GPS		FJ666581
Anguis colchica	Lithuania	Pašekščiai Ortslage	55.3	25.69	165	GBIF	GPS
Anguis colchica	Lithuania	Šalčininkų	54.43	25.08	139	GBIF	GPS
Anguis colchica	Lithuania	Švenčionių	54.93	25.68	133	GBIF	GPS
Anguis colchica	Lithuania	Trakų	54.8	24.77	127	GBIF	GPS
Anguis colchica	Lithuania	Unnamed Road	54.76	24.93	109	GBIF	GPS
Anguis colchica	Lithuania	Vilniaus	54.82	25.44	67	iNaturalist, GBIF	GPS
Anguis colchica	Lithuania	Vilniaus	54.8	24.89	75	GBIF	GPS
Anguis colchica	Moldova	35TNN3	47.6239	27.9982		Sillero et al., 2014	Centre grid
Anguis colchica	Moldova	35TNN4	47.1741	27.9897		Sillero et al., 2014	Centre grid
Anguis colchica	Moldova	35TPM1	46.7167	28.6356		Sillero et al., 2014	Centre grid
Anguis colchica	Moldova	35TPM2	46.2669	28.6221		Sillero et al., 2014	Centre grid
Anguis colchica	Moldova	35TPM3	46.7055	29.2894		Sillero et al., 2014	Centre grid
Anguis colchica	Moldova	35TPN1	47.6162	28.6634		Sillero et al., 2014	Centre grid
Anguis colchica	Moldova	35TPN2	47.1665	28.6493		Sillero et al., 2014	Centre grid
Anguis colchica	Moldova	35TPN4	47.1551	29.3086		Sillero et al., 2014	Centre grid
Anguis colchica	Moldova	35UNP2	48.0776	27.3356		Sillero et al., 2014	Centre grid
Anguis colchica	Moldova	Bravicheny	47.43	28.66	33	Tofan, 1966	GoogleEarth
Anguis colchica	Moldova	Bylyavintsy	48.3	26.95	198	Tofan, 1966	GoogleEarth
Anguis colchica	Moldova	Gamsheshty	46.82	28.58	218	IZANU	GoogleEarth	IZANU 3957
Anguis colchica	Moldova	Chuteshty	47.18	28.15	353	Tofan, 1966	GoogleEarth
Anguis colchica	Moldova	Ivansha	47.28	28.85	152	Tofan, 1966	GoogleEarth
Anguis colchica	Moldova	Karbuna	46.69	28.95	204	Tofan, 1966	GoogleEarth
Anguis colchica	Moldova	Kodry	46.98	28.82	119	Tofan, 1966	GoogleEarth
Anguis colchica	Moldova	Korneshty	47.36	28	223	Tofan, 1966	GoogleEarth
Anguis colchica	Moldova	Oloneshty	46.5	29.92	45	Tofan, 1966	GoogleEarth
Anguis colchica	Moldova	Parkany	46.84	29.51	10	Tofan, 1966	GoogleEarth
Anguis colchica	Moldova	Rashkovo	47.95	28.87	137	Bezman, personal data (Litvinchuk, personal database)	GoogleEarth
Anguis colchica	Moldova	Reshule	47.3	28.36	143	Tofan, 1966	GoogleEarth
Anguis colchica	Moldova	Rublenitsa	48.17	28.21	225	Tofan, 1966	GoogleEarth
Anguis colchica	Moldova	Susleny	47.41	28.99	167	Tofan, 1966	GoogleEarth
Anguis colchica	Moldova	Vasieny	46.97	28.56	203	Tofan, 1966	GoogleEarth
Anguis colchica	Moldova	Vodul-Luy-Vody	47.09	29.08	50	Tofan, 1966	GoogleEarth
Anguis colchica	Moldova	Volontirovka	46.42	29.62	102	Tofan, 1966	GoogleEarth
Anguis colchica	Moldova	Vornicheny	47.14	28.42	138	Tofan, 1966	GoogleEarth
Anguis colchica	Moldova	Dniester region	48.01	28.47	187	Bezman-Moseyko, 2008	GoogleEarth
Anguis colchica	Poland	34UEV3	49.375	22.0833		Sillero et al., 2014	Centre grid
Anguis colchica	Poland	34UEV3	49.5417	22.0833		Sillero et al., 2014	Centre grid
Anguis colchica	Poland	34UEV3	49.625	22.25		Sillero et al., 2014	Centre grid
Anguis colchica	Poland	34UEV3	49.5417	22.25		Sillero et al., 2014	Centre grid
Anguis colchica	Poland	34UEV3	49.4583	22.25		Sillero et al., 2014	Centre grid
Anguis colchica	Poland	34UEV3	49.375	22.25		Sillero et al., 2014	Centre grid
Anguis colchica	Poland	34UEV3	49.2917	22.25		Sillero et al., 2014	Centre grid
Anguis colchica	Poland	34UEV3	49.2083	22.0833		Sillero et al., 2014	Centre grid
Anguis colchica	Poland	34UEV3	49.2083	22.25		Sillero et al., 2014	Centre grid
Anguis colchica	Poland	34UFA2	49.7083	22.5833		Sillero et al., 2014	Centre grid
Anguis colchica	Poland	34UFB3	51.375	23.25		Sillero et al., 2014	Centre grid
Anguis colchica	Poland	34UFB3	51.375	23.5833		Sillero et al., 2014	Centre grid
Anguis colchica	Poland	34UFB3	51.125	23.4167		Sillero et al., 2014	Centre grid
Anguis colchica	Poland	34UFB3	51.2917	23.4167		Sillero et al., 2014	Centre grid
Anguis colchica	Poland	34UFB3	51.2917	23.5833		Sillero et al., 2014	Centre grid
Anguis colchica	Poland	34UFB3	51.2083	23.5833		Sillero et al., 2014	Centre grid
Anguis colchica	Poland	34UFB3	51.0417	23.75		Sillero et al., 2014	Centre grid
Anguis colchica	Poland	34UFB4	50.7917	23.9167		Sillero et al., 2014	Centre grid
Anguis colchica	Poland	34UFB4	50.9583	23.75		Sillero et al., 2014	Centre grid
Anguis colchica	Poland	34UFB4	50.625	23.9167		Sillero et al., 2014	Centre grid
Anguis colchica	Poland	34UFC2	51.4583	23.0833		Sillero et al., 2014	Centre grid
Anguis colchica	Poland	34UFC4	51.4583	23.25		Sillero et al., 2014	Centre grid
Anguis colchica	Poland	34UFC4	51.4583	23.5833		Sillero et al., 2014	Centre grid
Anguis colchica	Poland	34UFD4	52.7083	23.75		Sillero et al., 2014	Centre grid
Anguis colchica	Poland	34UFD4	52.7083	23.9167		Sillero et al., 2014	Centre grid
Anguis colchica	Poland	34UFD4	52.625	23.75		Sillero et al., 2014	Centre grid
Anguis colchica	Poland	34UFV1	49.4583	22.4167		Sillero et al., 2014	Centre grid
Anguis colchica	Poland	34UFV1	49.5417	22.4167		Sillero et al., 2014	Centre grid
Anguis colchica	Poland	34UFV1	49.625	22.5833		Sillero et al., 2014	Centre grid
Anguis colchica	Poland	34UFV1	49.5417	22.5833		Sillero et al., 2014	Centre grid
Anguis colchica	Poland	34UFV1	49.4583	22.5833		Sillero et al., 2014	Centre grid
Anguis colchica	Poland	34UFV1	49.2083	22.4167		Sillero et al., 2014	Centre grid
Anguis colchica	Poland	34UFV1	49.2917	22.4167		Sillero et al., 2014	Centre grid
Anguis colchica	Poland	34UFV1	49.2083	22.5833		Sillero et al., 2014	Centre grid
Anguis colchica	Poland	34UFV2	49.125	22.5833		Sillero et al., 2014	Centre grid
Anguis colchica	Poland	Antolka	50.399	20.0592		Pabijan, personal database	GPS	MPFC 1938
Anguis colchica	Poland	Będkowice	50.16	19.75	412	GBIF	GPS
Anguis colchica	Poland	Beskid Sądecki, Przehyba	49.4918	20.5585		Pabijan, personal database	GPS	MPFC 1332
Anguis colchica	Poland	Białawoda	49.69	20.63	590	GBIF	GPS
Anguis colchica	Poland	Biłgoraj	50.53	22.75	204	Jablonski, personal database	GPS	3689
Anguis colchica	Poland	Błudek, nadl. Józefów	50.4096	23.1194		Pabijan, personal database	GPS	MPFC 4054
Anguis colchica	Poland	Bocki	52.65	23.05	143	Gvoždík et al., 2010	Literature		FJ666579
Anguis colchica	Poland	Borowe Młyny, nadl. Józefów	50.373	23.081		Pabijan, personal database	GPS	MPFC 4048
Anguis colchica	Poland	Borowe Młyny, nadl. Józefów	50.3717	23.0808		Pabijan, personal database	GPS	MPFC 4059
Anguis colchica	Poland	Brodziaki	50.51	22.79	201	Jablonski et al., 2017	Literature	3691	MF817483
Anguis colchica	Poland	Brzanka	49.8347	21.3236		Pabijan, personal database	GPS	MPFC 2061
Anguis colchica	Poland	Brzanka	49.8377	21.3423		Pabijan, personal database	GPS	MPFC 2063
Anguis colchica	Poland	Brzanka, Liwocz	49.8332	21.3451		Pabijan, personal database	GPS	MPFC 2070
Anguis colchica	Poland	Bukownica, nadl. Zwierzyniec	50.5392	22.8542		Pabijan, personal database	GPS	MPFC 4052
Anguis colchica	Poland	Bukowno	50.22	19.39	318	GBIF	GPS
Anguis colchica	Poland	Busko-Zdroj	50.5	20.75	224	GBIF	GPS
Anguis colchica	Poland	Carska Tropina, Białowieża	52.7808	23.7963		Pabijan, personal database	GPS	MPFC 1932
Anguis colchica	Poland	Cygany	50.5	21.75	163	GBIF	GPS
Anguis colchica	Poland	Czekanka	50.5	19.25	318	GBIF	GPS
Anguis colchica	Poland	Czerna	50.17	19.63	436	GBIF	GPS
Anguis colchica	Poland	Czudec	49.945	21.8339		Pabijan, personal database	GPS	MPFC 1072, 1073
Anguis colchica	Poland	Czudec	49.9591	21.8367		Pabijan, personal database	GPS	MPFC 1650
Anguis colchica	Poland	Czułów	50.06	19.71	271	GBIF	GPS
Anguis colchica	Poland	Dereźnia Solska	50.5	22.75	204	GBIF	GPS
Anguis colchica	Poland	droga do Kosego Mostu, Białowieża	52.799	23.8257		Pabijan, personal database	GPS	MPFC 1930
Anguis colchica	Poland	Chobot	50.08	20.37	196	GBIF	GPS
Anguis colchica	Poland	Chrząstowice	50.34	19.69	369	GBIF	GPS
Anguis colchica	Poland	Ispina	50.1	20.36	194	GBIF	GPS
Anguis colchica	Poland	Jadowniki Mokre	50.16	20.75	179	GBIF	GPS
Anguis colchica	Poland	Jasienica	49.81	18.8974		Pabijan, personal database	GPS	MPFC 1742
Anguis colchica	Poland	Jaszcze Duźe	49.52	20.22	764	Bellati et al., unpublished	Literature
Anguis colchica	Poland	Jaszcze Duźe. between Jaszcze Duźe and Jaszcze	49.52	20.23	790	Bellati et al., unpublished	Literature
Anguis colchica	Poland	Jerzmanowice	50.19	19.72	381	GBIF	GPS
Anguis colchica	Poland	Kamieniec	50.45	21.25	171	Bellati et al., unpublished	Literature
Anguis colchica	Poland	Karniowice	50.15	19.78	311	GBIF	GPS
Anguis colchica	Poland	Kazimierz Dolny	51.32	21.95	129	Jablonski et al., 2017	Literature	3717	MF817492
Anguis colchica	Poland	Kepanow	49.83	20.25	337	GBIF	GPS
Anguis colchica	Poland	Kielce	50.83	20.75	271	GBIF	GPS
Anguis colchica	Poland	Kłaj, Puszcza Niepołomicka	50.0073	20.2861		Pabijan, personal database	GPS	MPFC 1119
Anguis colchica	Poland	Kłaj, Puszcza Niepołomicka	50.0059	20.3003		Pabijan, personal database	GPS	MPFC 3117
Anguis colchica	Poland	Kłaj, Puszcza Niepołomicka	50.0076	20.3		Pabijan, personal database	GPS	MPFC 3105
Anguis colchica	Poland	Kłoda	50.5	21.25	175	GBIF	GPS
Anguis colchica	Poland	Kłudzie	51.16	21.75	164	GBIF	GPS
Anguis colchica	Poland	Komańcza	49.3811	21.881		iNaturalist, GBIF	GPS
Anguis colchica	Poland	Krakow	50.06	19.85	341	GBIF	GPS
Anguis colchica	Poland	Krężnica Okrągła	51.16	22.25	225	GBIF	GPS
Anguis colchica	Poland	Krosno	49.69	21.77	278	Jablonski et al., 2017	Literature	3697	MF817487
Anguis colchica	Poland	Krywe	49.26	22.5	551	GBIF	GPS
Anguis colchica	Poland	Kukiełki, nadl. Zwierzyniec	50.521	22.9034		Pabijan, personal database	GPS	MPFC 4058
Anguis colchica	Poland	Laski Bruskie	51.5	23.25	193	GBIF	GPS
Anguis colchica	Poland	Lechówka	51.16	23.25	281	GBIF	GPS
Anguis colchica	Poland	Leszczawa Dolna	49.6691	22.4366		Pabijan, personal database	GPS	MPFC 1031, 1032
Anguis colchica	Poland	Lipiny	52.75	23.64	196	GBIF	GPS
Anguis colchica	Poland	Lipówka, Puszcza Niepołomicka	50.0858	20.3737		Pabijan, personal database	GPS	MPFC 3396
Anguis colchica	Poland	Myczkowce, Bieszczady	49.4428	22.4071		Pabijan, personal database	GPS	MPFC 1702
Anguis colchica	Poland	Nowy Sacz	49.5	20.75	641	GBIF	GPS
Anguis colchica	Poland	NP Pieniny. chta Orlica	49.42	20.46	500	Jablonski et al., 2017	Literature	443	MF817478
Anguis colchica	Poland	NP Pieniny. sedlo Szopka	49.42	20.41	776	Jablonski et al., 2017	Literature	446	MF817479
Anguis colchica	Poland	Odwiśle	50.08	20.3	210	GBIF	GPS
Anguis colchica	Poland	Ochaby Male	49.83	18.75	296	GBIF	GPS
Anguis colchica	Poland	Ochotnica Gorna	49.5	20.25	858	GBIF	GPS
Anguis colchica	Poland	Ochotnica Górna	49.5	20.25	863	Bellati et al., unpublished	Literature
Anguis colchica	Poland	Olchowiec, Beskid Niski	49.4719	21.6088		Pabijan, personal database	GPS	MPFC 1698
Anguis colchica	Poland	Olszowa	49.81	20.82	434	GBIF	GPS
Anguis colchica	Poland	Ostrów	50.16	21.75	238	GBIF	GPS
Anguis colchica	Poland	Podlesie	50.16	23.25	244	GBIF	GPS
Anguis colchica	Poland	Podlesie	50.5	20.25	276	GBIF	GPS
Anguis colchica	Poland	Połonina Caryńska,	49.1389	22.6018		iNaturalist, GBIF	GPS
Anguis colchica	Poland	Porabka	49.83	19.25	417	GBIF	GPS
Anguis colchica	Poland	Posadza	50.16	20.25	241	GBIF	GPS
Anguis colchica	Poland	Proszówki	50	20.42	198	GBIF	GPS
Anguis colchica	Poland	Przemyśl	49.83	22.75	282	GBIF	GPS
Anguis colchica	Poland	Przychody	50.5	19.75	328	GBIF	GPS
Anguis colchica	Poland	Puszcza Niepołomicka	50.0327	20.3181		Pabijan, personal database	GPS	MPFC 1524
Anguis colchica	Poland	Puszcza Niepołomicka	50.0321	20.3162		Pabijan, personal database	GPS	MPFC 1967
Anguis colchica	Poland	Puszcza Niepołomicka	50.0501	20.3521		Pabijan, personal database	GPS	MPFC 2071
Anguis colchica	Poland	Puszcza Niepołomicka	50.0045	20.3613		Pabijan, personal database	GPS	MPFC 2079
Anguis colchica	Poland	Puszcza Niepołomicka	50.015	20.4151		Pabijan, personal database	GPS	MPFC 2080
Anguis colchica	Poland	Puszcza Niepołomicka	50.0231	20.2923		Pabijan, personal database	GPS	MPFC 2289
Anguis colchica	Poland	Puszcza Niepołomicka	50.0014	20.3181		Pabijan, personal database	GPS	MPFC 3112, 3113, 3114, 3115, 3116
Anguis colchica	Poland	Rabka Zdrój	49.5971	19.9871		Pabijan, personal database	GPS	MPFC 1966
Anguis colchica	Poland	Radłów	50.07	20.83	187	GBIF	GPS
Anguis colchica	Poland	Rajcza	49.5	19.11	657	Jablonski et al., 2017	Literature	3686	MF817480
Anguis colchica	Poland	Rakowa, Góry Słonne	49.5482	22.3953		Pabijan, personal database	GPS	MPFC 1113
Anguis colchica	Poland	Rakszawa	50.16	22.25	237	GBIF	GPS
Anguis colchica	Poland	Roztoczański PN	50.5572	23.006		Pabijan, personal database	GPS	MPFC 4042
Anguis colchica	Poland	Roztoczański PN	50.5918	23.0619		Pabijan, personal database	GPS	MPFC 4047
Anguis colchica	Poland	Roztoczański PN	50.5553	23.0026		Pabijan, personal database	GPS	MPFC 4049
Anguis colchica	Poland	Roztoczański PN	50.5903	22.9947		Pabijan, personal database	GPS	MPFC 4050
Anguis colchica	Poland	Roztoczański PN	50.54	23.031		Pabijan, personal database	GPS	MPFC 4051
Anguis colchica	Poland	Roztoczański PN	50.5831	23.0599		Pabijan, personal database	GPS	MPFC 4053
Anguis colchica	Poland	Roztoczański PN	50.5991	23.0367		Pabijan, personal database	GPS	MPFC 4055
Anguis colchica	Poland	Roztoczański PN	50.5542	23.0003		Pabijan, personal database	GPS	MPFC 4056
Anguis colchica	Poland	Roztoczański PN	50.594	23.0021		Pabijan, personal database	GPS	MPFC 4057
Anguis colchica	Poland	Roztoczański PN	50.5584	23.0076		Pabijan, personal database	GPS	MPFC 4060
Anguis colchica	Poland	Rudnik	50.8726	22.9526		Pabijan, personal database	GPS	MPFC 1741
Anguis colchica	Poland	Rząska	50.0904	19.8419		Pabijan, personal database	GPS	MPFC 2171
Anguis colchica	Poland	Sękowiec	49.23	22.55	556	Jablonski et al., 2017	Literature	3694	MF817484
Anguis colchica	Poland	Sichow	50.47	21.17	169	Bellati et al., unpublished	Literature
Anguis colchica	Poland	Skiwy Duże	52.5	22.75	163	GBIF	GPS
Anguis colchica	Poland	Smerekowiec	49.5	21.25	469	GBIF	GPS
Anguis colchica	Poland	Solinka	49.16	22.25	760	GBIF	GPS
Anguis colchica	Poland	Stary Sącz	49.57	20.62	303	Jablonski et al., 2017	Literature	3687	MF817481
[truncated: 26,587 more rows]

## Sheet: Table S2
Table S2. Additional mtDNA data (ND2) of Anguis spp. used to refine localizations of secondary contact zones in the Balkans. Haplogroups according to Jablonski et al. (2016).
Code	Species (mtDNA)	Country	Locality	N	E	Haplogroup	GenBank Accession Number
2024	Anguis fragilis	Greece	Treis Vrysses, Evros	41.1155	26.0215	South Balkan	MZ728058
2026	Anguis fragilis	Greece	Chortiatis, Chalkidiki	40.5846	23.1287	South Balkan	MZ728059
2027	Anguis fragilis	Greece	Zagliveri, Chalkidiki	40.5558	23.2389	South Balkan	MZ728060
2072	Anguis fragilis	Slovenia	Triglav	46.4443	13.7699	Illyrian-Central European	MZ728061
2103	Anguis fragilis	Slovenia	Borjana	46.2559	13.4884	Alpine-Pannonian	MZ728062
2111	Anguis fragilis	Slovenia	Malija	45.5023	13.6418	North Adriatic	MZ728063
2118	Anguis fragilis	Slovenia	Koštabona	45.4741	13.7522	North Adriatic	MZ728064
2126	Anguis fragilis	Slovenia	Nova Gorica	45.9489	13.6436	Illyrian-Central European	MZ728065
2141	Anguis fragilis	Slovenia	Triglav	46.4277	13.6072	Illyrian-Central European	MZ728066
2867	Anguis fragilis	Slovenia	Drežnica	46.2582	13.6039	Illyrian-Central European	MZ728067
6196	Anguis graeca	Albania	Nënshejt	41.8609	20.1259	between graeca X and XI	MZ728068

## Sheet: Table S3
Table S3. Number of 50 km squares and number of records per species of the genus Anguis in this study and Sillero et al. (2014a). Records correspond to European records; all records including regions outside Europe (as defined by Sillero et al., 2014a) are given in parentheses.
	This study		Sillero et al. (2014a)
Species	50 km squares	Records	50 km squares	Records
Anguis cephallonica	15	185	11	33
Anguis colchica	847	4166 (4390)	1820	12315
Anguis fragilis	1069	21232
Anguis graeca	49	532
Anguis veronensis	90	367
Grey zone	179	1677
TOTAL	2249	28159 (28383)	1831	12348
